# Supplementary material for: Variation in the reproductive quality of honey bee males affects their age of flight attempt
Source: PeerJ. 2022 Aug 2;10:e13859. doi: 10.7717/peerj.13859 (PMC9354755; doi:10.7717/peerj.13859)
Supplement: Supplemental Information 1 [file peerj-10-13859-s001.xlsx]

## Sheet: Everything
database ID	drone paint markings	order in which drones were tagged	statistical weights for dead drone counts	drone source colony name	drone foster colony name	drone emergence date	drone capture date	drone capture location	drone capture condition	did the drone fly?	was the drone dissected?	age drone was captured in days	emergence body mass (mg)	emergence head width (mm)	emergence thorax width (mm)	captured total sperm count	captured live sperm count	captured sperm viability	captured body mass (mg)	captured thorax mass (mg)	captured head width (mm)	captured thorax width (mm)	captured average mucus gland length (mm)	captured seminal vesicle average length (mm)	average cell size of drone frame	mite count of drone source colony
QD	Tag	tag.order	weight	Source	Foster	e.Date	c.Date	c.Location	c.Condition	c.Flight	Dissected	c.Age	em.Body	el.Head	el.Thorax	cc.Sperm	cl.Sperm	cv.Sperm	cm.Body	cm.Thorax	cl.Head	cl.Thorax	cl.Mucus	cl.Seminal	Cell.Size	Mite.Count
QD443	Blu/Blu		1	71	PM	2018-06-18	2018-06-25	Cage	Live	TRUE	TRUE	7				10.7067	10.08	0.941667	234.1	100.6	4.52	5.94	5.29	4.2	12.98	4
QD507	Blu/Blu		1	71	PM	2018-06-18	2018-06-27	Cage	Live	TRUE	TRUE	9				6.64367	5.20333	0.797667	196.8	94.3	4.37	5.59	4.9	3.95	12.98	4
QD593	Blu/Blu		1	71	PM	2018-06-18	2018-06-28	Cage	Live	TRUE	TRUE	10				3.6984	3.29333	0.902	216.9	102.8	4.39	5.97	5.31	3.52	12.98	4
QD668	Blu/Blu		1	71	AM	2018-06-18	2018-06-30	Cage	Live	TRUE	TRUE	12.5				15.3133	12.6333	0.825	208.4	92	4.39	5.76	4.91	3.98	12.98	4
QD506	Blu/Prp		1	DLD	PM	2018-06-18	2018-06-27	Cage	Live	TRUE	TRUE	9				4.45867	2.99	0.638	214	102.9	4.6	5.88	5.3	4.09	13.93	16
QD509	Blu/Prp		1	DLD	PM	2018-06-18	2018-06-27	Cage	Live	TRUE	TRUE	9				6.732	5.47667	0.814667	187	87.9	4.26	5.51	4.44	3.51	13.93	16
QD591	Blu/Prp		1	DLD	PM	2018-06-18	2018-06-28	Cage	Live	TRUE	TRUE	10				6.675	5.80667	0.864667	169.7	76.6	4.07	5.24	5.29	3.6	13.93	16
QD592	Blu/Prp		1	DLD	PM	2018-06-18	2018-06-28	Cage	Live	TRUE	TRUE	10				4.90633	3.34667	0.677667	183.7	86.2	4.3	5.58	5.01	2.63	13.93	16
QD699	Blu/Prp		1	DLD	PM	2018-06-18	2018-06-30	Cage	Live	TRUE	TRUE	12				13.6367	12.1	0.887333	188.8	97.4	4.65	5.77	5.08	3.57	13.93	16
QD836	Blu/Prp		1	DLD	PM	2018-06-18	2018-07-07	Cage	Live	TRUE	TRUE	19				10.6693	9.8	0.920333	198.1	93	4.52	5.79	5.2	3.31	13.93	16
QD363	Blu/Red		1	14	AM	2018-06-18	2018-06-23	Cage	Live	TRUE	TRUE	5.5				3.70725	2.8425	0.77175	221.4	102.9	4.53	5.93	5.1	4.13	12.88	21
QD382	Blu/Red		1	14	PM	2018-06-18	2018-06-23	Cage	Live	TRUE	TRUE	5				3.30367	2.68667	0.816333	271.5	97.6	4.26	5.5	4.79	2.94	12.88	21
QD429	Blu/Red		1	14	AM	2018-06-18	2018-06-25	Cage	Live	TRUE	TRUE	7.5				10.0177	9.32667	0.933667	216.4	101.8	4.36	5.79	4.96	3.5	12.88	21
QD431	Blu/Red		1	14	AM	2018-06-18	2018-06-25	Cage	Live	TRUE	TRUE	7.5				7.903	5.90333	0.765333	218.4	99.4	4.55	6.01		3.01	12.88	21
QD441	Blu/Red		1	14	PM	2018-06-18	2018-06-25	Cage	Live	TRUE	TRUE	7				4.50567	3.74333	0.821333	182	83.9	4.35	5.48	4.93	3.58	12.88	21
QD508	Blu/Red		1	14	PM	2018-06-18	2018-06-27	Cage	Live	TRUE	TRUE	9				1.653	0.996667	0.468	178.4	87.5	4.43	5.69	4.9	3.55	12.88	21
QD523	Blu/Red		1	14	AM	2018-06-18	2018-06-27	Cage	Live	TRUE	TRUE	9.5				6.0593	5.68667	0.944	208	101	4.48	5.93	5.26	2.92	12.88	21
QD347	Blu/Wht		1	61	PM	2018-06-18	2018-06-21	Cage	Live	TRUE	TRUE	3				2.01767	1.123	0.571333	196.2	85.9	4.29	5.56	5.1	3.69	13.42	13
QD348	Blu/Wht		1	61	PM	2018-06-18	2018-06-21	Cage	Live	TRUE	TRUE	3				11.9533	8.04667	0.682	202.1	92.5	4.5	5.78	5.08	3.32	13.42	13
QD360	Blu/Wht		1	61	AM	2018-06-18	2018-06-23	Cage	Live	TRUE	TRUE	5.5				4.24833	3.35	0.785	209.8	91.7	4.23	5.7	4.41	3.21	13.42	13
QD361	Blu/Wht		1	61	AM	2018-06-18	2018-06-23	Cage	Live	TRUE	TRUE	5.5				1.548	0.620333	0.399	190	86.7	4.29	5.46	3.99	3.14	13.42	13
QD362	Blu/Wht		1	61	AM	2018-06-18	2018-06-23	Cage	Live	TRUE	TRUE	5.5				2.39133	1.03467	0.431	189.2	86.4	4.3	5.68	3.53	3.09	13.42	13
QD364	Blu/Wht		1	61	AM	2018-06-18	2018-06-23	Cage	Live	TRUE	TRUE	5.5				4.633	3.85333	0.834	206.6	90.3	4.4	5.55	4.99	3.52	13.42	13
QD365	Blu/Wht		1	61	AM	2018-06-18	2018-06-23	Cage	Live	TRUE	TRUE	5.5				3.57667	3.21333	0.899667	207.4	91.9	4.19	5.51	4.79	4.1	13.42	13
QD404	Blu/Wht		1	61	AM	2018-06-18	2018-06-24	Cage	Live	TRUE	TRUE	6.5				8.89167	7.32	0.827333	156.8	92.7	4.35	5.7	5.72	4.06	13.42	13
QD410	Blu/Wht		1	61	AM	2018-06-18	2018-06-24	Cage	Live	TRUE	TRUE	6.5				1.70033	1.084	0.604	172.5	82.7	4.24	5.51	4.66	3.23	13.42	13
QD411	Blu/Wht		1	61	AM	2018-06-18	2018-06-24	Cage	Live	TRUE	TRUE	6.5				1.71367	1.216	0.661667	163.1	67.7	4.12	5.22	4.31	3.01	13.42	13
QD430	Blu/Wht		1	61	AM	2018-06-18	2018-06-25	Cage	Live	TRUE	TRUE	7.5				9.92333	8.27333	0.835333	206.7	101.6	4.51	5.89		3.05	13.42	13
QD433	Blu/Wht		1	61	AM	2018-06-18	2018-06-25	Cage	Live	TRUE	TRUE	7.5				5.74833	4.95333	0.863333	193.7	91	4.33	5.64	4.69	3.23	13.42	13
QD525	Blu/Wht		1	61	AM	2018-06-18	2018-06-27	Cage	Live	TRUE	TRUE	9.5				7.41667	5.20667	0.702333	195	86.6	4.36	5.65		3.1	13.42	13
QD527	Blu/Wht		1	61	AM	2018-06-18	2018-06-27	Cage	Live	TRUE	TRUE	9.5				4.499	3.87	0.855	194.4	95	4.35	5.78	4.78	3.72	13.42	13
QD556	Blu/Wht		1	61	AM	2018-06-18	2018-06-28	Cage	Live	TRUE	TRUE	10.5				17.6467	15.3	0.867	192.2	87	4.39	5.68	5.34	3.44	13.42	13
QD558	Blu/Wht		1	61	AM	2018-06-18	2018-06-28	Cage	Live	TRUE	TRUE	10.5				11.6467	10.4333	0.896	201.9	90.1	4.34	5.58		2.85	13.42	13
QD559	Blu/Wht		1	61	AM	2018-06-18	2018-06-28	Cage	Live	TRUE	TRUE	10.5				12.1567	8.24667	0.681667	197.5	88.8	4.44	5.79	5	3.79	13.42	13
QD560	Blu/Wht		1	61	AM	2018-06-18	2018-06-28	Cage	Live	TRUE	TRUE	10.5				12.2643	11.1	0.904	217.3	94.7	4.13	5.75	5.12	3.72	13.42	13
QD630	Blu/Wht		1	61	AM	2018-06-18	2018-06-29	Cage	Live	TRUE	TRUE	11.5				11.355	10.3367	0.909667	175.3	79.5	4.29	5.6		3.24	13.42	13
QD669	Blu/Wht		1	61	AM	2018-06-18	2018-06-30	Cage	Live	TRUE	TRUE	12.5				2.746	2.41667	0.881	179.7	88	4.48	5.66		2.75	13.42	13
QD709	Blu/Wht		1	61	AM	2018-06-18	2018-07-01	Cage	Live	TRUE	TRUE	13.5				12.5913	11.4567	0.91	178.3	85.1	4.36	5.52	4.97	3.63	13.42	13
QD432	Blu/Yel		1	32	AM	2018-06-18	2018-06-25	Cage	Live	TRUE	TRUE	7.5				6.65	5.36333	0.811667	182.2	89.3	4.31	5.68	5.5	3.58	13.27	9
QD442	Blu/Yel		1	32	PM	2018-06-18	2018-06-25	Cage	Live	TRUE	TRUE	7				8.07333	7.25	0.899	218.5	95.1	4.38	5.88	5.41	3.77	13.27	9
QD505	Blu/Yel		1	32	PM	2018-06-18	2018-06-27	Cage	Live	TRUE	TRUE	9				9.48667	8.02333	0.85	187.5	88.6	4.43	5.69		3.31	13.27	9
QD524	Blu/Yel		1	32	AM	2018-06-18	2018-06-27	Cage	Live	TRUE	TRUE	9.5				8.49633	7.64333	0.904333	207.3	97.2	4.49	5.82	5.4	3.28	13.27	9
QD526	Blu/Yel		1	32	AM	2018-06-18	2018-06-27	Cage	Live	TRUE	TRUE	9.5				7.526	6.69	0.892	190.1	88			5.56	3.38	13.27	9
QD557	Blu/Yel		1	32	AM	2018-06-18	2018-06-28	Cage	Live	TRUE	TRUE	10.5				15.1967	10.6167	0.700667	223.7	94	4.48	5.9	4.82	3.76	13.27	9
QD594	Blu/Yel		1	32	PM	2018-06-18	2018-06-28	Cage	Live	TRUE	TRUE	10				2.52733	1.57	0.632333	202.3	93.4	4.55	5.75	5.43	3.39	13.27	9
QD595	Blu/Yel		1	32	PM	2018-06-18	2018-06-28	Cage	Live	TRUE	TRUE	10				6.58733	5.43667	0.825667	199.7	89	4.36	5.72	5.14	3.71	13.27	9
QD631	Blu/Yel		1	32	AM	2018-06-18	2018-06-29	Cage	Live	TRUE	TRUE	11.5				9.72833	7.52333	0.787	188.8	86	4.45	5.81	4.75	3.61	13.27	9
QD562	Dkg/Blu		1	71	AM	2018-06-24	2018-06-28	Cage	Live	TRUE	TRUE	4.5				0.891333	0.394	0.456333	216.2	135.5	4.56	5.61	5.01	3.85	12.98	4
QD725	Dkg/Blu		1	71	AM	2018-06-24	2018-07-01	Cage	Live	TRUE	TRUE	7.5				6.08067	5.16667	0.849333	198.7	95.1	4.51	5.92	5.26	4.45	12.98	4
QD746	Dkg/Blu		1	71	AM	2018-06-24	2018-07-02	Cage	Live	TRUE	TRUE	8.5				18.355	15.4	0.839	233.2	98	4.53	5.82	5.44	3.55	12.98	4
QD753	Dkg/Blu		1	71	AM	2018-06-24	2018-07-03	Cage	Live	TRUE	TRUE	9.5				18.3267	13	0.710333	211.9	93.3	4.57	5.86	4.76	4.11	12.98	4
QD788	Dkg/Blu		1	71	AM	2018-06-24	2018-07-04	Cage	Live	TRUE	TRUE	10.5				15.8023	14.6333	0.928667	198.9	93.1	4.49	5.77	5.14	4.19	12.98	4
QD806	Dkg/Blu		1	71	AM	2018-06-24	2018-07-05	Cage	Live	TRUE	TRUE	11.5				12.94	9.92	0.763	213.3	96.9	4.68	5.85	5.31	3.42	12.98	4
QD917	Dkg/Blu		1	71	AM	2018-06-24	2018-07-13	Cage	Live	TRUE	TRUE	19.5				9.18333	8.27	0.883	222.3	100.3	4.44	5.88	5.38	3.82	12.98	4
QD648	Dkg/Prp		1	DLD	AM	2018-06-24	2018-06-29	Cage	Live	TRUE	TRUE	5.5				3.86333	2.35	0.587667	205.7	96.5	4.55	5.83	5.16	3.58	13.93	16
QD744	Dkg/Red		1	14	AM	2018-06-24	2018-07-02	Cage	Live	TRUE	TRUE	8.5				5.82667	2.97333	0.526	239.3	91.1	4.31	5.79	5.18	3.71	12.88	21
QD561	Dkg/Wht		1	61	AM	2018-06-24	2018-06-28	Cage	Live	TRUE	TRUE	4.5				1.44833	0.471	0.322667	205.2	89.3	4.27	5.53		3.16	13.42	13
QD649	Dkg/Wht		1	61	AM	2018-06-24	2018-06-29	Cage	Live	TRUE	TRUE	5.5				9.33	6.27	0.675	221.1	100.3	4.25	5.85		3.28	13.42	13
QD723	Dkg/Wht		1	61	AM	2018-06-24	2018-07-01	Cage	Live	TRUE	TRUE	7.5				8.82333	7.34	0.826333	183.3	85.8	4.39	5.6	4.89	3.28	13.42	13
QD745	Dkg/Wht		1	61	AM	2018-06-24	2018-07-02	Cage	Live	TRUE	TRUE	8.5				9.72	8.02667	0.829	180.7	85.7	4.22	5.63		3.29	13.42	13
QD789	Dkg/Wht		1	61	AM	2018-06-24	2018-07-04	Cage	Live	TRUE	TRUE	10.5				1.56433	0.917333	0.576	195.9	92.5	4.34	5.72	4.74	3.04	13.42	13
QD805	Dkg/Wht		1	61	AM	2018-06-24	2018-07-05	Cage	Live	TRUE	TRUE	11.5				8.97667	6.71	0.75	195.1	96.7	4.33	5.98	4.59	3.49	13.42	13
QD827	Dkg/Wht		1	61	AM	2018-06-24	2018-07-07	Cage	Live	TRUE	TRUE	13.5				9.376	8.46	0.898667	200.2	94.9	4.48	5.96		3.27	13.42	13
QD852	Dkg/Wht		1	61	AM	2018-06-24	2018-07-08	Cage	Live	TRUE	TRUE	14.5				1.16633	0.389	0.341667	170.6	81.9	4.35	5.59		2.99	13.42	13
QD873	Dkg/Wht		1	61	AM	2018-06-24	2018-07-09	Cage	Live	TRUE	TRUE	15.5				6.51667	4.5	0.674333	173.2	86.7	4.39	5.82		2.81	13.42	13
QD904	Dkg/Wht		1	61	AM	2018-06-24	2018-07-12	Cage	Live	TRUE	TRUE	18.5				7.54233	6.17667	0.82	175.2	86	4.38	5.68		2.87	13.42	13
QD650	Dkg/Yel		1	32	AM	2018-06-24	2018-06-29	Cage	Live	TRUE	TRUE	5.5				3.744	3.01333	0.805667	239.1	103	4.49	5.87	5.31	3.67	13.27	9
QD724	Dkg/Yel		1	32	AM	2018-06-24	2018-07-01	Cage	Live	TRUE	TRUE	7.5				6.529	5.46667	0.828333	155	75.2	4.21	5.34	4.8	3.64	13.27	9
QD807	Dkg/Yel		1	32	AM	2018-06-24	2018-07-05	Cage	Live	TRUE	TRUE	11.5				11.51	8.48333	0.738667	204.1	82.5	4.33	5.52			13.27	9
QD935	Dkg/Yel		1	32	AM	2018-06-24	2018-07-18	Cage	Live	TRUE	TRUE	24.5				8.74667	7.49333	0.848	188.4	86.7	4.47	5.65	5.4	3.62	13.27	9
QD394	Grn/Red		1	14	PM	2018-06-17	2018-06-23	Cage	Live	TRUE	TRUE	6				2.567	1.89333	0.727667	232	97.3	4.4	5.83	4.51	3.33	12.88	21
QD396	Grn/Red		1	14	PM	2018-06-17	2018-06-23	Cage	Live	TRUE	TRUE	6				12.47	9.4	0.755333	305.6	108.3	4.64	6.15	4.6	4.03	12.88	21
QD449	Grn/Red		1	14	PM	2018-06-17	2018-06-25	Cage	Live	TRUE	TRUE	8				5.39967	4.83	0.896	213.4	97.9	4.57	5.78	5.44	3.51	12.88	21
QD450	Grn/Red		1	14	PM	2018-06-17	2018-06-25	Cage	Live	TRUE	TRUE	8				4.73067	4.38333	0.924667	186.2	95.6	4.6	5.95	4.86	3.8	12.88	21
QD696	Grn/Red		1	14	AM	2018-06-17	2018-06-30	Cage	Live	TRUE	TRUE	13.5				0.8731	0.1231	0.143667	210.9	94.9	4.41	5.84	4.91	3.34	12.88	21
QD344	Grn/Wht		1	61	AM	2018-06-17	2018-06-21	Cage	Live	TRUE	TRUE	4.5				0.924567	0.1199	0.121667	181.5	82	4.36	5.51	4.79	3.01	13.42	13
QD345	Grn/Wht		1	61	AM	2018-06-17	2018-06-21	Cage	Live	TRUE	TRUE	4.5				0.712533	0.349	0.534	215.8	88.4	4.4	5.76	4.83	3.46	13.42	13
QD346	Grn/Wht		1	61	AM	2018-06-17	2018-06-21	Cage	Live	TRUE	TRUE	4.5				1.55867	0.864667	0.527667	219.4	92.2	4.33	5.87	5.44	3.03	13.42	13
QD352	Grn/Wht		1	61	PM	2018-06-17	2018-06-22	Cage	Live	TRUE	TRUE	5				6.50667	5.1	0.781667	191.8	86	4.25	5.62	3.92	3.47	13.42	13
QD353	Grn/Wht		1	61	PM	2018-06-17	2018-06-22	Cage	Live	TRUE	TRUE	5				0.513167	0.226833	0.382667	177.4	81.8	4.22	5.57	3.82	2.95	13.42	13
QD356	Grn/Wht		1	61	PM	2018-06-17	2018-06-23	Cage	Live	TRUE	TRUE	6				1.933	0.919667	0.409667	187.9	87.5	4.35	5.65	3.89	2.91	13.42	13
QD393	Grn/Wht		1	61	PM	2018-06-17	2018-06-23	Cage	Live	TRUE	TRUE	6				6.89333	6.26333	0.905333	236.8	98.2	4.37	5.71	3.98	3.59	13.42	13
QD395	Grn/Wht		1	61	PM	2018-06-17	2018-06-23	Cage	Live	TRUE	TRUE	6				5.383	3.30333	0.622333	211	85.4	4.29	5.59	4.27	3.3	13.42	13
QD397	Grn/Wht		1	61	PM	2018-06-17	2018-06-23	Cage	Live	TRUE	TRUE	6				8.81	7.25	0.823667	215.4	91.7	4.35	5.77	4.9	3.26	13.42	13
QD451	Grn/Wht		1	61	PM	2018-06-17	2018-06-25	Cage	Live	TRUE	TRUE	8				5.489	4.77	0.87	208.3	89.6			5.07	3.8	13.42	13
QD452	Grn/Wht		1	61	PM	2018-06-17	2018-06-25	Cage	Live	TRUE	TRUE	8				7.321	6.04	0.826333	201.5	85.6	4.37	5.61	4.76	3.46	13.42	13
QD453	Grn/Wht		1	61	PM	2018-06-17	2018-06-25	Cage	Live	TRUE	TRUE	8				7.40333	3.67333	0.484	259.7	75	4.3	5.6		3.01	13.42	13
QD489	Grn/Wht		1	61	PM	2018-06-17	2018-06-27	Cage	Live	TRUE	TRUE	10				8.90667	7.26	0.814667	198.1	90	4.32	5.72	4.88	3.22	13.42	13
QD490	Grn/Wht		1	61	PM	2018-06-17	2018-06-27	Cage	Live	TRUE	TRUE	10				5.62867	4.65333	0.804667	184.6	81.8	4.27	5.55		3.34	13.42	13
QD491	Grn/Wht		1	61	PM	2018-06-17	2018-06-27	Cage	Live	TRUE	TRUE	10				9.20667	7.98667	0.868	184	87.4	4.41	5.68	4.97	3.83	13.42	13
QD492	Grn/Wht		1	61	PM	2018-06-17	2018-06-27	Cage	Live	TRUE	TRUE	10				9.34067	8.32333	0.894	186	86.7	4.34	5.53	5.29	3.16	13.42	13
QD493	Grn/Wht		1	61	PM	2018-06-17	2018-06-27	Cage	Live	TRUE	TRUE	10				6.513	5.25667	0.810667	205.1	89.6	4.32	5.51	5.09	3.46	13.42	13
QD582	Grn/Wht		1	61	PM	2018-06-17	2018-06-28	Cage	Live	TRUE	TRUE	11				7.864	6.90333	0.877667	187.2	92.1	4.42	5.72	4.35	3.37	13.42	13
QD583	Grn/Wht		1	61	PM	2018-06-17	2018-06-28	Cage	Live	TRUE	TRUE	11				8.63133	7.56667	0.883667	201.3	85.8	4.19	5.4	4.61	2.98	13.42	13
QD584	Grn/Wht		1	61	PM	2018-06-17	2018-06-28	Cage	Live	TRUE	TRUE	11				10.4973	9.54	0.910333	199.2	89	4.22	5.53	5.16	3.65	13.42	13
QD585	Grn/Wht		1	61	PM	2018-06-17	2018-06-28	Cage	Live	TRUE	TRUE	11				7.50667	6.41333	0.852	170.3	85.5	4.25	5.7	5.24	3.18	13.42	13
QD667	Grn/Wht		1	61	PM	2018-06-17	2018-06-29	Cage	Live	TRUE	TRUE	12				5.95333	2.37667	0.433	184.3	83.2	4.35	5.61		3.49	13.42	13
QD695	Grn/Wht		1	61	AM	2018-06-17	2018-06-30	Cage	Live	TRUE	TRUE	13.5				3.86933	3.10333	0.802333	183.3	84.7	4.23	5.38	4.92	3.39	13.42	13
QD855	Grn/Wht		1	61	PM	2018-06-17	2018-07-08	Cage	Live	TRUE	TRUE	21				3.52967	2.42667	0.688	172.2	87.9	4.38	5.77		3.01	13.42	13
QD880	Grn/Wht		1	61	PM	2018-06-17	2018-07-10	Cage	Live	TRUE	TRUE	23				1.6002	1.344	0.806	158.1	70.9	4.08	5.54	4.55	2.48	13.42	13
QD908	Grn/Wht		1	61	AM	2018-06-17	2018-07-12	Cage	Live	TRUE	TRUE	25.5				6.02067	4.9	0.815	217.7	96.5	4.49	5.87		2.81	13.42	13
QD909	Grn/Wht		1	61	AM	2018-06-17	2018-07-12	Cage	Live	TRUE	TRUE	25.5				4.069	3.77	0.930333	188.6	88.3	4.33	5.68	4.93	3.1	13.42	13
QD694	Grn/Yel		1	32	AM	2018-06-17	2018-06-30	Cage	Live	TRUE	TRUE	13.5				5.57667	4.08333	0.729333	204.2	91.7	4.5	5.87	5.63	3.62	13.27	9
QD542	Gry/Blu		1	71	AM	2018-06-21	2018-06-27	Cage	Live	TRUE	TRUE	6.5				4.221	3.75667	0.856667	198.2	96.8	4.38	5.92	5.36	3.57	12.98	4
QD644	Gry/Blu		1	71	AM	2018-06-21	2018-06-29	Cage	Live	TRUE	TRUE	8.5				5.11333	2.87	0.560667	216.3	101.1	4.4	6.01	4.48	3.83	12.98	4
QD658	Gry/Blu		1	71	PM	2018-06-21	2018-06-29	Cage	Live	TRUE	TRUE	8				7.507	6.64	0.878	207.6	93.2	4.41	5.6	5.4	4.12	12.98	4
QD677	Gry/Blu		1	71	AM	2018-06-21	2018-06-30	Cage	Live	TRUE	TRUE	9.5				11.5943	9.23	0.810333	206.1	96.3	4.46	5.82	5.12	3.98	12.98	4
QD713	Gry/Blu		1	71	AM	2018-06-21	2018-07-01	Cage	Live	TRUE	TRUE	10.5				8.57333	6.05667	0.710333	201.5	90.3	4.43	5.86	5.24	3.71	12.98	4
QD743	Gry/Blu		1	71	AM	2018-06-21	2018-07-02	Cage	Live	TRUE	TRUE	11.5				15.0633	12.1667	0.807333	215.3	99.3	4.55	5.8	5.16	3.64	12.98	4
QD747	Gry/Blu		1	71	PM	2018-06-21	2018-07-02	Cage	Live	TRUE	TRUE	11				13.3167	11.4433	0.860333	207.4	95.1	4.46	5.79	5.01	3.7	12.98	4
QD761	Gry/Blu		1	71	PM	2018-06-21	2018-07-03	Cage	Live	TRUE	TRUE	12				12.5533	10.8	0.861	188.6	89.6	4.26	5.74	4.96	3.65	12.98	4
QD784	Gry/Blu		1	71	AM	2018-06-21	2018-07-04	Cage	Live	TRUE	TRUE	13.5				12.1633	10.1	0.821333	215.4	96.9	4.4	5.88	5.13	4.01	12.98	4
QD793	Gry/Blu		1	71	PM	2018-06-21	2018-07-04	Cage	Live	TRUE	TRUE	13				14.7467	12.5	0.849333	251.5	96.1	4.57	6.05	4.94	3.84	12.98	4
QD829	Gry/Blu		1	71	AM	2018-06-21	2018-07-07	Cage	Live	TRUE	TRUE	16.5				15.018	14.3	0.952	212.4	93.5	4.48	5.91	5.49	4.27	12.98	4
QD848	Gry/Blu		1	71	AM	2018-06-21	2018-07-08	Cage	Live	TRUE	TRUE	17.5				17.2	13.5	0.783	252.7	99	4.58	5.9	5.39	4.4	12.98	4
QD884	Gry/Blu		1	71	PM	2018-06-21	2018-07-10	Cage	Live	TRUE	TRUE	19				11.5017	10.0033	0.871667	197.6	94.9	4.43	5.97	5.13	3.66	12.98	4
QD936	Gry/Blu		1	71	AM	2018-06-21	2018-07-18	Cage	Live	TRUE	TRUE	27.5				14.8433	11	0.738667	230.2	108	4.56	5.82	5.21	4.22	12.98	4
QD943	Gry/Blu		1	71	PM	2018-06-21	2018-07-24	Cage	Live	TRUE	TRUE	33				9.75533	8.36667	0.852667	276	113.9	4.64	5.84	5.27	3.6	12.98	4
QD366	Gry/Grn		1	16	AM	2018-06-21	2018-06-23	Cage	Live	TRUE	TRUE	2.5				0.827333	0.300667	0.366667	209.9	97.8			5.16	3.07	13.33	3
QD369	Gry/Grn		1	16	AM	2018-06-21	2018-06-23	Cage	Live	TRUE	TRUE	2.5				0.4523	0.210367	0.510333	204.5	87	4.15	5.53	4.19	3.02	13.33	3
QD415	Gry/Grn		1	16	AM	2018-06-21	2018-06-25	Cage	Live	TRUE	TRUE	4.5				0.406967	0.347	0.569333	220	96.9	4.36	5.84	5.06	3.2	13.33	3
QD495	Gry/Grn		1	16	PM	2018-06-21	2018-06-27	Cage	Live	TRUE	TRUE	6				4.24567	2.79	0.644333	216.8	95.4	4.24	5.95	4.98	4.4	13.33	3
QD540	Gry/Grn		1	16	AM	2018-06-21	2018-06-27	Cage	Live	TRUE	TRUE	6.5				5.167	4.55	0.879667	224.6	99.4	4.37	5.91	5.14	3.68	13.33	3
QD566	Gry/Grn		1	16	AM	2018-06-21	2018-06-28	Cage	Live	TRUE	TRUE	7.5				7.95937	7.84	0.985	213.8	101.6	4.25	5.57	5.34	3.58	13.33	3
QD575	Gry/Grn		1	16	AM	2018-06-21	2018-06-28	Cage	Live	TRUE	TRUE	7.5				8.407	7.80667	0.931333	215.9	102.3	4.58	5.95	5.34	3.83	13.33	3
QD600	Gry/Grn		1	16	PM	2018-06-21	2018-06-28	Cage	Live	TRUE	TRUE	7				6.70933	5.98667	0.897	227	103.8	4.53	6.07	5.4	4.22	13.33	3
QD647	Gry/Grn		1	16	AM	2018-06-21	2018-06-29	Cage	Live	TRUE	TRUE	8.5				9.95	8.16	0.821333	237.2	103.7	4.48	5.91	5.1	3.54	13.33	3
QD657	Gry/Grn		1	16	PM	2018-06-21	2018-06-29	Cage	Live	TRUE	TRUE	8				4.384	3.44	0.781333	229.6	109.4	4.48	6.04	5.33	3.32	13.33	3
QD678	Gry/Grn		1	16	AM	2018-06-21	2018-06-30	Cage	Live	TRUE	TRUE	9.5				9.70633	8.22333	0.853667	218	100.7	4.25	6.02	5.26	3.48	13.33	3
QD741	Gry/Grn		1	16	AM	2018-06-21	2018-07-02	Cage	Live	TRUE	TRUE	11.5				13.2	10.1933	0.774	231.9	96.7	4.37	5.93	5.31	3.45	13.33	3
QD760	Gry/Grn		1	16	PM	2018-06-21	2018-07-03	Cage	Live	TRUE	TRUE	12				10.5633	8.10667	0.768667	225.9	101.6	4.4	5.93	5.28	3.9	13.33	3
QD783	Gry/Grn		1	16	AM	2018-06-21	2018-07-04	Cage	Live	TRUE	TRUE	13.5				13	11.0233	0.847	262.9	109.9	4.36	5.91	5.25	3.32	13.33	3
QD897	Gry/Grn		1	16	PM	2018-06-21	2018-07-12	Cage	Live	TRUE	TRUE	21				12.1533	9.74	0.796667	245	105.2	4.49	6.13	5.19	3.67	13.33	3
QD497	Gry/Prp		1	DLD	PM	2018-06-21	2018-06-27	Cage	Live	TRUE	TRUE	6				10.725	9.70333	0.905	216.3	80.9	4.37	5.47		4.02	13.93	16
QD544	Gry/Prp		1	DLD	AM	2018-06-21	2018-06-27	Cage	Live	TRUE	TRUE	6.5				20.9873	19.0333	0.901	194.5	86.3	4.31	5.64		2.86	13.93	16
QD549	Gry/Prp		1	DLD	AM	2018-06-21	2018-06-28	Cage	Live	TRUE	TRUE	7.5				7.77667	4.43667	0.586	201.1	91.2	4.42	5.82	4.8	3.08	13.93	16
QD570	Gry/Prp		1	DLD	AM	2018-06-21	2018-06-28	Cage	Live	TRUE	TRUE	7.5				6.92933	6.66	0.961667	184.7	85.4	4.42	5.71	4.99	3.53	13.93	16
QD599	Gry/Prp		1	DLD	PM	2018-06-21	2018-06-28	Cage	Live	TRUE	TRUE	7				8.24067	7.27	0.883	197.2	92	4.55	5.61	5.01	3.71	13.93	16
QD643	Gry/Prp		1	DLD	AM	2018-06-21	2018-06-29	Cage	Live	TRUE	TRUE	8.5				10.47	9.50667	0.911	197.2	94.1	4.42	5.75	5.02	3.48	13.93	16
QD740	Gry/Prp		1	DLD	AM	2018-06-21	2018-07-02	Cage	Live	TRUE	TRUE	11.5				12.52	8.36333	0.67	179.4	83.2	4.38	5.55	5.14	3.38	13.93	16
QD794	Gry/Prp		1	DLD	PM	2018-06-21	2018-07-04	Cage	Live	TRUE	TRUE	13				16.43	12.49	0.761667	246.7	100.2	4.5	5.79	5.33	4.15	13.93	16
QD921	Gry/Prp		1	DLD	PM	2018-06-21	2018-07-14	Cage	Live	TRUE	TRUE	23				6.951	6.24667	0.892333	169.8	87.8	4.38	5.81		3.54	13.93	16
QD367	Gry/Red		1	14	AM	2018-06-21	2018-06-23	Cage	Live	TRUE	TRUE	2.5				1.67367	0.607	0.341667	208.3	91	4.41	5.65	4.25	3.23	12.88	21
QD381	Gry/Red		1	14	PM	2018-06-21	2018-06-23	Cage	Live	TRUE	TRUE	2				1.99667	1.257	0.608667	214.1	88.5	4.45	5.6	4.43	3.37	12.88	21
QD407	Gry/Red		1	14	AM	2018-06-21	2018-06-24	Cage	Live	TRUE	TRUE	3.5				2.66467	2.242	0.605	204.9	93.2	4.26	5.87	5.03	3.04	12.88	21
QD408	Gry/Red		1	14	AM	2018-06-21	2018-06-24	Cage	Live	TRUE	TRUE	3.5				1.6656	0.767267	0.37	179.5	86.1	4.55	5.78	4.72	3.51	12.88	21
QD409	Gry/Red		1	14	AM	2018-06-21	2018-06-24	Cage	Live	TRUE	TRUE	3.5				3.25667	2.731	0.757333	234.7	95	4.52	5.69	4.71	3.23	12.88	21
QD414	Gry/red		1	14	AM	2018-06-21	2018-06-25	Cage	Live	TRUE	TRUE	4.5				0.393333	0.255667	0.609667	219.8	101.4	4.69	5.89	4.79	3.02	12.88	21
QD418	Gry/Red		1	14	AM	2018-06-21	2018-06-25	Cage	Live	TRUE	TRUE	4.5				1.89067	1.12867	0.398	217.3	97.8	4.58	6.02	4.79	3.53	12.88	21
QD498	Gry/Red		1	14	PM	2018-06-21	2018-06-27	Cage	Live	TRUE	TRUE	6				2.21733	1.17867	0.549333	195	89.2	4.58	5.84	5.28	3.43	12.88	21
QD541	Gry/Red		1	14	AM	2018-06-21	2018-06-27	Cage	Live	TRUE	TRUE	6.5				5.85767	4.49667	0.756	201.6	96.2	4.4	5.91	5.01	3.62	12.88	21
QD547	Gry/Red		1	14	AM	2018-06-21	2018-06-28	Cage	Live	TRUE	TRUE	7.5				8.68	6.83333	0.789	202.2	91.3	4.5	5.69	5.11	3.6	12.88	21
QD567	Gry/Red		1	14	AM	2018-06-21	2018-06-28	Cage	Live	TRUE	TRUE	7.5				5.257	4.91333	0.929	228.9	102.9	4.44	5.98	5.06	3.89	12.88	21
QD596	Gry/Red		1	14	PM	2018-06-21	2018-06-28	Cage	Live	TRUE	TRUE	7				5.10567	3.82	0.742667	209.5	93.5	4.38	5.72	5.12	3.09	12.88	21
QD642	Gry/Red		1	14	AM	2018-06-21	2018-06-29	Cage	Live	TRUE	TRUE	8.5				2.23267	1.22	0.547333	161.7	81	4.31	5.41	4.73	3.16	12.88	21
QD659	Gry/Red		1	14	PM	2018-06-21	2018-06-29	Cage	Live	TRUE	TRUE	8				6.48933	6.11333	0.943667	194	91.2	4.44	5.77	5.15	3.86	12.88	21
QD681	Gry/Red		1	14	AM	2018-06-21	2018-06-30	Cage	Live	TRUE	TRUE	9.5				5.99667	3.53667	0.59	187.5	93.9	4.46	5.92	5.03	3.58	12.88	21
QD708	Gry/Red		1	14	PM	2018-06-21	2018-06-30	Cage	Live	TRUE	TRUE	9				1.989	0.735667	0.362	203.5	91.5	4.47	6.11	4.78	3.47	12.88	21
QD835	Gry/Red		1	14	PM	2018-06-21	2018-07-07	Cage	Live	TRUE	TRUE	16				7.01433	5.03667	0.738667	192.3	93.8	4.48	5.84		3.14	12.88	21
QD854	Gry/Red		1	14	PM	2018-06-21	2018-07-08	Cage	Live	TRUE	TRUE	17				1.92133	1.5	0.770667	189.1	93.2	4.5	5.86	4.74	3.54	12.88	21
QD368	Gry/Wht		1	61	AM	2018-06-21	2018-06-23	Cage	Live	TRUE	TRUE	2.5				0.661	0.374	0.575333	219.6	91.6	4.34	5.48	3.82	2.85	13.42	13
QD416	Gry/Wht		1	61	AM	2018-06-21	2018-06-25	Cage	Live	TRUE	TRUE	4.5				0.361067	0.285933	0.745	179.3	81.1	4.13	5.18		3.2	13.42	13
QD417	Gry/Wht		1	61	AM	2018-06-21	2018-06-25	Cage	Live	TRUE	TRUE	4.5				2.14867	1.59367	0.65	210.4	93.3	4.52	5.69	4.88	2.82	13.42	13
QD496	Gry/Wht		1	61	PM	2018-06-21	2018-06-27	Cage	Live	TRUE	TRUE	6				7.4	4.62667	0.58	174	80.1	4.32	5.38		3.38	13.42	13
QD543	Gry/Wht		1	61	AM	2018-06-21	2018-06-27	Cage	Live	TRUE	TRUE	6.5				6.36233	5.25333	0.833	193.3	85.3	4.29	5.52		4.01	13.42	13
QD548	Gry/Wht		1	61	AM	2018-06-21	2018-06-28	Cage	Live	TRUE	TRUE	7.5				10.0667	7.52	0.743667	208.2	99	4.42	5.98	5.18	3.37	13.42	13
QD568	Gry/Wht		1	61	AM	2018-06-21	2018-06-28	Cage	Live	TRUE	TRUE	7.5				6.50413	6.4	0.981667	190.3	89.8	4.27	5.77	5.45	3.39	13.42	13
QD598	Gry/Wht		1	61	PM	2018-06-21	2018-06-28	Cage	Live	TRUE	TRUE	7				5.05367	4.33333	0.852333	171.4	82.2	4.34	5.65		3.02	13.42	13
QD646	Gry/Wht		1	61	AM	2018-06-21	2018-06-29	Cage	Live	TRUE	TRUE	8.5				8.54433	7.73333	0.901333	199.6	95	4.43	5.81	5.04	3.5	13.42	13
QD679	Gry/Wht		1	61	AM	2018-06-21	2018-06-30	Cage	Live	TRUE	TRUE	9.5				4.80333	3.15333	0.656667	216.4	95.3	4.46	5.77	5.07	3.68	13.42	13
QD712	Gry/Wht		1	61	AM	2018-06-21	2018-07-01	Cage	Live	TRUE	TRUE	10.5				10.4133	7.15333	0.695333	171.4	83.2	4.29	5.61	4.45	3.17	13.42	13
QD742	Gry/Wht		1	61	AM	2018-06-21	2018-07-02	Cage	Live	TRUE	TRUE	11.5				10.2233	7.79667	0.765667	200.7	95.8	4.38	5.88			13.42	13
QD756	Gry/Wht		1	61	AM	2018-06-21	2018-07-03	Cage	Live	TRUE	TRUE	12.5				7.93333	6.21333	0.780667	189.9	95.4	4.37	5.75	5.19	3.22	13.42	13
QD785	Gry/Wht		1	61	AM	2018-06-21	2018-07-04	Cage	Live	TRUE	TRUE	13.5				6.39133	5.53333	0.874333	198.6	89	4.29	5.84	5.34	3.21	13.42	13
QD792	Gry/Wht		1	61	PM	2018-06-21	2018-07-04	Cage	Live	TRUE	TRUE	13				15.3733	11.1733	0.729333	208	96.2	4.5	5.73	4.6	3.56	13.42	13
QD813	Gry/Wht		1	61	PM	2018-06-21	2018-07-05	Cage	Live	TRUE	TRUE	14				4.78167	3.56667	0.714667	156.5	72.6	4.22	5.53		2.96	13.42	13
QD849	Gry/Wht		1	61	AM	2018-06-21	2018-07-08	Cage	Live	TRUE	TRUE	17.5				5.76	3.53	0.601	185.4	88.3	4.41	5.76	5.19	2.98	13.42	13
QD896	Gry/Wht		1	61	PM	2018-06-21	2018-07-12	Cage	Live	TRUE	TRUE	21				6.83567	5.91	0.874	192.5	89.1	4.4	5.87		3.86	13.42	13
QD902	Gry/Wht		1	61	AM	2018-06-21	2018-07-12	Cage	Live	TRUE	TRUE	21.5				2.04367	1.47333	0.721333	223.1	92	4.39	5.6	5.12	3.61	13.42	13
QD931	Gry/Wht		1	61	AM	2018-06-21	2018-07-17	Cage	Live	TRUE	TRUE	26.5				11.6967	9.07333	0.768667	221.1	87.6	4.33	5.68	5.21	3.68	13.42	13
QD937	Gry/Wht		1	61	AM	2018-06-21	2018-07-18	Cage	Live	TRUE	TRUE	27.5				13.7867	10.57	0.778	213.1	100	4.46	6.05	5.28	3.68	13.42	13
QD494	Gry/Yel		1	32	PM	2018-06-21	2018-06-27	Cage	Live	TRUE	TRUE	6				7.55167	4.37167	0.495	219.9	97	4.57	5.89	4.97	3.41	13.27	9
QD539	Gry/Yel		1	32	AM	2018-06-21	2018-06-27	Cage	Live	TRUE	TRUE	6.5				10.2177	8.95667	0.874667	196.4	90.4	4.35	5.65		3.75	13.27	9
QD569	Gry/Yel		1	32	AM	2018-06-21	2018-06-28	Cage	Live	TRUE	TRUE	7.5				4.13433	3.59667	0.867333	201	93.2	4.44	5.8	5.01	3.8	13.27	9
QD576	Gry/Yel		1	32	AM	2018-06-21	2018-06-28	Cage	Live	TRUE	TRUE	7.5				5.069	3.59667	0.721333	206.6	94.8	4.48	5.85	5.06	3	13.27	9
QD597	Gry/Yel		1	32	PM	2018-06-21	2018-06-28	Cage	Live	TRUE	TRUE	7				9.516	8.18333	0.860333	209.5	97.4	4.31	5.69	5.2	3.28	13.27	9
QD645	Gry/Yel		1	32	AM	2018-06-21	2018-06-29	Cage	Live	TRUE	TRUE	8.5				11.4912	10.0225	0.87225	191.4	87.2	4.48	5.59	5.29	3.53	13.27	9
QD680	Gry/Yel		1	32	AM	2018-06-21	2018-06-30	Cage	Live	TRUE	TRUE	9.5				9.99667	7.06667	0.703	200.1	91.3	4.41	5.77	5.21	3.1	13.27	9
QD762	Gry/Yel		1	32	PM	2018-06-21	2018-07-03	Cage	Live	TRUE	TRUE	12				2.44667	1.2	0.490333	189.1	84.2	4.36	5.58	4.64	2.67	13.27	9
QD893	Gry/Yel		1	32	PM	2018-06-21	2018-07-12	Cage	Live	TRUE	TRUE	21				3.17333	1.84	0.617667	190.7	87.2	4.5	5.69	5.17	3.39	13.27	9
QD370	Pnk/Blu		1	71	AM	2018-06-19	2018-06-23	Cage	Live	TRUE	TRUE	4.5				3.776	2.77	0.733667	276.2	106.4	4.45	5.89	3.8	3.46	12.98	4
QD402	Pnk/Blu		1	71	PM	2018-06-19	2018-06-24	Cage	Live	TRUE	TRUE	5				3.84633	2.94667	0.77	180.7	70.3	4.45	5.81	4.69	3.56	12.98	4
QD427	Pnk/Blu		1	71	AM	2018-06-19	2018-06-25	Cage	Live	TRUE	TRUE	6.5				6.35925	5.5125	0.8685	231.5	106.9	4.27	5.84	5.2	4.12	12.98	4
QD514	Pnk/Blu		1	71	PM	2018-06-19	2018-06-27	Cage	Live	TRUE	TRUE	8				5.429	4.77	0.879	210.6	101.2	4.6	5.94	4.76	4.7	12.98	4
QD530	Pnk/Blu		1	71	AM	2018-06-19	2018-06-27	Cage	Live	TRUE	TRUE	8.5				3.96633	3.09667	0.775	221.9	100.9	4.35	6	6.29	3.14	12.98	4
QD578	Pnk/Blu		1	71	AM	2018-06-19	2018-06-28	Cage	Live	TRUE	TRUE	9.5				12.5167	10.5267	0.853	232.5	102.7	4.44	6.02	5.37	3.24	12.98	4
QD603	Pnk/Blu		1	71	PM	2018-06-19	2018-06-28	Cage	Live	TRUE	TRUE	9				8.428	7.6	0.897667	219.3	103.2	4.49	6.09		4.04	12.98	4
QD728	Pnk/Blu		1	71	PM	2018-06-19	2018-07-01	Cage	Live	TRUE	TRUE	12				11.7967	8.86333	0.753667	214.6	94.4	4.57	5.88	4.86	3.87	12.98	4
QD833	Pnk/Blu		1	71	PM	2018-06-19	2018-07-07	Cage	Live	TRUE	TRUE	18				15.03	13.1333	0.880333	255.7	104.9	4.37	6.03		4.46	12.98	4
QD874	Pnk/Blu		1	71	AM	2018-06-19	2018-07-09	Cage	Live	TRUE	TRUE	20.5				12.5467	10.0767	0.808333	198.8	92	4.26	5.85	5.23	3.46	12.98	4
QD919	Pnk/Blu		1	71	AM	2018-06-19	2018-07-13	Cage	Live	TRUE	TRUE	24.5				10.87	9.18	0.844333	204.7	102.2	4.44	5.84	5.51	4.19	12.98	4
QD383	Pnk/Grn		1	16	PM	2018-06-19	2018-06-23	Cage	Live	TRUE	TRUE	4				4.14267	3.22333	0.785333	230.1	96.4	4.32	5.79	4.92	3.62	13.33	3
QD426	Pnk/Grn		1	16	AM	2018-06-19	2018-06-25	Cage	Live	TRUE	TRUE	6.5				7.315	6.71667	0.901667	218.2	90	4.43	6.06		3.56	13.33	3
QD444	Pnk/Grn		1	16	PM	2018-06-19	2018-06-25	Cage	Live	TRUE	TRUE	6				5.84367	5.36333	0.917	230	105.1	4.53	6.01	4.85	3.35	13.33	3
QD512	Pnk/Grn		1	16	PM	2018-06-19	2018-06-27	Cage	Live	TRUE	TRUE	8				6.203	5.08333	0.812667	211	101.1	4.48	5.85	5.32	4.07	13.33	3
QD529	Pnk/Grn		1	16	AM	2018-06-19	2018-06-27	Cage	Live	TRUE	TRUE	8.5				11.0613	9.93667	0.898	206.3	104.5	4.45	5.87	5.54	4.16	13.33	3
QD577	Pnk/Grn		1	16	AM	2018-06-19	2018-06-28	Cage	Live	TRUE	TRUE	9.5				7.97133	6.02333	0.769	209.3	96.5	4.35	5.87	5.38	3.99	13.33	3
QD604	Pnk/Grn		1	16	PM	2018-06-19	2018-06-28	Cage	Live	TRUE	TRUE	9				6.788	6.13	0.909667	232.2	100.6	4.42	5.89	4.74	3.58	13.33	3
QD633	Pnk/Grn		1	16	AM	2018-06-19	2018-06-29	Cage	Live	TRUE	TRUE	10.5				7.26333	5.88333	0.810333	192.9	94.7	4.37	5.91		3.07	13.33	3
QD665	Pnk/Grn		1	16	PM	2018-06-19	2018-06-29	Cage	Live	TRUE	TRUE	10				8.99333	7.36	0.821333	216.9	98.5	4.43	5.7	5.19	3.36	13.33	3
QD671	Pnk/Grn		1	16	AM	2018-06-19	2018-06-30	Cage	Live	TRUE	TRUE	11.5				13.1667	12.0333	0.913	213.8	93.9	4.45	5.83	5.3	4.07	13.33	3
QD759	Pnk/Grn		1	16	AM	2018-06-19	2018-07-03	Cage	Live	TRUE	TRUE	14.5				10.65	8.85333	0.831333	200	96.7	4.39	5.78	4.98	3.57	13.33	3
QD768	Pnk/Grn		1	16	PM	2018-06-19	2018-07-03	Cage	Live	TRUE	TRUE	14				12.6417	10.23	0.820333	210.2	103.6	4.45	5.83	5.37	3.25	13.33	3
QD790	Pnk/Grn		1	16	PM	2018-06-19	2018-07-04	Cage	Live	TRUE	TRUE	15				14.73	12.3367	0.832333	229.7	97.5	4.46	5.83	4.2	3.46	13.33	3
QD814	Pnk/Grn		1	16	PM	2018-06-19	2018-07-05	Cage	Live	TRUE	TRUE	16				6.08	4.88	0.798	207.2	92.6		5.65	5.21	3.07	13.33	3
QD834	Pnk/Grn		1	16	PM	2018-06-19	2018-07-07	Cage	Live	TRUE	TRUE	18				16.23	12.8667	0.796	223.5	101.8	4.4	5.87		3.51	13.33	3
QD373	Pnk/Prp		1	DLD	AM	2018-06-19	2018-06-23	Cage	Live	TRUE	TRUE	4.5				2.53367	1.97667	0.755667	197.1	90.7	4.42	5.64	4.69	3.43	13.93	16
QD424	Pnk/Prp		1	DLD	AM	2018-06-19	2018-06-25	Cage	Live	TRUE	TRUE	6.5				9.705	8.13333	0.842667	193.6	87.8	4.36	5.62	5.06	3.29	13.93	16
QD445	Pnk/Prp		1	DLD	PM	2018-06-19	2018-06-25	Cage	Live	TRUE	TRUE	6				2.57133	2.122	0.786	179.4	81.2	4.36	5.47	4.85	3.1	13.93	16
QD511	Pnk/Prp		1	DLD	PM	2018-06-19	2018-06-27	Cage	Live	TRUE	TRUE	8				6.097	4.69333	0.776667	196.5	89.3	4.33	5.79	4.12	4.7	13.93	16
QD531	Pnk/Prp		1	DLD	AM	2018-06-19	2018-06-27	Cage	Live	TRUE	TRUE	8.5				7.69833	6.59333	0.865667	198.7	86.8	4.46	5.54	5.13	3.7	13.93	16
QD579	Pnk/Prp		1	DLD	AM	2018-06-19	2018-06-28	Cage	Live	TRUE	TRUE	9.5				6.45133	5.40667	0.835333	178.1	81.4	4.21	5.51	4.95	3.75	13.93	16
QD605	Pnk/Prp		1	DLD	PM	2018-06-19	2018-06-28	Cage	Live	TRUE	TRUE	9				9.84067	9.07667	0.925	205.9	93.4	4.41	5.61	4.89	3.27	13.93	16
QD666	Pnk/Prp		1	DLD	PM	2018-06-19	2018-06-29	Cage	Live	TRUE	TRUE	10				7.92333	6.5	0.82	185.7	89.2	4.39	5.63	4.56	3.37	13.93	16
QD697	Pnk/Prp		1	DLD	PM	2018-06-19	2018-06-30	Cage	Live	TRUE	TRUE	11				6.17667	4.54333	0.734	185.2	92.7	4.51	5.6	4.97	3.36	13.93	16
QD704	Pnk/Prp		1	DLD	PM	2018-06-19	2018-06-30	Cage	Live	TRUE	TRUE	11				7.74133	6.70333	0.865667	193	90.4	4.44	5.68	5	2.78	13.93	16
QD727	Pnk/Prp		1	DLD	PM	2018-06-19	2018-07-01	Cage	Live	TRUE	TRUE	12				1.78967	1.30567	0.716333	158.9	77.3	4.14	5.63	4.77	3.1	13.93	16
QD769	Pnk/Prp		1	DLD	PM	2018-06-19	2018-07-03	Cage	Live	TRUE	TRUE	14				9.04333	7.03667	0.783333	170.2	87.4	4.32	5.6	4.96	2.96	13.93	16
QD845	Pnk/Prp		1	DLD	AM	2018-06-19	2018-07-08	Cage	Live	TRUE	TRUE	19.5				3.84733	2.87667	0.748	200.1	86.3	4.38	5.63	4.61	3.35	13.93	16
QD891	Pnk/Prp		1	DLD	PM	2018-06-19	2018-07-11	Cage	Live	TRUE	TRUE	22				10.122	8.49333	0.833333	185.7	89.6	3.95	5.65	5.05	3.32	13.93	16
QD924	Pnk/Prp		1	DLD	PM	2018-06-19	2018-07-16	Cage	Live	TRUE	TRUE	27				9.53667	8.26667	0.859	197.9	92.4	4.49	5.62	5.08	3.16	13.93	16
QD934	Pnk/Prp		1	DLD	PM	2018-06-19	2018-07-18	Cage	Live	TRUE	TRUE	29				10.6967	8.74	0.814	188.3	89	4.42	5.65	5.4	3.15	13.93	16
QD349	Pnk/Red		1	14	PM	2018-06-19	2018-06-21	Cage	Live	TRUE	TRUE	2				0.8268	0.22605	0.2645	209.7	88.2	4.48	5.86	4.78	3.31	12.88	21
QD351	Pnk/Red		1	14	AM	2018-06-19	2018-06-22	Cage	Live	TRUE	TRUE	3.5				0.726	0.286667	0.331333	198.7	89.1	4.5	5.7	4.44	3.37	12.88	21
QD354	Pnk/Red		1	14	PM	2018-06-19	2018-06-22	Cage	Live	TRUE	TRUE	3				1.73767	0.287667	0.156333	177.6	86.9	4.38	5.82	4.76	3.05	12.88	21
QD371	Pnk/Red		1	14	AM	2018-06-19	2018-06-23	Cage	Live	TRUE	TRUE	4.5				0.918333	0.331333	0.368333	246.8	98.5	4.47	5.92	5.13	3.16	12.88	21
QD372	Pnk/Red		1	14	AM	2018-06-19	2018-06-23	Cage	Live	TRUE	TRUE	4.5				2.107	1.0465	0.44175	216.7	87.9	4.17	5.59	3.75	3.12	12.88	21
QD374	Pnk/Red		1	14	AM	2018-06-19	2018-06-23	Cage	Live	TRUE	TRUE	4.5				1.303	0.704	0.556	214.5	98.6	4.37	5.85	4.55	3.08	12.88	21
QD384	Pnk/Red		1	14	PM	2018-06-19	2018-06-23	Cage	Live	TRUE	TRUE	4				0.883667	0.301	0.330333	184.1	89.2	4.41	5.69	4.7	3.4	12.88	21
QD385	Pnk/Red		1	14	PM	2018-06-19	2018-06-23	Cage	Live	TRUE	TRUE	4				1.09913	0.769	0.693333	217.2	100.1	4.31	5.92	4.98	2.99	12.88	21
QD386	Pnk/Red		1	14	PM	2018-06-19	2018-06-23	Cage	Live	TRUE	TRUE	4				0.3776	0.120933	0.305	191.3	90.4	4.4	5.67	4.94	3.04	12.88	21
QD387	Pnk/Red		1	14	PM	2018-06-19	2018-06-23	Cage	Live	TRUE	TRUE	4				0.545333	0.181333	0.328667	183.9	82.5	4.44	5.69	4.68	2.93	12.88	21
QD398	Pnk/Red		1	14	PM	2018-06-19	2018-06-24	Cage	Live	TRUE	TRUE	5				0.482967	0.316633	0.535	159.6	82.9	4.51	5.75	4.62	3.38	12.88	21
QD428	Pnk/Red		1	14	AM	2018-06-19	2018-06-25	Cage	Live	TRUE	TRUE	6.5				0.330467	0.165133	0.518	182.9	84.7	4.39	5.66	4.96	2.98	12.88	21
QD446	Pnk/Red		1	14	PM	2018-06-19	2018-06-25	Cage	Live	TRUE	TRUE	6				2.03433	1.48033	0.630667	201.6	94	4.58	5.81	4.69	3.66	12.88	21
QD447	Pnk/Red		1	14	PM	2018-06-19	2018-06-25	Cage	Live	TRUE	TRUE	6				0.5432	0.422133	0.647333	188.6	89.4	4.5	5.78	4.91	3.35	12.88	21
QD448	Pnk/Red		1	14	PM	2018-06-19	2018-06-25	Cage	Live	TRUE	TRUE	6				0.964567	0.694	0.633	190	81.8	4.28	5.56		3.48	12.88	21
QD510	Pnk/Red		1	14	PM	2018-06-19	2018-06-27	Cage	Live	TRUE	TRUE	8				3.68	2.07	0.562	186.8	87.3	4.38	5.56	5.24	3.73	12.88	21
QD532	Pnk/Red		1	14	AM	2018-06-19	2018-06-27	Cage	Live	TRUE	TRUE	8.5				0.286333	0.135333	0.475667	174.1	90.4	4.51	5.85	5.2	2.93	12.88	21
QD581	Pnk/Red		1	14	AM	2018-06-19	2018-06-28	Cage	Live	TRUE	TRUE	9.5				4.22467	2.39667	0.562333	172.6	87.1	4.55	5.7	4.57	3.12	12.88	21
QD601	Pnk/Red		1	14	PM	2018-06-19	2018-06-28	Cage	Live	TRUE	TRUE	9				5.12333	4.46667	0.882	193.6	91.3	4.32	5.68	5.21	3.7	12.88	21
QD634	Pnk/Red		1	14	AM	2018-06-19	2018-06-29	Cage	Live	TRUE	TRUE	10.5				0.4081	0.1387	0.394	169.4	84.1	4.42	5.83	5.21	3.33	12.88	21
QD670	Pnk/Red		1	14	AM	2018-06-19	2018-06-30	Cage	Live	TRUE	TRUE	11.5				1.18633	0.452	0.429333	174	86.1	4.42	5.8		2.99	12.88	21
QD729	Pnk/Red		1	14	AM	2018-06-19	2018-07-02	Cage	Live	TRUE	TRUE	13.5				1.18967	0.316333	0.273333	172.7	83	4.39	5.74	4.88	3.04	12.88	21
QD767	Pnk/Red		1	14	PM	2018-06-19	2018-07-03	Cage	Live	TRUE	TRUE	14				0.837667	0.165667	0.210667	159.2	84.9	4.47	5.93	5.13	2.85	12.88	21
QD425	Pnk/Yel		1	32	AM	2018-06-19	2018-06-25	Cage	Live	TRUE	TRUE	6.5				8.82983	7.97667	0.910667	220.2	96.9	4.24	5.57	5.35	3.91	13.27	9
QD513	Pnk/Yel		1	32	PM	2018-06-19	2018-06-27	Cage	Live	TRUE	TRUE	8				5.29067	4.02667	0.764	178.1	76.8	4.29	5.36	5.09	3.64	13.27	9
QD528	Pnk/Yel		1	32	AM	2018-06-19	2018-06-27	Cage	Live	TRUE	TRUE	8.5				10.35	7.75	0.740667	206	92.9	4.26	5.62	5.39	3.92	13.27	9
QD580	Pnk/Yel		1	32	AM	2018-06-19	2018-06-28	Cage	Live	TRUE	TRUE	9.5				8.53333	7.39333	0.871333	198.4	90.9	4.37	5.73	4.55	2.79	13.27	9
QD602	Pnk/Yel		1	32	PM	2018-06-19	2018-06-28	Cage	Live	TRUE	TRUE	9				9.89067	8.96667	0.91	200.5	93.4	4.43	5.65	5.43	3.25	13.27	9
QD632	Pnk/Yel		1	32	AM	2018-06-19	2018-06-29	Cage	Live	TRUE	TRUE	10.5				10.3493	9.08667	0.87	207.6	100.1	4.47	5.65	5.79	2.97	13.27	9
QD791	Pnk/Yel		1	32	PM	2018-06-19	2018-07-04	Cage	Live	TRUE	TRUE	15				10.4967	9.43667	0.899	168	78.5	4.34	5.44		3.35	13.27	9
QD906	Pnk/Yel		1	32	AM	2018-06-19	2018-07-12	Cage	Live	TRUE	TRUE	23.5				9.085	7.64667	0.843	187.5	88.6	4.29	5.8	5.27	3.39	13.27	9
QD654	Prp/Blu		1	71	PM	2018-06-22	2018-06-29	Cage	Live	TRUE	TRUE	7				5.8025	4.9375	0.837	210.7	98.6	4.48	5.65	5.03	3.21	12.98	4
QD656	Prp/Blu		1	71	PM	2018-06-22	2018-06-29	Cage	Live	TRUE	TRUE	7				4.49467	1.45133	0.319333	244.6	102.1	4.43	5.87	4.79	3.46	12.98	4
QD705	Prp/Blu		1	71	PM	2018-06-22	2018-06-30	Cage	Live	TRUE	TRUE	8				10.6533	8.90333	0.826667	193.2	91.8	4.5	5.74	5.35	3.61	12.98	4
QD812	Prp/Blu		1	71	PM	2018-06-22	2018-07-05	Cage	Live	TRUE	TRUE	13				11.74	9.67	0.819333	201.2	93.2	4.51	5.81	5.4	4.01	12.98	4
QD825	Prp/Blu		1	71	PM	2018-06-22	2018-07-06	Cage	Live	TRUE	TRUE	14				12.4903	10.9667	0.880667	220.4	96.4	4.42	5.87	5.42	3.82	12.98	4
QD841	Prp/Blu		1	71	PM	2018-06-22	2018-07-07	Cage	Live	TRUE	TRUE	15				13.3333	11.8667	0.882667	253.4	103.7	4.52	6.03	5.37	4.3	12.98	4
QD881	Prp/Blu		1	71	PM	2018-06-22	2018-07-10	Cage	Live	TRUE	TRUE	18				11.9667	10.59	0.876667	208.5	96.3	4.47	5.94	5.25	4.41	12.98	4
QD927	Prp/Blu		1	71	PM	2018-06-22	2018-07-16	Cage	Live	TRUE	TRUE	24				12.7467	10.6033	0.833333	199.1	93.6	4.33	5.78	5.24	4.01	12.98	4
QD588	Prp/Grn		1	16	PM	2018-06-22	2018-06-28	Cage	Live	TRUE	TRUE	6				3.893	2.99333	0.780333	207	94.8	4.47	5.8	4.92	3.25	13.33	3
QD810	Prp/Grn		1	16	PM	2018-06-22	2018-07-05	Cage	Live	TRUE	TRUE	13				17.1367	11.32	0.666	223.6	97.7	4.4	5.91	5.38	3.5	13.33	3
QD434	Prp/Prp		1	DLD	PM	2018-06-22	2018-06-25	Cage	Live	TRUE	TRUE	3				0.697267	0.436933	0.537667	188.7	78.2	4.28	5.72	4.64	3.22	13.93	16
QD435	Prp/Prp		1	DLD	PM	2018-06-22	2018-06-25	Cage	Live	TRUE	TRUE	3				1.14633	0.843333	0.671667	173.7	75.7	4.34	5.78	3.17	3.34	13.93	16
QD587	Prp/Prp		1	DLD	PM	2018-06-22	2018-06-28	Cage	Live	TRUE	TRUE	6				3.31383	2.43333	0.740667	189.1	87	4.4	5.72	4.75	3.14	13.93	16
QD773	Prp/Prp		1	DLD	PM	2018-06-22	2018-07-03	Cage	Live	TRUE	TRUE	11				10.9467	8.80333	0.800667	183.6	83.2	4.37	5.62	4.53	3.66	13.93	16
QD811	Prp/Prp		1	DLD	PM	2018-06-22	2018-07-05	Cage	Live	TRUE	TRUE	13				8.95667	6.83	0.763	161.6	72.8	4.24	5.21	4.93	3.18	13.93	16
QD842	Prp/Prp		1	DLD	PM	2018-06-22	2018-07-07	Cage	Live	TRUE	TRUE	15				13.5967	11.9533	0.875	189.1	91.7	4.52	5.79	5.35	3.44	13.93	16
QD916	Prp/Prp		1	DLD	PM	2018-06-22	2018-07-13	Cage	Live	TRUE	TRUE	21				8.55233	7.11333	0.84	213.1	89	4.35	5.62	5.01	3.77	13.93	16
QD380	Prp/Red		1	14	PM	2018-06-22	2018-06-23	Cage	Live	TRUE	TRUE	1				0.948	0.465	0.492333	205.4	85.6	4.36	5.53	4.41	3.07	12.88	21
QD485	Prp/Red		1	14	PM	2018-06-22	2018-06-27	Cage	Live	TRUE	TRUE	5				1.03667	0.557	0.501	220.7	94.1	4.32	5.73	4.29	3.47	12.88	21
QD486	Prp/Red		1	14	PM	2018-06-22	2018-06-27	Cage	Live	TRUE	TRUE	5				2.40467	1.81733	0.621667	195.3	90.8	4.56	5.72	4.99	3.37	12.88	21
QD589	Prp/Red		1	14	PM	2018-06-22	2018-06-28	Cage	Live	TRUE	TRUE	6				4.884	3.68	0.752	222.6	96.2	4.32	5.78		3.09	12.88	21
QD590	Prp/Red		1	14	PM	2018-06-22	2018-06-28	Cage	Live	TRUE	TRUE	6				3.8508	3.54667	0.904667	234.4	104.2	4.52	5.73	4.99	3.43	12.88	21
QD706	Prp/Red		1	14	PM	2018-06-22	2018-06-30	Cage	Live	TRUE	TRUE	8				1.44267	0.539667	0.381333	202.3	94.5	4.46	5.92	4.7	3.68	12.88	21
QD771	Prp/Red		1	14	PM	2018-06-22	2018-07-03	Cage	Live	TRUE	TRUE	11				0.662333	0.316667	0.483333	180.8	92.3	4.45	5.89	4.97	3.08	12.88	21
QD798	Prp/Red		1	14	PM	2018-06-22	2018-07-04	Cage	Live	TRUE	TRUE	12				0.892667	0.407	0.496667	199.8	94.2	4.56	6.06	5.14	3.52	12.88	21
QD808	Prp/Red		1	14	PM	2018-06-22	2018-07-05	Cage	Live	TRUE	TRUE	13				1.81325	0.91175	0.51725	191	96.4	4.45	5.74	5.03	3.44	12.88	21
QD876	Prp/Red		1	14	PM	2018-06-22	2018-07-09	Cage	Live	TRUE	TRUE	17				1.55533	1.07433	0.676	198.9	97.4	4.43	5.91		2.99	12.88	21
QD487	Prp/Wht		1	61	PM	2018-06-22	2018-06-27	Cage	Live	TRUE	TRUE	5				3.087	1.80033	0.473333	186.7	79.7	4.31	5.59	4.08	3.69	13.42	13
QD488	Prp/Wht		1	61	PM	2018-06-22	2018-06-27	Cage	Live	TRUE	TRUE	5				1.97	1.266	0.577333	183	78.5	4.28	5.49	5.18	3.85	13.42	13
QD655	Prp/Wht		1	61	PM	2018-06-22	2018-06-29	Cage	Live	TRUE	TRUE	7				4.09367	3.46333	0.844667	187	84	4.18	5.78	4.81	3.07	13.42	13
QD707	Prp/Wht		1	61	PM	2018-06-22	2018-06-30	Cage	Live	TRUE	TRUE	8				2.91367	2.18	0.739	182.8	84.2	4.23	5.56		2.43	13.42	13
QD772	Prp/Wht		1	61	PM	2018-06-22	2018-07-03	Cage	Live	TRUE	TRUE	11				3.66933	1.65	0.476	181.2	94.2	4.35	5.6	4.97	2.29	13.42	13
QD799	Prp/Wht		1	61	PM	2018-06-22	2018-07-04	Cage	Live	TRUE	TRUE	12				0.918	0.346333	0.379	169.4	80.4	4.28	5.53	5.01	2.87	13.42	13
QD809	Prp/Wht		1	61	PM	2018-06-22	2018-07-05	Cage	Live	TRUE	TRUE	13				9.26033	8	0.861	184.9	85.5	4.3	5.68	4.92	3.19	13.42	13
QD824	Prp/Wht		1	61	PM	2018-06-22	2018-07-06	Cage	Live	TRUE	TRUE	14				4.60133	4.24	0.919333	179.3	78.8	4.27	5.45	5.12	2.91	13.42	13
QD843	Prp/Wht		1	61	PM	2018-06-22	2018-07-07	Cage	Live	TRUE	TRUE	15				9.32333	4.63333	0.483	175	84.1	4.38	5.62		3.15	13.42	13
QD853	Prp/Wht		1	61	PM	2018-06-22	2018-07-08	Cage	Live	TRUE	TRUE	16				5.95333	2.73	0.440667	154.2	78.4	4.38	5.57	4.93	3.06	13.42	13
QD898	Prp/Wht		1	61	PM	2018-06-22	2018-07-12	Cage	Live	TRUE	TRUE	20				3.47237	2.89	0.853333	176.6	78.3	4.3	5.47	5.16	2.83	13.42	13
QD900	Prp/Wht		1	61	AM	2018-06-22	2018-07-12	Cage	Live	TRUE	TRUE	20.5				1.00627	0.780333	0.791	182.3	80.3	4.25	5.47	4.98	2.75	13.42	13
QD770	Prp/Yel		1	32	PM	2018-06-22	2018-07-03	Cage	Live	TRUE	TRUE	11				13.55	12.0333	0.888667	211.2	97.3	4.55	5.71	5.36	3.02	13.27	9
QD375	Wht/Blu		1	71	AM	2018-06-20	2018-06-23	Cage	Live	TRUE	TRUE	3.5				0.544767	0.379333	0.704333	250	92.5	4.6	5.69	4.8	3.11	12.98	4
QD379	Wht/Blu		1	71	AM	2018-06-20	2018-06-23	Cage	Live	TRUE	TRUE	3.5				1.08567	0.720667	0.642667	243.7	103	4.39	5.98	4.49	2.76	12.98	4
QD420	Wht/Blu		1	71	AM	2018-06-20	2018-06-25	Cage	Live	TRUE	TRUE	5.5				9.45667	8.36333	0.871667	223	98.4	4.23	5.81	5.1	3.98	12.98	4
QD436	Wht/Blu		1	71	PM	2018-06-20	2018-06-25	Cage	Live	TRUE	TRUE	5				2.528	1.80667	0.715333	219	99.3	4.49	5.75	4.69	3.48	12.98	4
QD500	Wht/Blu		1	71	PM	2018-06-20	2018-06-27	Cage	Live	TRUE	TRUE	7				7.80667	5.02667	0.653	228.3	95.7	4.47	5.67		3.63	12.98	4
QD536	Wht/Blu		1	71	AM	2018-06-20	2018-06-27	Cage	Live	TRUE	TRUE	7.5				6.647	4.84667	0.744	207.4	99.1	4.46	5.82	5.14	3.25	12.98	4
QD572	Wht/Blu		1	71	AM	2018-06-20	2018-06-28	Cage	Live	TRUE	TRUE	8.5				10.2967	8.74	0.848667	227.7	97.3	4.52	5.72	5.34	4.21	12.98	4
QD609	Wht/Blu		1	71	PM	2018-06-20	2018-06-28	Cage	Live	TRUE	TRUE	8				3.92717	3.58	0.906	211.4	95.5	4.4	5.72		2.8	12.98	4
QD636	Wht/Blu		1	71	AM	2018-06-20	2018-06-29	Cage	Live	TRUE	TRUE	9.5				9.5	8.16667	0.859667	212.5	97.3	4.43	5.79	5.04	4.16	12.98	4
QD661	Wht/Blu		1	71	PM	2018-06-20	2018-06-29	Cage	Live	TRUE	TRUE	9				11.2967	9.46667	0.837	214.9	100.3	4.48	5.74		3.83	12.98	4
QD675	Wht/Blu		1	71	AM	2018-06-20	2018-06-30	Cage	Live	TRUE	TRUE	10.5				9.34667	7.21	0.770667	233.9	97.7	4.34	5.64	4.73	3.31	12.98	4
QD702	Wht/Blu		1	71	PM	2018-06-20	2018-06-30	Cage	Live	TRUE	TRUE	10				9.57333	7.36333	0.769667	234.5	98.9	4.47	5.91	5.27	3.94	12.98	4
QD711	Wht/Blu		1	71	AM	2018-06-20	2018-07-01	Cage	Live	TRUE	TRUE	11.5				8.51833	6.04333	0.730333	225.6	94.8	4.44	5.73	4.8	3.55	12.98	4
QD733	Wht/Blu		1	71	AM	2018-06-20	2018-07-02	Cage	Live	TRUE	TRUE	12.5				10.3033	6.86	0.677333	213.5	92.2	4.48	5.86	4.88	3.49	12.98	4
QD748	Wht/Blu		1	71	PM	2018-06-20	2018-07-02	Cage	Live	TRUE	TRUE	12				11.9533	10.3533	0.867333	178.6	89.9	4.38	5.7	5.04	3.37	12.98	4
QD766	Wht/Blu		1	71	PM	2018-06-20	2018-07-03	Cage	Live	TRUE	TRUE	13				12.7067	9.75333	0.767333	211.8	97.7	4.45	5.76	5.22	3.48	12.98	4
QD796	Wht/Blu		1	71	PM	2018-06-20	2018-07-04	Cage	Live	TRUE	TRUE	14				15.3123	13.9667	0.913333	255	104.6	4.56	5.97	5.21	3.9	12.98	4
QD804	Wht/Blu		1	71	AM	2018-06-20	2018-07-05	Cage	Live	TRUE	TRUE	15.5				10.22	7.66	0.741667	218.6	94.5	4.44	5.81	4.83	3.28	12.98	4
QD817	Wht/Blu		1	71	PM	2018-06-20	2018-07-05	Cage	Live	TRUE	TRUE	15				14.7667	10.8333	0.740333	254.2	100.5	4.41	6	5.32	3.91	12.98	4
QD822	Wht/Blu		1	71	PM	2018-06-20	2018-07-06	Cage	Live	TRUE	TRUE	16				14.022	13.1067	0.934333	222.4	96.6	4.41	5.78	5.38	3.77	12.98	4
QD830	Wht/Blu		1	71	PM	2018-06-20	2018-07-07	Cage	Live	TRUE	TRUE	17				10.5367	8.14	0.773333	212.3	97.7	4.43	5.65		3.7	12.98	4
QD856	Wht/Blu		1	71	PM	2018-06-20	2018-07-08	Cage	Live	TRUE	TRUE	18				3.83	2.39333	0.605667	206.5	100.7	4.34	5.93	5.7	3.78	12.98	4
QD879	Wht/Blu		1	71	AM	2018-06-20	2018-07-10	Cage	Live	TRUE	TRUE	20.5				11.7667	9.88	0.838333	224.9	96.3	4.55	5.95	4.99	3.77	12.98	4
QD907	Wht/Blu		1	71	AM	2018-06-20	2018-07-12	Cage	Live	TRUE	TRUE	22.5				10.5647	9.68333	0.920333	186.5	87.5	4.48	5.82	5.2	3.56	12.98	4
QD930	Wht/Blu		1	71	AM	2018-06-20	2018-07-17	Cage	Live	TRUE	TRUE	27.5				13.292	12.2	0.918667	216	107.1	4.49	5.82	5.25	3.94	12.98	4
QD932	Wht/Blu		1	71	PM	2018-06-20	2018-07-18	Cage	Live	TRUE	TRUE	28				16.5667	13.7333	0.826	184.2	92.6	4.35	5.2	5.17	4.09	12.98	4
QD938	Wht/Blu		1	71	AM	2018-06-20	2018-07-19	Cage	Live	TRUE	TRUE	29.5				14.16	12.5333	0.885333	187.1	93	4.52	5.93	5.35	3.87	12.98	4
QD377	Wht/Grn		1	16	AM	2018-06-20	2018-06-23	Cage	Live	TRUE	TRUE	3.5				0.731333	0.493	0.611333	266	101.6	4.29	5.73	6.06	3.72	13.33	3
QD389	Wht/Grn		1	16	PM	2018-06-20	2018-06-23	Cage	Live	TRUE	TRUE	3				1.29775	0.711	0.5265	211.2	87.9	4.14	5.61	5.12	2.88	13.33	3
QD392	Wht/Grn		1	16	PM	2018-06-20	2018-06-23	Cage	Live	TRUE	TRUE	3				2.58433	0.931	0.365	224.7	103	4.34	5.86	5.22	3.15	13.33	3
QD403	Wht/Grn		1	16	PM	2018-06-20	2018-06-24	Cage	Live	TRUE	TRUE	4				1.03767	0.496333	0.443333	260.2	105.9	4.48	6.11	4.98	3.39	13.33	3
QD421	Wht/Grn		1	16	AM	2018-06-20	2018-06-25	Cage	Live	TRUE	TRUE	5.5				1.765	1.29767	0.740333	219.9	97.9	4.49	5.92	5.2	3.25	13.33	3
QD482	Wht/Grn		1	16	PM	2018-06-20	2018-06-26	Cage	Live	TRUE	TRUE	6				1.12133	0.529667	0.467	232.4	104	4.45	5.92		2.99	13.33	3
QD503	Wht/Grn		1	16	PM	2018-06-20	2018-06-27	Cage	Live	TRUE	TRUE	7				8.99333	6.62667	0.736667	250.8	109	4.46	6.05	5.04	3.35	13.33	3
QD534	Wht/Grn		1	16	AM	2018-06-20	2018-06-27	Cage	Live	TRUE	TRUE	7.5				5.9	5.34667	0.893	209.2	94.5	4.47	5.78	5.23	3.68	13.33	3
QD607	Wht/Grn		1	16	PM	2018-06-20	2018-06-28	Cage	Live	TRUE	TRUE	8				3.09467	2.81	0.920333	219.7	99.7	4.41	5.93	5.17	3.33	13.33	3
QD635	Wht/Grn		1	16	AM	2018-06-20	2018-06-29	Cage	Live	TRUE	TRUE	9.5				1.77137	1.63767	0.920333	217.2	101.4	4.41	5.89	5.27	4.22	13.33	3
QD664	Wht/Grn		1	16	PM	2018-06-20	2018-06-29	Cage	Live	TRUE	TRUE	9				11.63	10.1033	0.865	214.1	99.5	4.33	5.9	5.32	3.42	13.33	3
QD676	Wht/Grn		1	16	AM	2018-06-20	2018-06-30	Cage	Live	TRUE	TRUE	10.5				5.96467	4.62667	0.770667	210.1	98.5	4.36	5.93	5.18	3.4	13.33	3
QD736	Wht/Grn		1	16	AM	2018-06-20	2018-07-02	Cage	Live	TRUE	TRUE	12.5				12.1267	9.89	0.816667	227.7	107.4	4.54	6.12	5.34	3.95	13.33	3
QD390	Wht/Prp		1	DLD	PM	2018-06-20	2018-06-23	Cage	Live	TRUE	TRUE	3				1.84267	0.524	0.304333	194.2	84.7	4.33	5.61	4.93	2.72	13.93	16
QD422	Wht/Prp		1	DLD	AM	2018-06-20	2018-06-25	Cage	Live	TRUE	TRUE	5.5				2.936	2.51667	0.857	186.6	79.9	4.2	5.69	4.7	2.88	13.93	16
QD437	Wht/Prp		1	DLD	PM	2018-06-20	2018-06-25	Cage	Live	TRUE	TRUE	5				4.91433	4.11667	0.842333	198.7	83	4.39	5.76	4.75	3.47	13.93	16
QD479	Wht/Prp		1	DLD	PM	2018-06-20	2018-06-26	Cage	Live	TRUE	TRUE	6				9.43	7.75333	0.812	205.9	73.1	4.27	5.28	4.23	2.91	13.93	16
QD480	Wht/Prp		1	DLD	PM	2018-06-20	2018-06-26	Cage	Live	TRUE	TRUE	6				14.4033	12.1433	0.843333	210	90	4.34	5.5	5.08	3.94	13.93	16
QD504	Wht/Prp		1	DLD	PM	2018-06-20	2018-06-27	Cage	Live	TRUE	TRUE	7				6.03133	4.84667	0.795667	205	85.2	4.38	5.57	5.08	3.66	13.93	16
QD535	Wht/Prp		1	DLD	AM	2018-06-20	2018-06-27	Cage	Live	TRUE	TRUE	7.5				11.8633	9.88	0.832	192.5	88.8	4.38	5.72	4.77	3.36	13.93	16
QD574	Wht/Prp		1	DLD	AM	2018-06-20	2018-06-28	Cage	Live	TRUE	TRUE	8.5				8.09667	5.73333	0.709333	191.5	85.1	4.41	5.46	4.57	3.42	13.93	16
QD606	Wht/Prp		1	DLD	PM	2018-06-20	2018-06-28	Cage	Live	TRUE	TRUE	8				3.91	3.11667	0.796	203	86.2	4.33	5.62		3.03	13.93	16
QD638	Wht/Prp		1	DLD	AM	2018-06-20	2018-06-29	Cage	Live	TRUE	TRUE	9.5				9.88167	8.65333	0.873	190.3	88.8	4.31	5.58	5.16	3.82	13.93	16
QD662	Wht/Prp		1	DLD	PM	2018-06-20	2018-06-29	Cage	Live	TRUE	TRUE	9				4.94133	4.26667	0.857333	200.1	96	4.71	5.85	5.26	3.42	13.93	16
QD673	Wht/Prp		1	DLD	AM	2018-06-20	2018-06-30	Cage	Live	TRUE	TRUE	10.5				4.716	3.53	0.744333	173.8	80.8	4.25	5.6		3.09	13.93	16
QD701	Wht/Prp		1	DLD	PM	2018-06-20	2018-06-30	Cage	Live	TRUE	TRUE	10				7.67333	5.34333	0.696667	179.3	84.9	4.39	5.77	5.04	3.21	13.93	16
QD764	Wht/Prp		1	DLD	PM	2018-06-20	2018-07-03	Cage	Live	TRUE	TRUE	13				4.99667	2.93667	0.586667	189	90.9	4.35	5.63	4.94	2.99	13.93	16
QD828	Wht/Prp		1	DLD	AM	2018-06-20	2018-07-07	Cage	Live	TRUE	TRUE	17.5				17.5167	15.0333	0.858	194.9	84.1	4.31	5.43	4.96	4.05	13.93	16
QD888	Wht/Prp		1	DLD	AM	2018-06-20	2018-07-11	Cage	Live	TRUE	TRUE	21.5				11.6833	9.56333	0.819	179.2	84.6	4.43	5.52	4.79	3.56	13.93	16
QD892	Wht/Prp		1	DLD	PM	2018-06-20	2018-07-11	Cage	Live	TRUE	TRUE	21				8.19333	7.06	0.859667	199.5	96.8	4.46	5.72	4.93	3.32	13.93	16
QD350	Wht/Red		1	14	AM	2018-06-20	2018-06-22	Cage	Live	TRUE	TRUE	2.5				1.403	0.600333	0.459	183	82.4	4.27	5.55	4.61	3.1	12.88	21
QD376	Wht/Red		1	14	AM	2018-06-20	2018-06-23	Cage	Live	TRUE	TRUE	3.5				1.42767	0.854667	0.601667	194.3	86.1	4.14	5.68	4.65	2.74	12.88	21
QD388	Wht/Red		1	14	PM	2018-06-20	2018-06-23	Cage	Live	TRUE	TRUE	3				1.08433	0.347667	0.301	189.7	86.3	4.43	5.6	4.55	3.19	12.88	21
QD391	Wht/Red		1	14	PM	2018-06-20	2018-06-23	Cage	Live	TRUE	TRUE	3				4.02667	2.51667	0.607333	210.4	88.7	4.63	5.69	4.52	3.76	12.88	21
QD399	Wht/Red		1	14	PM	2018-06-20	2018-06-24	Cage	Live	TRUE	TRUE	4				2.54233	1.774	0.621333	193.5	91.4	4.36	5.78	4.9	3.05	12.88	21
QD401	Wht/Red		1	14	PM	2018-06-20	2018-06-24	Cage	Live	TRUE	TRUE	4				0.439267	0.181933	0.479	165	84	4.54	5.89	4.45	2.72	12.88	21
QD405	Wht/Red		1	14	AM	2018-06-20	2018-06-24	Cage	Live	TRUE	TRUE	4.5				0.542833	0.302167	0.290333	202	97.5	4.52	5.93	4.82	3.02	12.88	21
QD419	Wht/Red		1	14	AM	2018-06-20	2018-06-25	Cage	Live	TRUE	TRUE	5.5				1.37067	0.858667	0.564333	184.4	81.6	4.38	5.64	4.83	2.82	12.88	21
QD438	Wht/Red		1	14	PM	2018-06-20	2018-06-25	Cage	Live	TRUE	TRUE	5				2.516	1.007	0.392333	174.8	79.6	4.35	5.7	4.82	3.27	12.88	21
QD440	Wht/Red		1	14	PM	2018-06-20	2018-06-25	Cage	Live	TRUE	TRUE	5				2.52433	1.503	0.543	242	93.3	4.38	5.73	5.38	2.97	12.88	21
QD474	Wht/Red		1	14	AM	2018-06-20	2018-06-26	Cage	Live	TRUE	TRUE	6.5				2.25267	1.08333	0.479667	205.5	92.4	4.29	5.81		3.08	12.88	21
QD475	Wht/Red		1	14	AM	2018-06-20	2018-06-26	Cage	Live	TRUE	TRUE	6.5				5.743	4.43667	0.778333	190.4	88.1	4.4	5.8	4.82	3.46	12.88	21
QD478	Wht/Red		1	14	AM	2018-06-20	2018-06-26	Cage	Live	TRUE	TRUE	6.5				0.74	0.406667	0.527667	183.2	88.8	4.33	5.73	5.08	3.23	12.88	21
QD481	Wht/Red		1	14	PM	2018-06-20	2018-06-26	Cage	Live	TRUE	TRUE	6				4.19233	2.62333	0.635333	229	104.4	4.55	5.78	5.22	3.65	12.88	21
QD483	Wht/Red		1	14	PM	2018-06-20	2018-06-26	Cage	Live	TRUE	TRUE	6				2.057	0.660333	0.323333	181.7	87.6	4.41	5.75	4.49	3.5	12.88	21
QD502	Wht/Red		1	14	PM	2018-06-20	2018-06-27	Cage	Live	TRUE	TRUE	7				2.536	1.39867	0.542	210.7	99.9	4.5	5.93	4.9	3.6	12.88	21
QD533	Wht/Red		1	14	AM	2018-06-20	2018-06-27	Cage	Live	TRUE	TRUE	7.5				0.844	0.393	0.456667	171.2	86	4.29	5.56	4.77	2.98	12.88	21
QD571	Wht/Red		1	14	AM	2018-06-20	2018-06-28	Cage	Live	TRUE	TRUE	8.5				1.9138	1.71933	0.869667	203.8	97.8	4.44	5.74	5.12	2.87	12.88	21
QD608	Wht/Red		1	14	PM	2018-06-20	2018-06-28	Cage	Live	TRUE	TRUE	8				2.02333	1.64667	0.813	199.9	98	4.24	5.9	5.23	4.01	12.88	21
QD637	Wht/Red		1	14	AM	2018-06-20	2018-06-29	Cage	Live	TRUE	TRUE	9.5				2.86633	2.01	0.755667	198.8	96.3	4.46	5.7	5.13	3.81	12.88	21
QD660	Wht/Red		1	14	PM	2018-06-20	2018-06-29	Cage	Live	TRUE	TRUE	9				3.37067	2.51667	0.752	195.3	99.4	4.48	5.84	4.88	3.66	12.88	21
QD672	Wht/Red		1	14	AM	2018-06-20	2018-06-30	Cage	Live	TRUE	TRUE	10.5				5.15	1.73667	0.302	195.9	87.1	4.31	5.59	5.1	3.16	12.88	21
QD703	Wht/Red		1	14	PM	2018-06-20	2018-06-30	Cage	Live	TRUE	TRUE	10				3.304	2.84	0.859667	175.4	87.8	4.54	5.75	5.13	3.65	12.88	21
QD710	Wht/Red		1	14	AM	2018-06-20	2018-07-01	Cage	Live	TRUE	TRUE	11.5				9.54333	6.56333	0.697667	181.7	85.3	4.41	5.71	4.81	3.56	12.88	21
QD765	Wht/Red		1	14	PM	2018-06-20	2018-07-03	Cage	Live	TRUE	TRUE	13				0.766667	0.346333	0.452667	167.6	85.6	4.41	5.74	4.94	3.29	12.88	21
QD797	Wht/Red		1	14	PM	2018-06-20	2018-07-04	Cage	Live	TRUE	TRUE	14				1.697	0.896333	0.513333	186.6	92.2	4.38	5.69	5.03	2.81	12.88	21
QD816	Wht/Red		1	14	PM	2018-06-20	2018-07-05	Cage	Live	TRUE	TRUE	15				1.96133	1.53967	0.759667	192.8	91.5	4.56	5.87	5.01	3.22	12.88	21
QD823	Wht/Red		1	14	PM	2018-06-20	2018-07-06	Cage	Live	TRUE	TRUE	16				7.39	4.19667	0.554667	182.6	89	4.54	5.82	3.83	3.49	12.88	21
QD831	Wht/Red		1	14	PM	2018-06-20	2018-07-07	Cage	Live	TRUE	TRUE	17				3.13967	2.07667	0.659	186.1	90.7				3.01	12.88	21
QD929	Wht/Red		1	14	AM	2018-06-20	2018-07-17	Cage	Live	TRUE	TRUE	27.5				2.39433	1.93	0.811	186.9	88.8	4.49	5.68		3.36	12.88	21
QD400	Wht/Wht		1	61	PM	2018-06-20	2018-06-24	Cage	Live	TRUE	TRUE	4				2.02533	1.528	0.706333	175.8	84.3	4.3	5.64	4.71	3.04	13.42	13
QD406	Wht/Wht		1	61	AM	2018-06-20	2018-06-24	Cage	Live	TRUE	TRUE	4.5				0.8707	0.523367	0.522667	182	79.3	4.37	5.74		3.05	13.42	13
QD501	Wht/Wht		1	61	PM	2018-06-20	2018-06-27	Cage	Live	TRUE	TRUE	7				9.12667	6.42	0.628	200.7	94.4	4.39	5.7		2.48	13.42	13
QD537	Wht/Wht		1	61	AM	2018-06-20	2018-06-27	Cage	Live	TRUE	TRUE	7.5				2.04033	1.312	0.642333	172.1	88.9	4.32	5.78		2.95	13.42	13
QD573	Wht/Wht		1	61	AM	2018-06-20	2018-06-28	Cage	Live	TRUE	TRUE	8.5				8.99433	7.93333	0.877333	194.6	90.4	4.4	5.61	4.81	3.28	13.42	13
QD610	Wht/Wht		1	61	PM	2018-06-20	2018-06-28	Cage	Live	TRUE	TRUE	8				8.92	6.87	0.765333	214.8	96.9	4.42	5.78		4.17	13.42	13
QD640	Wht/Wht		1	61	AM	2018-06-20	2018-06-29	Cage	Live	TRUE	TRUE	9.5				3.054	2.03667	0.686667	215.7	96.1	4.53	5.82		3.18	13.42	13
QD663	Wht/Wht		1	61	PM	2018-06-20	2018-06-29	Cage	Live	TRUE	TRUE	9				6.07767	4.75667	0.766333	213	96.5	4.52	5.88		3.21	13.42	13
QD674	Wht/Wht		1	61	AM	2018-06-20	2018-06-30	Cage	Live	TRUE	TRUE	10.5				1.0642	0.4614	0.3812	198.1	92.1	4.34	5.53		3.16	13.42	13
QD698	Wht/Wht		1	61	PM	2018-06-20	2018-06-30	Cage	Live	TRUE	TRUE	10				8.388	7.59333	0.899333	190.9	98.3	4.31	5.79		3.5	13.42	13
QD700	Wht/Wht		1	61	PM	2018-06-20	2018-06-30	Cage	Live	TRUE	TRUE	10				5.63333	2.49	0.432333	180	87.6	4.29	5.59		2.5	13.42	13
QD735	Wht/Wht		1	61	AM	2018-06-20	2018-07-02	Cage	Live	TRUE	TRUE	12.5				2.303	1.61467	0.669	205.4	87.1	4.34	5.76		2.95	13.42	13
QD749	Wht/Wht		1	61	PM	2018-06-20	2018-07-02	Cage	Live	TRUE	TRUE	12				6.54667	3.81	0.553	192.6	92.2	4.39	5.84		2.9	13.42	13
QD763	Wht/Wht		1	61	PM	2018-06-20	2018-07-03	Cage	Live	TRUE	TRUE	13				6.82333	5.24667	0.761667	178.3	89.9	4.24	5.56		2.71	13.42	13
QD778	Wht/Wht		1	61	AM	2018-06-20	2018-07-04	Cage	Live	TRUE	TRUE	14.5				6.90267	0.226	0.0326667	198.7	97.2	4.37	5.79		2.86	13.42	13
QD795	Wht/Wht		1	61	PM	2018-06-20	2018-07-04	Cage	Live	TRUE	TRUE	14				15.46	10.7467	0.678	192.9	89.8	4.32	5.75	5.06	3.3	13.42	13
QD815	Wht/Wht		1	61	PM	2018-06-20	2018-07-05	Cage	Live	TRUE	TRUE	15				7.47533	6.37667	0.853	192.3	89.2	4.3	5.7	4.53	3.21	13.42	13
QD832	Wht/Wht		1	61	PM	2018-06-20	2018-07-07	Cage	Live	TRUE	TRUE	17				7.24	4.74	0.667	206.2	93.5	4.31	5.83		3.5	13.42	13
QD844	Wht/Wht		1	61	AM	2018-06-20	2018-07-08	Cage	Live	TRUE	TRUE	18.5				2.58967	1.79667	0.707333	171.1	86.4	4.32	5.98	4.74	2.83	13.42	13
QD858	Wht/Wht		1	61	PM	2018-06-20	2018-07-08	Cage	Live	TRUE	TRUE	18				5.22	3.11333	0.587667	186.1	88.5	4.42	5.62	5.39	3.66	13.42	13
QD894	Wht/Wht		1	61	PM	2018-06-20	2018-07-12	Cage	Live	TRUE	TRUE	22				4.287	3.63	0.853667	204.6	94.9	4.4	5.84	4.91	3.09	13.42	13
QD903	Wht/Wht		1	61	AM	2018-06-20	2018-07-12	Cage	Live	TRUE	TRUE	22.5				6.123	5.33	0.87	190.8	92	4.42	5.93	5.26	2.83	13.42	13
QD920	Wht/Wht		1	61	PM	2018-06-20	2018-07-14	Cage	Live	TRUE	TRUE	24				4.11467	3.42667	0.831333	187.9	85.8	4.52	5.61	4.93	2.41	13.42	13
QD378	Wht/Yel		1	32	AM	2018-06-20	2018-06-23	Cage	Live	TRUE	TRUE	3.5				1.54267	1.22667	0.785667	224.4	95	4.44	5.59	5.17	3.69	13.27	9
QD423	Wht/Yel		1	32	AM	2018-06-20	2018-06-25	Cage	Live	TRUE	TRUE	5.5				3.43167	3.05667	0.876333	194.5	83.3	4.39	5.3	4.95	3.77	13.27	9
QD439	Wht/Yel		1	32	PM	2018-06-20	2018-06-25	Cage	Live	TRUE	TRUE	5				8.15	7.05667	0.865	244.8	105.9	4.33	5.49		3.46	13.27	9
QD499	Wht/Yel		1	32	PM	2018-06-20	2018-06-27	Cage	Live	TRUE	TRUE	7				6.91667	5.40667	0.776	234.1	102.5	4.44	5.78	4.74	3.31	13.27	9
QD538	Wht/Yel		1	32	AM	2018-06-20	2018-06-27	Cage	Live	TRUE	TRUE	7.5				4.87133	3.48667	0.696333	184.2	85.4	4.55	5.64	4.75	2.79	13.27	9
QD639	Wht/Yel		1	32	AM	2018-06-20	2018-06-29	Cage	Live	TRUE	TRUE	9.5				12.0263	10.8433	0.897	180.1	84.6	4.37	5.49	5.2	3.51	13.27	9
QD734	Wht/Yel		1	32	AM	2018-06-20	2018-07-02	Cage	Live	TRUE	TRUE	12.5				14.7067	11.2333	0.764333	178.4	80.8	4.31	5.48	5.2	3.62	13.27	9
QD857	Wht/Yel		1	32	PM	2018-06-20	2018-07-08	Cage	Live	TRUE	TRUE	18				8.44333	6.37	0.754	169.6	84.8	4.54	5.68	5.24	3.83	13.27	9
QD651	Yel/Blu		1	71	AM	2018-06-23	2018-06-29	Cage	Live	TRUE	TRUE	6.5				12.29	7.34333	0.582	252.9	99.9	4.36	5.84		3.8	12.98	4
QD653	Yel/Blu		1	71	PM	2018-06-23	2018-06-29	Cage	Live	TRUE	TRUE	6				9.62333	8.41	0.873333	237.7	100.4	4.45	5.88	5.02	4.07	12.98	4
QD691	Yel/Blu		1	71	AM	2018-06-23	2018-06-30	Cage	Live	TRUE	TRUE	7.5				11.27	9.78667	0.867667	210	95.5	4.32	5.72	4.06	5.05	12.98	4
QD739	Yel/Blu		1	71	AM	2018-06-23	2018-07-02	Cage	Live	TRUE	TRUE	9.5				11.45	8.34667	0.730333	195.6	94.4	4.54	5.61	5.23	3.66	12.98	4
QD751	Yel/Blu		1	71	PM	2018-06-23	2018-07-02	Cage	Live	TRUE	TRUE	9				13.83	11.4667	0.829	203.8	91	4.37	5.82	5.03	3.82	12.98	4
QD754	Yel/Blu		1	71	AM	2018-06-23	2018-07-03	Cage	Live	TRUE	TRUE	10.5				14.3667	10.9667	0.763667	212.6	100.9	4.45	5.88	5.19	3.96	12.98	4
QD774	Yel/Blu		1	71	PM	2018-06-23	2018-07-03	Cage	Live	TRUE	TRUE	10				15.25	12.4333	0.814667	199.8	97.4	4.39	5.47	5.36	3.97	12.98	4
QD786	Yel/Blu		1	71	AM	2018-06-23	2018-07-04	Cage	Live	TRUE	TRUE	11.5				14.8603	13.5	0.904333	215	96.7	4.36	5.85	4.97	4.06	12.98	4
QD800	Yel/Blu		1	71	PM	2018-06-23	2018-07-04	Cage	Live	TRUE	TRUE	11				12.2757	11.38	0.928667	198.1	95.1	4.49	5.69	5.07	4.28	12.98	4
QD803	Yel/Blu		1	71	AM	2018-06-23	2018-07-05	Cage	Live	TRUE	TRUE	12.5				5.24533	3.74667	0.727333	192.4	89.5	4.42	5.76	4.88	4.26	12.98	4
QD820	Yel/Blu		1	71	PM	2018-06-23	2018-07-05	Cage	Live	TRUE	TRUE	12				13.0867	8.91333	0.679333	213.1	92.3	4.38	5.57	5.02	3.99	12.98	4
QD839	Yel/Blu		1	71	PM	2018-06-23	2018-07-07	Cage	Live	TRUE	TRUE	14				14.24	12.9667	0.909667	199.5	94.9	4.6	5.99	5.17	4.01	12.98	4
QD850	Yel/Blu		1	71	AM	2018-06-23	2018-07-08	Cage	Live	TRUE	TRUE	15.5				13.49	11.1	0.823667	209.5	93.7	4.48	5.83	5.22	3.81	12.98	4
QD860	Yel/Blu		1	71	PM	2018-06-23	2018-07-08	Cage	Live	TRUE	TRUE	15				9.22333	6.07333	0.656667	255.2	98.6	4.43	5.78	5.33	3.63	12.98	4
QD883	Yel/Blu		1	71	PM	2018-06-23	2018-07-10	Cage	Live	TRUE	TRUE	17				7.8	6.18333	0.784667	200.7	93.2	4.44	5.78	5.03	3.13	12.98	4
QD885	Yel/Blu		1	71	PM	2018-06-23	2018-07-10	Cage	Live	TRUE	TRUE	17				5.34667	1.99667	0.372333	263.4	99.1	4.53	5.78		2.99	12.98	4
QD941	Yel/Blu		1	71	AM	2018-06-23	2018-07-22	Cage	Live	TRUE	TRUE	29.5				11.0757	10.0167	0.901667	173	83.3	4.39	5.77	5.11	4.13	12.98	4
QD942	Yel/Blu		1	71	AM	2018-06-23	2018-07-22	Cage	Live	TRUE	TRUE	29.5				11.3823	10.0333	0.881333	199.5	92.5	4.41	5.8	5.36	3.96	12.98	4
QD476	Yel/Grn		1	16	AM	2018-06-23	2018-06-26	Cage	Live	TRUE	TRUE	3.5				3.37667	1.72	0.502333	237.3	98.5	4.38	5.76	5.3	3.34	13.33	3
QD586	Yel/Grn		1	16	PM	2018-06-23	2018-06-28	Cage	Live	TRUE	TRUE	5				6.448	5.09667	0.776667	196.7	92.9	4.48	5.52	4.58	2.79	13.33	3
QD722	Yel/Grn		1	16	AM	2018-06-23	2018-07-01	Cage	Live	TRUE	TRUE	8.5				7.71133	6.84333	0.885667	200	101.2	4.53	6.2	5.02	3.44	13.33	3
QD693	Yel/Prp		1	DLD	AM	2018-06-23	2018-06-30	Cage	Live	TRUE	TRUE	7.5				18.49	13.1	0.705	186.7	85	4.45	5.73	5.33	4.09	13.93	16
QD720	Yel/Prp		1	DLD	AM	2018-06-23	2018-07-01	Cage	Live	TRUE	TRUE	8.5				4.01	3.02	0.757333	184.1	87	4.42	5.8	4.3	3.74	13.93	16
QD737	Yel/Prp		1	DLD	AM	2018-06-23	2018-07-02	Cage	Live	TRUE	TRUE	9.5				15.4	11.8667	0.78	215.8	93.3	4.45	5.66	4.88	3.91	13.93	16
QD750	Yel/Prp		1	DLD	PM	2018-06-23	2018-07-02	Cage	Live	TRUE	TRUE	9				7.41667	5.04	0.679667	196.7	93.3	4.3	5.7	4.51	3.46	13.93	16
QD777	Yel/Prp		1	DLD	PM	2018-06-23	2018-07-03	Cage	Live	TRUE	TRUE	10				15.71	12.8667	0.820333	199.1	91.9	4.44	5.85	5.28	3.66	13.93	16
QD819	Yel/Prp		1	DLD	PM	2018-06-23	2018-07-05	Cage	Live	TRUE	TRUE	12				11.5017	9.33	0.817333	190.8	90.6			4.86	3.38	13.93	16
QD565	Yel/Red		1	14	AM	2018-06-23	2018-06-28	Cage	Live	TRUE	TRUE	5.5				2.3398	0.70755	0.2575	220.4	91.1	4.36	5.7		3.67	12.88	21
QD837	Yel/Red		1	14	PM	2018-06-23	2018-07-07	Cage	Live	TRUE	TRUE	14				0.438867	0.271667	0.612667	201.4	93.1	4.59	5.89	4.86	3.11	12.88	21
QD357	Yel/Wht		1	61	AM	2018-06-23	2018-06-23	Cage	Live	TRUE	TRUE	0.5				0.981933	0.2736	0.265333	150.5	62.7			3.21	2.94	13.42	13
QD477	Yel/Wht		1	61	AM	2018-06-23	2018-06-26	Cage	Live	TRUE	TRUE	3.5				1.62667	0.679667	0.371667	208.3	87.5	4.17	5.43		2.94	13.42	13
QD484	Yel/Wht		1	61	PM	2018-06-23	2018-06-27	Cage	Live	TRUE	TRUE	4				5.66033	4.47733	0.66	213.2	93.4	4.23	5.58		3.25	13.42	13
QD522	Yel/Wht		1	61	AM	2018-06-23	2018-06-27	Cage	Live	TRUE	TRUE	4.5				2.73567	1.95167	0.654667	180.3	83.3	4.22	5.65		2.79	13.42	13
QD546	Yel/Wht		1	61	AM	2018-06-23	2018-06-28	Cage	Live	TRUE	TRUE	5.5				5.34333	3.41667	0.592333	198.5	91.7	4.54	5.94			13.42	13
QD563	Yel/Wht		1	61	AM	2018-06-23	2018-06-28	Cage	Live	TRUE	TRUE	5.5				0.7996	0.303933	0.362333	193.9	84	4.17	5.63		3	13.42	13
QD564	Yel/Wht		1	61	AM	2018-06-23	2018-06-28	Cage	Live	TRUE	TRUE	5.5				0.963	0.258	0.272333	205.7	88.5	4.29	5.72	5.49	2.92	13.42	13
QD652	Yel/Wht		1	61	AM	2018-06-23	2018-06-29	Cage	Live	TRUE	TRUE	6.5				6.04267	4.9	0.799333	193.7	82.7	4.24	5.31		3.21	13.42	13
QD690	Yel/Wht		1	61	AM	2018-06-23	2018-06-30	Cage	Live	TRUE	TRUE	7.5				5.08767	4.29333	0.841333	173.3	84.5	4.24	5.61		2.82	13.42	13
QD721	Yel/Wht		1	61	AM	2018-06-23	2018-07-01	Cage	Live	TRUE	TRUE	8.5				3.314	2.71667	0.815667	175.7	83.2	4.39	5.56		3.26	13.42	13
QD726	Yel/Wht		1	61	PM	2018-06-23	2018-07-01	Cage	Live	TRUE	TRUE	8				6.78333	4.52333	0.626	174.6	84.1	4.24	5.54		2.88	13.42	13
QD738	Yel/Wht		1	61	AM	2018-06-23	2018-07-02	Cage	Live	TRUE	TRUE	9.5				3.19667	1.60667	0.501	191.9	91.3	4.44	5.68	4.88	3.19	13.42	13
QD755	Yel/Wht		1	61	AM	2018-06-23	2018-07-03	Cage	Live	TRUE	TRUE	10.5				13.16	11	0.836667	179	82.4	4.25	5.61	5.13	3.54	13.42	13
QD775	Yel/Wht		1	61	PM	2018-06-23	2018-07-03	Cage	Live	TRUE	TRUE	10				12.4403	9.80667	0.795333	184.7	84.9	4.32	5.62		3.36	13.42	13
QD787	Yel/Wht		1	61	AM	2018-06-23	2018-07-04	Cage	Live	TRUE	TRUE	11.5				7.65	6.23333	0.808	185.2	85.1	4.28	5.73		3.12	13.42	13
QD801	Yel/Wht		1	61	PM	2018-06-23	2018-07-04	Cage	Live	TRUE	TRUE	11				3.99333	2.62667	0.653333	188.1	85.8	4.33	5.54	5.03	3.22	13.42	13
QD802	Yel/Wht		1	61	AM	2018-06-23	2018-07-05	Cage	Live	TRUE	TRUE	12.5				2.20333	0.95	0.406667	185.9	85.7	4.26	5.73		2.86	13.42	13
QD818	Yel/Wht		1	61	PM	2018-06-23	2018-07-05	Cage	Live	TRUE	TRUE	12				12.8867	9.96667	0.764667	189.9	85.9	4.27	5.57		3.46	13.42	13
QD821	Yel/Wht		1	61	PM	2018-06-23	2018-07-06	Cage	Live	TRUE	TRUE	13				5.38633	4.14667	0.771667	197.8	96	4.47	5.79	5.11	2.86	13.42	13
QD826	Yel/Wht		1	61	AM	2018-06-23	2018-07-07	Cage	Live	TRUE	TRUE	14.5				6.27733	5.57333	0.883667	163.2	79.1	4.26	5.47		2.82	13.42	13
QD838	Yel/Wht		1	61	PM	2018-06-23	2018-07-07	Cage	Live	TRUE	TRUE	14				0.621	0.241333	0.374667	190.2	93.8	4.42	5.74	5.04	1.89	13.42	13
QD851	Yel/Wht		1	61	AM	2018-06-23	2018-07-08	Cage	Live	TRUE	TRUE	15.5				6.10333	4.29667	0.686667	192	86.6	4.41	5.56	5.7	3.66	13.42	13
QD859	Yel/Wht		1	61	PM	2018-06-23	2018-07-08	Cage	Live	TRUE	TRUE	15				4.45133	3.46	0.777	180.4	84	4.45	5.69		3.09	13.42	13
QD875	Yel/Wht		1	61	AM	2018-06-23	2018-07-09	Cage	Live	TRUE	TRUE	16.5				7.52667	4.51	0.59	170.3	81.6	4.25	5.6			13.42	13
QD882	Yel/Wht		1	61	PM	2018-06-23	2018-07-10	Cage	Live	TRUE	TRUE	17				1.32367	0.936	0.711333	181.2	86.2	4.45	5.63		2.75	13.42	13
QD889	Yel/Wht		1	61	AM	2018-06-23	2018-07-11	Cage	Live	TRUE	TRUE	18.5				3.48767	2.79667	0.798	218.4	94.3	4.56	5.73	5.18	3.14	13.42	13
QD890	Yel/Wht		1	61	PM	2018-06-23	2018-07-11	Cage	Live	TRUE	TRUE	18				2.83467	2.44333	0.879667	184.1	90.6	4.23	5.53	5	3.35	13.42	13
QD899	Yel/Wht		1	61	PM	2018-06-23	2018-07-12	Cage	Live	TRUE	TRUE	19				7.595	6.68333	0.881333	183.9	86.7	4.3	5.78	5.01	3.38	13.42	13
QD901	Yel/Wht		1	61	AM	2018-06-23	2018-07-12	Cage	Live	TRUE	TRUE	19.5				8.88667	7.29	0.811333	156.7	75	4.21	5.43		2.84	13.42	13
QD905	Yel/Wht		1	61	AM	2018-06-23	2018-07-12	Cage	Live	TRUE	TRUE	19.5				4.97933	4.17	0.828667	173.4	82.6	4.49	5.77		3.26	13.42	13
QD910	Yel/Wht		1	61	AM	2018-06-23	2018-07-12	Cage	Live	TRUE	TRUE	19.5				7.851	7.05667	0.901667	199.6	82.3	4.31	5.66	4.89	3.08	13.42	13
QD918	Yel/Wht		1	61	AM	2018-06-23	2018-07-13	Cage	Live	TRUE	TRUE	20.5				4.72467	3.83667	0.817	176.2	87.1	4.37	5.6		2.96	13.42	13
QD923	Yel/Wht		1	61	PM	2018-06-23	2018-07-15	Cage	Live	TRUE	TRUE	22				4.19233	3.47333	0.836667	196	95	4.38	5.74	4.92	2.94	13.42	13
QD925	Yel/Wht		1	61	PM	2018-06-23	2018-07-16	Cage	Live	TRUE	TRUE	23				8.72933	7.08333	0.805333	191.7	95.8	4.58	5.9		3.35	13.42	13
QD926	Yel/Wht		1	61	PM	2018-06-23	2018-07-16	Cage	Live	TRUE	TRUE	23				0.378067	0.182067	0.471667	173.2	87.2	4.34	5.77		3.2	13.42	13
QD928	Yel/Wht		1	61	PM	2018-06-23	2018-07-17	Cage	Live	TRUE	TRUE	24				6.13	4.5	0.711	188.5	89	4.26	5.61	4.41	3.08	13.42	13
QD933	Yel/Wht		1	61	PM	2018-06-23	2018-07-18	Cage	Live	TRUE	TRUE	25				13.11	10.6	0.812333	188.8	90.3	4.36	5.79	5.56	3.76	13.42	13
QD939	Yel/Wht		1	61	AM	2018-06-23	2018-07-20	Cage	Live	TRUE	TRUE	27.5				8.083	6.73667	0.846	180.5	86.6	4.37	5.69	4.85	3.79	13.42	13
QD940	Yel/Wht		1	61	AM	2018-06-23	2018-07-21	Cage	Live	TRUE	TRUE	28.5				5.99133	5.17	0.869667	177	86.1	4.37	5.66	4.9	3.11	13.42	13
QD692	Yel/Yel		1	32	AM	2018-06-23	2018-06-30	Cage	Live	TRUE	TRUE	7.5				13.5167	11.8667	0.878333	202.4	92.7	4.43	5.73	4.9	4.24	13.27	9
QD752	Yel/Yel		1	32	PM	2018-06-23	2018-07-02	Cage	Live	TRUE	TRUE	9				8.362	6.25667	0.753667	189.6	79.9	4.3	5.43	4.69	3.38	13.27	9
QD776	Yel/Yel		1	32	PM	2018-06-23	2018-07-03	Cage	Live	TRUE	TRUE	10				17.3387	14.5667	0.847667	194.2	94.5	4.48	5.77	4.58	3.31	13.27	9
QD840	Yel/Yel		1	32	PM	2018-06-23	2018-07-07	Cage	Live	TRUE	TRUE	14				14.8933	12.2333	0.822	249.3	137.2	4.58	5.69		4.06	13.27	9
QD877	Yel/Yel		1	32	PM	2018-06-23	2018-07-09	Cage	Live	TRUE	TRUE	16				7.94033	6.01	0.759667	182.2	86.2	4.4	5.58	5.19	3.16	13.27	9
QD895	Yel/Yel		1	32	PM	2018-06-23	2018-07-12	Cage	Live	TRUE	TRUE	19				4.963	4.23333	0.858333	205.9	84.6	4.5	5.65	5.31	3.3	13.27	9
	G1	8	1	DLD	AM	2018-06-22	2018-07-01	Cage	Dead	TRUE	FALSE	9.5	251.4	4.33242	5.58242										13.93	16
	G10	113	1	DLD	AM	2018-06-22	2018-07-02	Cage	Dead	TRUE	FALSE	10.5	241.2	4.30495	4.96978										13.93	16
	G11	39	1	DLD	AM	2018-06-22	2018-06-27	Cage	Dead	TRUE	FALSE	5.5	219.3	4.34066	5.62637										13.93	16
QD847	G12	40	1	DLD	AM	2018-06-22	2018-07-08	Cage	Live	TRUE	TRUE	16.5	220.6	4.21978	5.51099	14.02	12.3333	0.879667	211.7	95.6	4.41	5.71	5.03	3.83	13.93	16
QD847	G12	58	1	DLD	AM	2018-06-22	2018-07-08	Cage	Live	TRUE	TRUE	16.5	231.3	4.21978	5.51099	14.02	12.3333	0.879667	211.7	95.6	4.41	5.71	5.03	3.83	13.93	16
	G13	143	1	DLD	AM	2018-06-22	2018-06-30	Cage	Dead	TRUE	FALSE	8.5	208	4.03571	5.27198										13.93	16
QD780	G14	56	1	DLD	AM	2018-06-22	2018-07-04	Cage	Live	TRUE	TRUE	12.5	214.3	4.35165	5.32143	4.767	1.77367	0.358333	238.8	95.7	4.49	5.65	5.06	3.25	13.93	16
	G15	68	1	DLD	AM	2018-06-22		Lost		FALSE	FALSE		259.8	4.35714	5.54121										13.93	16
QD687	G16	151	1	DLD	AM	2018-06-22	2018-06-30	Cage	Live	TRUE	TRUE	8.5	234.5	4.38736	5.67857	7.26	3.86	0.553667	209.5	97.6	4.43	5.54		3.66	13.93	16
	G17	96	1	14	AM	2018-06-22	2018-07-02	Cage	Dead	TRUE	FALSE	10.5	254	4.49176	5.46429										12.88	21
	G18	182	1	14	AM	2018-06-22	2018-06-24	Cage	Dead	TRUE	FALSE	2.5	230.8	4.48901	4.98626										12.88	21
	G19	41	1	14	AM	2018-06-22	2018-06-23	Trap		FALSE	FALSE	1.5	207.7	4.31868	5.64286										12.88	21
	G20	62	1	14	AM	2018-06-22	2018-07-01	Cage	Dead	TRUE	FALSE	9.5	236.4	4.40659	5.65385										12.88	21
	G21	177	1	14	AM	2018-06-22	2018-06-28	Cage	Dead	TRUE	FALSE	6.5	220.4	4.42033	5.75824										12.88	21
	G22	171	1	14	AM	2018-06-22	2018-06-23	Trap		FALSE	FALSE	1.5	222.1	4.4533	5.89286										12.88	21
QD552	G23	67	1	DLD	AM	2018-06-22	2018-06-28	Cage	Live	TRUE	TRUE	6.5	223.8	4.33791	5.11538	7.3	5.05333	0.693667	219.8	93.2	4.42	5.53	4.9	3.14	13.93	16
	G24	199	1	DLD	AM	2018-06-22		Lost		FALSE	FALSE		222.3	4.24725	5.0522										13.93	16
	G25	83	1	DLD	AM	2018-06-22	2018-07-01	Cage	Dead	TRUE	FALSE	9.5	259.6	4.42857	5.53297										13.93	16
	G26	48	1	DLD	AM	2018-06-22		Lost		FALSE	FALSE		229.9	4.14835	4.93681										13.93	16
QD625	G27	138	1	DLD	AM	2018-06-22	2018-06-29	Cage	Live	TRUE	TRUE	7.5	248.2	4.45879	5.59066	13.6153	11.2667	0.833	220.1	104.7	4.49	5.72	4.8	3.27	13.93	16
	G28	49	1	DLD	AM	2018-06-22		Lost		FALSE	FALSE		245.5	4.41209	5.32418										13.93	16
QD688	G29	156	1	DLD	AM	2018-06-22	2018-06-30	Cage	Live	TRUE	TRUE	8.5	224	4.30495	5.53297	9.57333	7.74333	0.807	180.5	89.2	4.41	5.52			13.93	16
	G3	148	1	14	AM	2018-06-22	2018-06-25	Trap		FALSE	FALSE	3.5	210.1	4.51923	5.8022										12.88	21
QD626	G30	126	1	DLD	AM	2018-06-22	2018-06-29	Cage	Live	TRUE	TRUE	7.5	256.3	4.53297	5.76648	7.00587	6.36	0.912	221.7	104.9	4.46	5.85	5.06	3.6	13.93	16
QD553	G31	142	1	DLD	AM	2018-06-22	2018-06-28	Cage	Live	TRUE	TRUE	6.5	228.1	4.34341	5.56593	12.8967	8.48333	0.658	215	96.9	4.49	5.49	4.85	3.65	13.93	16
QD779	G32	109	1	DLD	AM	2018-06-22	2018-07-04	Cage	Live	TRUE	TRUE	12.5	235.5	4.34615	5.56044	13.27	4.83667	0.363667	192.8	91.4	4.35	5.71	4.92	3.74	13.93	16
	G33	24	1	DLD	AM	2018-06-22	2018-06-23	Trap		FALSE	FALSE	1.5	255.9	4.3489	5.41209										13.93	16
	G34	117	1	14	AM	2018-06-22		Lost		FALSE	FALSE		245.8	4.39011	5.49176										12.88	21
	G35	202	1	14	AM	2018-06-22	2018-06-27	Cage	Dead	TRUE	FALSE	5.5	228.8	4.3956	5.59066										12.88	21
QD689	G36	99	1	14	AM	2018-06-22	2018-06-30	Cage	Live	TRUE	TRUE	8.5	257.4	4.5989	5.88462	0.570233	0.149567	0.166667	227.4	110.4	4.58	5.85			12.88	21
	G37	36	1	14	AM	2018-06-22	2018-06-24	Cage	Dead	TRUE	FALSE	2.5	244.3	4.53571	5.77198										12.88	21
	G37	206	1	14	AM	2018-06-22	2018-06-24	Cage	Dead	TRUE	FALSE	2.5	227.3	4.53571	5.77198										12.88	21
	G39	47	1	14	AM	2018-06-22	2018-06-22	Introduction		FALSE	FALSE	0.5	213.5	4.61813	5.64286										12.88	21
QD616	G4	141	1	14	AM	2018-06-22	2018-06-29	Cage	Live	TRUE	TRUE	7.5	230.5	4.49725	5.64011	0.64445	0.18145	0.206	191.9	96.4	4.49	5.81	4.94	3.09	12.88	21
	G40	107	1	14	AM	2018-06-22	2018-06-25	Trap		FALSE	FALSE	3.5	244.2	4.44231	5.71154										12.88	21
	G41	191	1	14	AM	2018-06-22	2018-07-01	Cage	Dead	TRUE	FALSE	9.5	215.9	4.56319	5.67033										12.88	21
	G42	21	1	14	AM	2018-06-22		Lost		FALSE	FALSE		212	4.33516	5.07692										12.88	21
	G43	183	1	14	AM	2018-06-22	2018-06-23	Trap		FALSE	FALSE	1.5	211.4	4.51099	5.75										12.88	21
	G44	114	1	14	AM	2018-06-22	2018-06-25	Trap		FALSE	FALSE	3.5	227.8	4.3956	5.64286										12.88	21
	G45	52	1	14	AM	2018-06-22	2018-06-25	Trap		FALSE	FALSE	3.5	232.7	4.51099	5.71154										12.88	21
	G46	71	1	14	AM	2018-06-22	2018-06-23	Trap		FALSE	FALSE	1.5	185	4.47802	5.49176										12.88	21
QD413	G47	127	1	14	AM	2018-06-22	2018-06-25	Cage	Live	TRUE	TRUE	3.5	248.7	4.34615	5.53022	5.32367	4.15333	0.725	243.5	102.4	4.28	5.67	4.97	3.3	12.88	21
QD519	G48	19	1	14	AM	2018-06-22	2018-06-27	Cage	Live	TRUE	TRUE	5.5	239.4	4.2967	5.80769	2.753	1.44267	0.480667	223.4	103.2	4.48	5.74	4.8	3.47	12.88	21
QD914	G49	130	1	14	AM	2018-06-22	2018-07-12	Cage	Live	TRUE	TRUE	20.5	241.9	4.39286	5.47802	10.928	9.71667	0.893	207.8	98.8	4.48	5.98	5.26	3.78	12.88	21
	G5	65	1	14	AM	2018-06-22		Lost		FALSE	FALSE		207.1	4.51923	5.61813										12.88	21
	G50	140	1	14	AM	2018-06-22		Lost		FALSE	FALSE		232.7	4.46978	5.60165										12.88	21
	G51	112	1	14	AM	2018-06-22	2018-06-27	Cage	Dead	TRUE	FALSE	5.5	243.7	4.35989	5.70879										12.88	21
	G52	106	1	14	AM	2018-06-22	2018-06-23	Trap		FALSE	FALSE	1.5	274.1	4.56044	5.98352										12.88	21
	G53	178	1	14	AM	2018-06-22	2018-07-18	Cage	Dead	TRUE	FALSE	26.5	256.4	4.39011	5.80495										12.88	21
	G54	97	1	14	AM	2018-06-22	2018-06-26	Trap		FALSE	FALSE	4.5	275.7	4.36538	5.89286										12.88	21
QD717	G55	131	1	14	AM	2018-06-22	2018-07-01	Cage	Live	TRUE	TRUE	9.5	263.9	4.39286	5.72253	6.21	4.55	0.733	212.1	96.6	4.41	5.81	4.45	3.74	12.88	21
	G56	80	1	14	AM	2018-06-22		Lost		FALSE	FALSE		205.5	4.27747	5.32143										12.88	21
	G57	154	1	61	AM	2018-06-22	2018-06-22	Introduction		FALSE	FALSE	0.5	194.2	4.18681	4.88462										13.42	13
	G58	211	1	61	AM	2018-06-22	2018-06-27	Cage	Dead	TRUE	FALSE	5.5	190.9	4.33516	5.32418										13.42	13
QD358	G59	173	1	61	AM	2018-06-22	2018-06-23	Cage	Live	TRUE	TRUE	1.5	167.5	4.10714	5.12088	0.829433	0.196433	0.240333	150.8	71.7	3.95	5.12	3.77	3.25	13.42	13
	G6	210	1	14	AM	2018-06-22		Lost		FALSE	FALSE		236	4.33516	5.51099										12.88	21
	G60	186	1	61	AM	2018-06-22	2018-06-23	Trap		FALSE	FALSE	1.5	185.5	4.12912	5.07143										13.42	13
	G61	176	1	61	AM	2018-06-22	2018-06-23	Trap		FALSE	FALSE	1.5	188.6	4.26923	5.47802										13.42	13
	G62	103	1	61	AM	2018-06-22	2018-07-04	Cage	Dead	TRUE	FALSE	12.5	203.7	4.23901	5.4478										13.42	13
	G63	73	1	61	AM	2018-06-22	2018-07-01	Cage	Dead	TRUE	FALSE	9.5	210.2	4.3489	5.5989										13.42	13
	G64	180	1	61	AM	2018-06-22	2018-06-26	Trap		FALSE	FALSE	4.5	186.8	4.10714	5.34066										13.42	13
	G65	128	1	61	AM	2018-06-22	2018-06-27	Cage	Dead	TRUE	FALSE	5.5	186.7	4.23626	5.3544										13.42	13
QD620	G66	13	1	61	AM	2018-06-22	2018-06-29	Cage	Live	TRUE	TRUE	7.5	198.2	4.07418	5.33242	0	0	0	189.7	77.9	4.18	5.54			13.42	13
QD781	G67	30	1	61	AM	2018-06-22	2018-07-04	Cage	Live	TRUE	TRUE	12.5	217.2	4.17582	5.34615	3.16033	2.05333	0.652333	180.3	89.2	4.33	5.58	4.76	2.75	13.42	13
	G68	214	1	61	AM	2018-06-22	2018-06-22	Introduction		FALSE	FALSE	0.5	202	4.24176	5.51648										13.42	13
	G69	201	1	61	AM	2018-06-22		Lost		FALSE	FALSE		204.5	4.31593	5.57967										13.42	13
QD516	G7	17	1	DLD	AM	2018-06-22	2018-06-27	Cage	Live	TRUE	TRUE	5.5	190.5	4.35714	5.72802	1.278	0.660667	0.466667	159.5	72.7	4.27	5.71	4.68	2.89	13.93	16
	G70	88	1	61	AM	2018-06-22		Lost		FALSE	FALSE		220.2	4.24176	5.43407										13.42	13
	G71	35	1	61	AM	2018-06-22	2018-06-23	Trap		FALSE	FALSE	1.5	200.6	4.31044	5.42033										13.42	13
QD913	G72	91	1	61	AM	2018-06-22	2018-07-12	Cage	Live	TRUE	TRUE	20.5	201.8	4.08242	5.36538	0.855433	0.719333	0.842	179.3	86.6	4.29	5.63		3.26	13.42	13
	G73	166	1	61	AM	2018-06-22	2018-06-27	Trap		FALSE	FALSE	5.5	210.4	4.29945	5.46154										13.42	13
	G74	33	1	61	AM	2018-06-22		Lost		FALSE	FALSE		216.3	4.24451	5.46703										13.42	13
	G76	31	1	61	AM	2018-06-22	2018-06-25	Trap		FALSE	FALSE	3.5	179.6	4.21703	5.21429										13.42	13
	G76	119	1	61	AM	2018-06-22	2018-06-25	Trap		FALSE	FALSE	3.5	205.4	4.21703	5.21429										13.42	13
QD623	G77	14	1	61	AM	2018-06-22	2018-06-29	Cage	Live	TRUE	TRUE	7.5	211	4.30495	5.71154	1.56267	0.398	0.257667	194.2	94	4.37	5.88		3	13.42	13
QD758	G78	136	1	61	AM	2018-06-22	2018-07-03	Cage	Live	TRUE	TRUE	11.5	205.7	4.27747	5.46978	6.89667	5.23667	0.760333	181.4	86	4.23	5.56		3.14	13.42	13
	G79	93	1	61	AM	2018-06-22	2018-07-01	Cage	Dead	TRUE	FALSE	9.5	205.8	4.19231	5.3022										13.42	13
QD517	G8	197	1	DLD	AM	2018-06-22	2018-06-27	Cage	Live	TRUE	TRUE	5.5	209.9	4.41758	5.58242	4.94333	3.79	0.726667	201.2	93.1	4.45	5.78	4.29	3.74	13.93	16
QD359	G80	70	1	61	AM	2018-06-22	2018-06-23	Cage	Live	TRUE	TRUE	1.5	201.2	4.05495	5.51099	0.316533	0.134533	0.430333	215.3	87.9	4.27	5.58	4.66	3.2	13.42	13
QD613	G81	129	1	61	AM	2018-06-22	2018-06-29	Cage	Live	TRUE	TRUE	7.5	213.7	4.23352	5.53022	0.922867	0.862	0.937	198.5	92.9	4.29	5.65			13.42	13
	G82	193	1	61	AM	2018-06-22	2018-06-22	Introduction		FALSE	FALSE	0.5	211.9	4.18407	5.67857										13.42	13
	G83	133	1	61	AM	2018-06-22	2018-06-28	Cage	Dead	TRUE	FALSE	6.5	203.8	4.24451	5.12637										13.42	13
	G84	55	1	61	AM	2018-06-22		Lost		FALSE	FALSE		240.5	4.25824	4.96429										13.42	13
QD618	G85	98	1	61	AM	2018-06-22	2018-06-29	Cage	Live	TRUE	TRUE	7.5	195.4	4.20055	4.83516	2.891	1.84333	0.617333	205	83.6	4.23	5.43		3.3	13.42	13
QD550	G86	153	1	61	AM	2018-06-22	2018-06-28	Cage	Live	TRUE	TRUE	6.5	208.7	4.3544	5.52747	3.41825	1.45075	0.39225	208.5	94.2	4.33	5.77	5.43	2.95	13.42	13
QD732	G87	85	1	61	AM	2018-06-22	2018-07-02	Cage	Live	TRUE	TRUE	10.5	206.8	4.28022	5.12363	3.25467	1.66	0.516	185.1	88.4	4.4	5.71		2.88	13.42	13
	G88	57	1	61	AM	2018-06-22	2018-07-02	Trap		FALSE	FALSE	10.5	231.6	4.1456	5.49451										13.42	13
	G89	157	1	61	AM	2018-06-22	2018-06-23	Trap		FALSE	FALSE	1.5	207.5	4.22253	5.51099										13.42	13
	G9	77	1	DLD	AM	2018-06-22		Lost		FALSE	FALSE		235.9	4.42582	5.50549										13.93	16
	G90	94	1	61	AM	2018-06-22	2018-06-22	Introduction		FALSE	FALSE	0.5	216.7	4.28571	5.53846										13.42	13
	G91	45	1	61	AM	2018-06-22		Lost		FALSE	FALSE		203.5	4.16209	5.31044										13.42	13
QD615	G92	76	1	61	AM	2018-06-22	2018-06-29	Cage	Live	TRUE	TRUE	7.5	183.6	4.21154	5.07143	0.104267	0.0743333	0.333333	182	84.8	4.16	5.39	4.06	2.84	13.42	13
	G93	25	1	61	AM	2018-06-22		Lost		FALSE	FALSE		198.6	4.32692	5.32967										13.42	13
	G94	6	1	61	AM	2018-06-22		Lost		FALSE	FALSE		208.4	4.35989	5.46429										13.42	13
	G95	32	1	61	AM	2018-06-22		Lost		FALSE	FALSE		203.1	4.24725	5.34341										13.42	13
QD627	G96	172	1	61	AM	2018-06-22	2018-06-29	Cage	Live	TRUE	TRUE	7.5	202.3	4.20055	5.46703	1.67267	0.516333	0.325	196.3	87.2	4.12	5.48		2.85	13.42	13
	G97	90	1	61	AM	2018-06-22	2018-06-23	Trap		FALSE	FALSE	1.5	194.9	4.21154	4.9011										13.42	13
	G98	159	1	61	AM	2018-06-22	2018-06-30	Trap		FALSE	FALSE	8.5	191.6	4.31044	5.54121										13.42	13
QD628	G99	108	1	61	AM	2018-06-22	2018-06-29	Cage	Live	TRUE	TRUE	7.5	197.1	4.03571	5.38736	1.76167	0.862	0.417	183.2	89	4.24	5.61		3.18	13.42	13
	O1	10	1	71	AM	2018-06-22		Lost		FALSE	FALSE		238	4.34066	5.51374										12.98	4
QD521	O11	152	1	32	AM	2018-06-22	2018-06-27	Cage	Live	TRUE	TRUE	5.5	245.8	4.59066	5.46703	3.536	2.65	0.754	203.4	90.5	4.47	5.67	5.08	3.62	13.27	9
QD554	O12	59	1	32	AM	2018-06-22	2018-06-28	Cage	Live	TRUE	TRUE	6.5	265.5	4.3489	5.81044	2.808	1.468	0.508333	219.2	101.1	4.39	5.87	5.29	3.28	13.27	9
QD554	O12	123	1	32	AM	2018-06-22	2018-06-28	Cage	Live	TRUE	TRUE	6.5	272	4.3489	5.81044	2.808	1.468	0.508333	219.2	101.1	4.39	5.87	5.29	3.28	13.27	9
	O13	18	1	32	AM	2018-06-22		Lost		FALSE	FALSE		271.4	4.43407	5.86813										13.27	9
	O13	137	1	32	AM	2018-06-22		Lost		FALSE	FALSE		270.1	4.43407	5.86813										13.27	9
	O14	29	1	32	AM	2018-06-22		Lost		FALSE	FALSE		257.8	4.48626	5.60989										13.27	9
QD520	O16	15	1	32	AM	2018-06-22	2018-06-27	Cage	Live	TRUE	TRUE	5.5	230.7	4.29945	5.51374	4.44133	3.52667	0.786667	202.1	91.9	4.24	5.59	5.12	3.84	13.27	9
QD555	O17	135	1	32	AM	2018-06-22	2018-06-28	Cage	Live	TRUE	TRUE	6.5	222.7	4.28846	5.20604	4.49	2.53	0.564667	214	87.3	4.09	5.4	4.93	3.52	13.27	9
QD714	O18	75	1	32	AM	2018-06-22	2018-07-01	Cage	Live	TRUE	TRUE	9.5	277.9	4.37363	5.47527	6.55333	4.56	0.694333	219.8	102.6	4.49	5.99	5.13	3.88	13.27	9
QD611	O2	87	1	71	AM	2018-06-22	2018-06-29	Cage	Live	TRUE	TRUE	7.5	233	4.25549	5.6456	3.59533	2.3	0.645667	231.9	96.2	4.27	5.7	5.58	3.43	12.98	4
QD685	O3	95	1	71	AM	2018-06-22	2018-06-30	Cage	Live	TRUE	TRUE	8.5	248	4.42582	5.41758	8.42333	4.35	0.516333	202.2	98.7	4.4	5.72	4.82	3.9	12.98	4
QD846	O4	2	1	71	AM	2018-06-22	2018-07-08	Cage	Live	TRUE	TRUE	16.5	262.3	4.45879	5.69505	14.9633	12.0333	0.804	226	105.9	4.55	5.94	5.38	3.87	12.98	4
QD757	O5	11	1	71	AM	2018-06-22	2018-07-03	Cage	Live	TRUE	TRUE	11.5	258.6	4.36813	5.63736	14.05	11.6667	0.829333	190.8	95.9	4.37	5.87	4.93	3.63	12.98	4
QD915	O6	139	1	71	AM	2018-06-22	2018-07-12	Cage	Live	TRUE	TRUE	20.5	247.5	4.50275	5.52198	9.76433	8.72	0.894667	199.6	96.4	4.53	5.93	5.39	3.38	12.98	4
	O7	82	1	32	AM	2018-06-22		Lost		FALSE	FALSE		254.4	4.39011	5.49451										13.27	9
QD624	O8	3	1	32	AM	2018-06-22	2018-06-29	Cage	Live	TRUE	TRUE	7.5	224.2	4.33242	5.30769	4.44333	3.85667	0.863	190.4	89.3	4.36	5.56	5.37	3.87	13.27	9
	O1	34	1	71	AM	2018-06-22		Lost		FALSE	FALSE		271.3	4.34066	5.51374										12.98	4
	O9	111	1	32	AM	2018-06-22		Lost		FALSE	FALSE		207.4	4.26923	5.57143										13.27	9
	W1	16	1	61	AM	2018-06-22	2018-06-30	Cage	Dead	TRUE	FALSE	8.5	198.4	4.25	5.39286										13.42	13
QD621	W10	50	1	61	AM	2018-06-22	2018-06-29	Cage	Live	TRUE	TRUE	7.5	186	4.2033	5.26374	10.3525	7.6725	0.749	199.9	87.8	4.18	5.56	4.74	3.78	13.42	13
QD617	W11	116	1	61	AM	2018-06-22	2018-06-29	Cage	Live	TRUE	TRUE	7.5	190.2	4.23077	5.23901	4.695	2.825	0.45525	161.1	86.4	4.33	5.53		2.88	13.42	13
	W12	44	1	61	AM	2018-06-22	2018-06-23	Trap		FALSE	FALSE	1.5	224.4	4.25549	5.52198										13.42	13
	W13	53	1	61	AM	2018-06-22	2018-06-23	Trap		FALSE	FALSE	1.5	197.6	4.27473	5.32967										13.42	13
	W14	203	1	61	AM	2018-06-22	2018-06-23	Trap		FALSE	FALSE	1.5	198.8	4.26648	5.53297										13.42	13
QD641	W15	158	1	61	AM	2018-06-22	2018-06-29	Cage	Live	TRUE	TRUE	7.5	208.4	4.07143	5.33242	7.53	5.35333	0.710667	178.3	83.1	4.22	5.41		3.5	13.42	13
QD682	W16	20	1	61	AM	2018-06-22	2018-06-30	Cage	Live	TRUE	TRUE	8.5	191.2	4.18132	5.45055	2.32833	1.24	0.547333	168.1	83.5	4.18	5.6	5.02	2.67	13.42	13
	W18	60	1	61	AM	2018-06-22	2018-06-23	Trap		FALSE	FALSE	1.5	205.2												13.42	13
QD629	W19	124	1	61	AM	2018-06-22	2018-06-29	Cage	Live	TRUE	TRUE	7.5	195.4	4.18407	5.37088	0.788	0.288333	0.446333	178.5	88.4	4.19	5.34		2.22	13.42	13
	W2	200	1	61	AM	2018-06-22	2018-07-01	Cage	Dead	TRUE	FALSE	9.5	204.2	4.40385	5.61813										13.42	13
	W20	145	1	61	AM	2018-06-22		Lost		FALSE	FALSE		209.4	4.3956	4.92582										13.42	13
	W21	100	1	61	AM	2018-06-22		Lost		FALSE	FALSE		186.4	4.28571	5.36264										13.42	13
	W22	66	1	61	AM	2018-06-22		Lost		FALSE	FALSE		199.2	4.32692	5.4478										13.42	13
	W23	134	1	61	AM	2018-06-22		Lost		FALSE	FALSE		214.9	4.04945	4.87637										13.42	13
QD622	W24	192	1	61	AM	2018-06-22	2018-06-29	Cage	Live	TRUE	TRUE	7.5	181.6	4.23901	5.20055	5.61267	4.4	0.78	194.4	83.6	4.17	5.56	5.36	3.14	13.42	13
	W25	42	1	61	AM	2018-06-22		Lost		FALSE	FALSE		189.1	4.18956	5.45604										13.42	13
	W26	74	1	61	AM	2018-06-22		Lost		FALSE	FALSE		211.9	4.18407	5.36538										13.42	13
QD718	W27	188	1	61	AM	2018-06-22	2018-07-01	Cage	Live	TRUE	TRUE	9.5	202.4	4.28846	5.3022	1.71333	0.425667	0.302667	199.7	81.7	4.32	5.48	4.99	3.64	13.42	13
	W28	118	1	61	AM	2018-06-22	2018-06-28	Cage	Dead	TRUE	FALSE	6.5	204.6	4.25	5.48626										13.42	13
QD619	W29	38	1	61	AM	2018-06-22	2018-06-29	Cage	Live	TRUE	TRUE	7.5	197.4	4.27198	5.35714	2.3865	1.695	0.744	180.9	87.5	4.32	5.53	5.22	3.06	13.42	13
	W3	92	1	61	AM	2018-06-22		Lost		FALSE	FALSE		221.6	4.30495	5.31868										13.42	13
	W30	187	1	61	AM	2018-06-22	2018-06-27	Cage	Dead	TRUE	FALSE	5.5	203.2	4.3022	5.54945										13.42	13
QD545	W31	43	1	61	AM	2018-06-22	2018-06-28	Cage	Live	TRUE	TRUE	6.5	187.7	4.34341	5.48352	4.83333	2.6	0.524333	185.5	90.5	4.23	5.64	5	3.59	13.42	13
	W32	175	1	61	AM	2018-06-22		Lost		FALSE	FALSE		172.9	4.0989	4.96154										13.42	13
	W33	163	1	61	AM	2018-06-22	2018-06-30	Trap		FALSE	FALSE	8.5	221.2	4.28022	5.47802										13.42	13
	W34	162	1	61	AM	2018-06-22	2018-06-26	Trap		FALSE	FALSE	4.5	173	4.17857	5.16209										13.42	13
	W35	120	1	61	AM	2018-06-22	2018-07-08	Cage	Dead	TRUE	FALSE	16.5	206.8	4.0989	5.33242										13.42	13
QD551	W36	22	1	61	AM	2018-06-22	2018-06-28	Cage	Live	TRUE	TRUE	6.5	207.3	4.27198	5.58242	3.43267	1.236	0.342667	202.7	95	4.3	5.8		2.79	13.42	13
	W37	190	1	61	AM	2018-06-22		Lost		FALSE	FALSE		198.5	4.36264	5.21703										13.42	13
	W39	149	1	61	AM	2018-06-22	2018-06-28	Cage	Dead	TRUE	FALSE	6.5	172.2	4.09615	4.8956										13.42	13
	W40	146	1	61	AM	2018-06-22	2018-07-02	Cage	Dead	TRUE	FALSE	10.5	194.1	4.34615	5.42582										13.42	13
	W41	132	1	61	AM	2018-06-22	2018-06-29	Cage	Dead	TRUE	FALSE	7.5	224.6	4.34066	5.48626										13.42	13
QD684	W42	122	1	61	AM	2018-06-22	2018-06-30	Cage	Live	TRUE	TRUE	8.5	195.5	4.29121	5.39835	2.16467	1.321	0.56	169.1	82.2	4.26	5.37		2.57	13.42	13
	W43	198	1	61	AM	2018-06-22		Lost		FALSE	FALSE		204.8	4.28022	5.54396										13.42	13
	W44	37	1	61	AM	2018-06-22	2018-07-01	Cage	Dead	TRUE	FALSE	9.5	217.9	4.17308	5.50824										13.42	13
	W45	155	1	61	AM	2018-06-22		Lost		FALSE	FALSE		201.9	4.19231	5.45055										13.42	13
	W46	61	1	61	AM	2018-06-22	2018-06-30	Cage	Dead	TRUE	FALSE	8.5	200.7	4.09615	5.23626										13.42	13
QD412	W47	7	1	61	AM	2018-06-22	2018-06-25	Cage	Live	TRUE	TRUE	3.5	204.9	4.0467	5.17033	1.055	0.424	0.394667	188.4	85.7	4.15	5.39	4.41	3.55	13.42	13
QD614	W48	204	1	61	AM	2018-06-22	2018-06-29	Cage	Live	TRUE	TRUE	7.5	190.6	4.26648	5.51374	0.0900667	0.0900667	0.666667	180.9	91.5	4.29	5.6	4.89	3.3	13.42	13
QD730	W49	168	1	61	AM	2018-06-22	2018-07-02	Cage	Live	TRUE	TRUE	10.5	225.5	4.33242	5.64011	6.27667	1.43	0.235333	184.3	87.4	4.39	5.85		3.19	13.42	13
	W5	51	1	61	AM	2018-06-22	2018-06-27	Cage	Dead	TRUE	FALSE	5.5	206.5	4.03846	5.32967										13.42	13
	W5	196	1	61	AM	2018-06-22	2018-06-27	Cage	Dead	TRUE	FALSE	5.5	193.6	4.03846	5.32967										13.42	13
	W50	26	1	61	AM	2018-06-22	2018-06-27	Trap		FALSE	FALSE	5.5	185.6	4.15659	4.86813										13.42	13
	W51	12	1	61	AM	2018-06-22	2018-06-26	Trap		FALSE	FALSE	4.5	208	4.31319	5.62088										13.42	13
	W52	205	1	61	AM	2018-06-22	2018-06-23	Trap		FALSE	FALSE	1.5	218.4	4.07418	5.60989										13.42	13
QD686	W53	115	1	61	AM	2018-06-22	2018-06-30	Cage	Live	TRUE	TRUE	8.5	199.6	4.23352	5.20879	6.548	5.02333	0.769	167.4	83.1	4.21	5.47	4.89	2.81	13.42	13
QD683	W54	208	1	61	AM	2018-06-22	2018-06-30	Cage	Live	TRUE	TRUE	8.5	213.7	4.26923	5.11264	4.48667	3.07667	0.686667	182.2	83.7	4.16	5.41		2.98	13.42	13
	W55	105	1	61	AM	2018-06-22	2018-07-02	Cage	Dead	TRUE	FALSE	10.5	195.3	4.30495	5.49176										13.42	13
	W56	86	1	61	AM	2018-06-22		Lost		FALSE	FALSE		211.1	4.20055	5.41758										13.42	13
	W57	181	1	61	AM	2018-06-22	2018-06-23	Trap		FALSE	FALSE	1.5	185.4	4.09341	4.87363										13.42	13
QD922	W58	184	1	61	AM	2018-06-22	2018-07-15	Cage	Live	TRUE	TRUE	23.5	211	4.12637	5.56868	2.54033	2	0.786	181.6	86.6	4.25	5.66	5.06	2.82	13.42	13
	W59	121	1	61	AM	2018-06-22		Lost		FALSE	FALSE		249.9	4.37637	5.43956										13.42	13
QD515	W6	170	1	61	AM	2018-06-22	2018-06-27	Cage	Live	TRUE	TRUE	5.5	193.6	4.25824	5.51099	3.19	2.74	0.859	207.3	87.7	4.32	5.58		3.13	13.42	13
QD911	W60	207	1	61	AM	2018-06-22	2018-07-12	Cage	Live	TRUE	TRUE	20.5	183.3	4.22253	5.53297	8.671	7.58	0.872333	175.6	81.4	4.3	5.53	4.71	3.25	13.42	13
	W61	1	1	61	AM	2018-06-22	2018-07-01	Cage	Dead	TRUE	FALSE	9.5	214.2	4.24451	5.32692										13.42	13
	W62	89	1	61	AM	2018-06-22	2018-07-01	Cage	Dead	TRUE	FALSE	9.5	191.2	4.13462	5.18407										13.42	13
	W63	189	1	61	AM	2018-06-22		Lost		FALSE	FALSE		216.5	4.34615	5.33242										13.42	13
	W65	46	1	61	AM	2018-06-22		Lost		FALSE	FALSE		208.1	4.18681	5.5989										13.42	13
	W66	213	1	61	AM	2018-06-22	2018-06-27	Cage	Dead	TRUE	FALSE	5.5	198.7	4.2033	5.12088										13.42	13
	W67	169	1	61	AM	2018-06-22		Lost		FALSE	FALSE		191.1	4.06044	5.42582										13.42	13
	W68	160	1	61	AM	2018-06-22	2018-07-01	Cage	Dead	TRUE	FALSE	9.5	198.7	4.21978	5.46154										13.42	13
	W69	179	1	61	AM	2018-06-22	2018-06-22	Introduction		FALSE	FALSE	0.5	160.8	4.35165	5.37363										13.42	13
QD887	W7	54	1	61	AM	2018-06-22	2018-07-11	Cage	Live	TRUE	TRUE	19.5	209.3	4.3022	5.76374	5.9625	3.2725	0.49675	185.4	93.8	4.35	5.85		2.66	13.42	13
QD887	W7	69	1	61	AM	2018-06-22	2018-07-11	Cage	Live	TRUE	TRUE	19.5	201.9	4.3022	5.76374	5.9625	3.2725	0.49675	185.4	93.8	4.35	5.85		2.66	13.42	13
	W70	101	1	61	AM	2018-06-22	2018-06-22	Introduction		FALSE	FALSE	0.5	224.6	4.25275	5.42582										13.42	13
QD731	W71	194	1	61	AM	2018-06-22	2018-07-02	Cage	Live	TRUE	TRUE	10.5	201.3	4.32143	5.67857	3.45333	1.97667	0.574	158.8	84.7	4.27	5.74		2.99	13.42	13
	W72	161	1	71	AM	2018-06-22		Lost		FALSE	FALSE		282.6	4.3956	5.56044										12.98	4
	W73	64	1	71	AM	2018-06-22	2018-07-01	Cage	Dead	TRUE	FALSE	9.5	272.7	4.51099	5.8022										12.98	4
	W74	28	1	71	AM	2018-06-22		Lost		FALSE	FALSE		242.3	4.31868	5.4478										12.98	4
QD716	W75	147	1	71	AM	2018-06-22	2018-07-01	Cage	Live	TRUE	TRUE	9.5	253.6	4.20879	5.25824	13.514	12.0333	0.889	215	97.5	4.23	5.83	5.09	4.28	12.98	4
	W76	23	1	71	AM	2018-06-22		Lost		FALSE	FALSE		246.2	4.37637	5.28846										12.98	4
	W77	212	1	71	AM	2018-06-22		Lost		FALSE	FALSE		235.7	4.2967	5.86538										12.98	4
	W78	104	1	71	AM	2018-06-22		Lost		FALSE	FALSE		260.9	4.33242	5.67033										12.98	4
	W79	195	1	71	AM	2018-06-22	2018-06-27	Cage	Dead	TRUE	FALSE	5.5	249.8	4.53571	5.6978										12.98	4
	W8	185	1	61	AM	2018-06-22		Lost		FALSE	FALSE		280	4.20604	5.27747										13.42	13
QD612	W80	167	1	71	AM	2018-06-22	2018-06-29	Cage	Live	TRUE	TRUE	7.5	212.8	4.54396	5.57967	0.880833	0.806667	0.849667	214.8	93.6	4.51	5.66	4.82	3.41	12.98	4
	W82	63	1	71	AM	2018-06-22		Lost		FALSE	FALSE		241.6	4.31593	5.4478										12.98	4
QD355	W83	102	1	71	AM	2018-06-22	2018-06-23	Cage	Live	TRUE	TRUE	1.5	210.8	3.73901	5.35165	2.32567	1.07533	0.482	185.2	90.7	3.7	5.45	4.35	3.13	12.98	4
	W84	164	1	71	AM	2018-06-22		Lost		FALSE	FALSE		252.8	4.42308	5.6044										12.98	4
	W85	27	1	71	AM	2018-06-22		Lost		FALSE	FALSE		242	4.40934	5.31593										12.98	4
	W86	165	1	71	AM	2018-06-22		Lost		FALSE	FALSE		205.7												12.98	4
	W87	81	1	71	AM	2018-06-22		Trap		FALSE	FALSE		255.8	4.33242	5.27198										12.98	4
	W88	150	1	71	AM	2018-06-22		Lost		FALSE	FALSE		284.9	4.54396	5.85165										12.98	4
	W89	9	1	71	AM	2018-06-22		Cage	Dead	TRUE	FALSE		228.7	4.33791	5.67033										12.98	4
	W9	5	1	61	AM	2018-06-22		Lost		FALSE	FALSE		212	4.28022	5.44231										13.42	13
	W90	72	1	71	AM	2018-06-22		Cage	Dead	TRUE	FALSE		268.3	4.5989	5.76099										12.98	4
	W91	144	1	71	AM	2018-06-22		Lost		FALSE	FALSE		241.9	4.41484	5.4011										12.98	4
	W92	174	1	71	AM	2018-06-22		Lost		FALSE	FALSE		253.3	4.48077	5.81593										12.98	4
	W93	4	1	71	AM	2018-06-22		Trap		FALSE	FALSE		258.2	4.5	5.77473										12.98	4
	W94	209	1	71	AM	2018-06-22		Cage	Dead	TRUE	FALSE		218.2	4.32692	5.00824										12.98	4
	W95	84	1	71	AM	2018-06-22		Lost		FALSE	FALSE		251.3	4.52473	5.71703										12.98	4
	W96	78	1	71	AM	2018-06-22		Lost		FALSE	FALSE		245.7	4.33242	5.26648										12.98	4
QD715	W97	110	1	71	AM	2018-06-22	2018-07-01	Cage	Live	TRUE	TRUE	9.5	262.8	4.48077	5.6511	10.99	9.12	0.821	221.7	98.6	4.34	5.8	5.19	3.71	12.98	4
	W98	79	1	71	AM	2018-06-22		Lost		FALSE	FALSE		223.8	4.32692	5.51099										12.98	4
	W99	125	1	71	AM	2018-06-22		Lost		FALSE	FALSE		253.3	4.42857	5.70879										12.98	4
	Gry/Red		1	14	AM	2018-06-21	2018-06-23	Cage	Live	TRUE	FALSE	2.5							222.5						12.88	21
	Gry/Red		1	14	AM	2018-06-21	2018-06-23	Cage	Live	TRUE	FALSE	2.5							188.2						12.88	21
	Gry/Red		1	14	AM	2018-06-21	2018-06-23	Cage	Live	TRUE	FALSE	2.5							162						12.88	21
	Gry/Grn		1	16	AM	2018-06-21	2018-06-23	Cage	Live	TRUE	FALSE	2.5							232.6						13.33	3
	Gry/Wht		1	61	AM	2018-06-21	2018-06-23	Cage	Live	TRUE	FALSE	2.5							188.9						13.42	13
	Gry/Wht		1	61	AM	2018-06-21	2018-06-23	Cage	Live	TRUE	FALSE	2.5							244.6						13.42	13
	Gry/Red		1	14	AM	2018-06-21	2018-06-23	Cage	Live	TRUE	FALSE	2.5							240						12.88	21
	Gry/Red		1	14	AM	2018-06-21	2018-06-23	Cage	Live	TRUE	FALSE	2.5							229.6						12.88	21
	Gry/Red		1	14	AM	2018-06-21	2018-06-23	Cage	Live	TRUE	FALSE	2.5							212.5						12.88	21
	Pnk/Blu		1	71	AM	2018-06-19	2018-06-23	Cage	Live	TRUE	FALSE	4.5							219.7						12.98	4
	Pnk/Red		1	14	AM	2018-06-19	2018-06-23	Cage	Live	TRUE	FALSE	4.5							180.2						12.88	21
	Pnk/Red		1	14	AM	2018-06-19	2018-06-23	Cage	Live	TRUE	FALSE	4.5							215.6						12.88	21
	Pnk/Red		1	14	AM	2018-06-19	2018-06-23	Cage	Live	TRUE	FALSE	4.5							218.6						12.88	21
	Pnk/Red		1	14	AM	2018-06-19	2018-06-23	Cage	Live	TRUE	FALSE	4.5							168.5						12.88	21
	Pnk/Prp		1	DLD	AM	2018-06-19	2018-06-23	Cage	Live	TRUE	FALSE	4.5							190.6						13.93	16
	Pnk/Red		1	14	AM	2018-06-19	2018-06-23	Cage	Live	TRUE	FALSE	4.5							177.5						12.88	21
	Pnk/Red		1	14	AM	2018-06-19	2018-06-23	Cage	Live	TRUE	FALSE	4.5							187.5						12.88	21
	Pnk/Red		1	14	AM	2018-06-19	2018-06-23	Cage	Live	TRUE	FALSE	4.5							206.8						12.88	21
	Wht/Red		1	14	AM	2018-06-20	2018-06-23	Cage	Live	TRUE	FALSE	3.5							245.6						12.88	21
	Wht/Red		1	14	AM	2018-06-20	2018-06-23	Cage	Live	TRUE	FALSE	3.5							196						12.88	21
	Wht/Wht		1	61	AM	2018-06-20	2018-06-23	Cage	Live	TRUE	FALSE	3.5							211						13.42	13
	Wht/Red		1	14	AM	2018-06-20	2018-06-23	Cage	Live	TRUE	FALSE	3.5							207.2						12.88	21
	Wht/Red		1	14	AM	2018-06-20	2018-06-23	Cage	Live	TRUE	FALSE	3.5							186.5						12.88	21
	Wht/Red		1	14	AM	2018-06-20	2018-06-23	Cage	Live	TRUE	FALSE	3.5							227.5						12.88	21
	Wht/Red		1	14	AM	2018-06-20	2018-06-23	Cage	Live	TRUE	FALSE	3.5							216.6						12.88	21
	Wht/Grn		1	16	AM	2018-06-20	2018-06-23	Cage	Live	TRUE	FALSE	3.5							273.6						13.33	3
	Wht/Red		1	14	AM	2018-06-20	2018-06-23	Cage	Live	TRUE	FALSE	3.5							184.4						12.88	21
	Wht/Red		1	14	AM	2018-06-20	2018-06-23	Cage	Live	TRUE	FALSE	3.5							193.8						12.88	21
	Wht/Grn		1	16	AM	2018-06-20	2018-06-23	Cage	Live	TRUE	FALSE	3.5							231.3						13.33	3
	Pnk/Red		1	14	PM	2018-06-19	2018-06-23	Cage	Live	TRUE	FALSE	4							184.6						12.88	21
	Pnk/Red		1	14	PM	2018-06-19	2018-06-23	Cage	Live	TRUE	FALSE	4							188						12.88	21
	Wht/Red		1	14	PM	2018-06-20	2018-06-23	Cage	Live	TRUE	FALSE	3							189.3						12.88	21
	Wht/Red		1	14	PM	2018-06-20	2018-06-23	Cage	Live	TRUE	FALSE	3							203.5						12.88	21
	Wht/Blu		1	71	PM	2018-06-20	2018-06-23	Cage	Live	TRUE	FALSE	3							235.5						12.98	4
	Grn/Wht		1	61	PM	2018-06-17	2018-06-23	Cage	Live	TRUE	FALSE	6							181.6						13.42	13
	Grn/Wht		1	61	PM	2018-06-17	2018-06-23	Cage	Live	TRUE	FALSE	6							190.5						13.42	13
	Grn/Wht		1	61	PM	2018-06-17	2018-06-23	Cage	Live	TRUE	FALSE	6							201.5						13.42	13
	Pnk/Grn		1	16	PM	2018-06-19	2018-06-23	Cage	Live	TRUE	FALSE	4							218.7						13.33	3
	Wht/Blu		1	71	PM	2018-06-20	2018-06-23	Cage	Live	TRUE	FALSE	3							203.1						12.98	4
	Wht/Red		1	14	PM	2018-06-20	2018-06-23	Cage	Live	TRUE	FALSE	3							186.6						12.88	21
	Grn/Wht		1	61	PM	2018-06-17	2018-06-23	Cage	Live	TRUE	FALSE	6							181.6						13.42	13
	Wht/Red		1	14	PM	2018-06-20	2018-06-23	Cage	Live	TRUE	FALSE	3							205.1						12.88	21
	Wht/Red		1	14	PM	2018-06-20	2018-06-23	Cage	Live	TRUE	FALSE	3							214.7						12.88	21
	Wht/Red		1	14	PM	2018-06-20	2018-06-23	Cage	Live	TRUE	FALSE	3							208.6						12.88	21
	Wht/Red		1	14	PM	2018-06-20	2018-06-23	Cage	Live	TRUE	FALSE	3							225.2						12.88	21
	Wht/Red		1	14	PM	2018-06-20	2018-06-23	Cage	Live	TRUE	FALSE	3							217						12.88	21
	Grn/Wht		1	61	PM	2018-06-17	2018-06-23	Cage	Live	TRUE	FALSE	6							258.1						13.42	13
	Grn/Wht		1	61	PM	2018-06-17	2018-06-23	Cage	Live	TRUE	FALSE	6							219						13.42	13
	Grn/Wht		1	61	PM	2018-06-17	2018-06-23	Cage	Live	TRUE	FALSE	6							215.5						13.42	13
	Gry/Wht		1	61	AM	2018-06-21	2018-06-25	Cage	Live	TRUE	FALSE	4.5							200.2						13.42	13
	Gry/Wht		1	61	AM	2018-06-21	2018-06-25	Cage	Live	TRUE	FALSE	4.5							210.9						13.42	13
	Gry/Wht		1	61	AM	2018-06-21	2018-06-25	Cage	Live	TRUE	FALSE	4.5							221.5						13.42	13
	Gry/Wht		1	61	AM	2018-06-21	2018-06-25	Cage	Live	TRUE	FALSE	4.5							201.6						13.42	13
	Gry/Red		1	14	AM	2018-06-21	2018-06-25	Cage	Live	TRUE	FALSE	4.5							192.8						12.88	21
	Gry/Red		1	14	AM	2018-06-21	2018-06-25	Cage	Live	TRUE	FALSE	4.5							243.7						12.88	21
	Gry/Red		1	14	AM	2018-06-21	2018-06-25	Cage	Live	TRUE	FALSE	4.5							228.5						12.88	21
	Gry/Red		1	14	AM	2018-06-21	2018-06-25	Cage	Live	TRUE	FALSE	4.5							183.7						12.88	21
	Wht/Red		1	14	AM	2018-06-20	2018-06-25	Cage	Live	TRUE	FALSE	5.5							193.9						12.88	21
	Wht/Red		1	14	AM	2018-06-20	2018-06-25	Cage	Live	TRUE	FALSE	5.5							183						12.88	21
	Wht/Red		1	14	AM	2018-06-20	2018-06-25	Cage	Live	TRUE	FALSE	5.5							204						12.88	21
	Wht/Red		1	14	AM	2018-06-20	2018-06-25	Cage	Live	TRUE	FALSE	5.5							218.7						12.88	21
	Wht/Red		1	14	AM	2018-06-20	2018-06-25	Cage	Live	TRUE	FALSE	5.5							240.7						12.88	21
	Wht/Red		1	14	AM	2018-06-20	2018-06-25	Cage	Live	TRUE	FALSE	5.5							219.6						12.88	21
	Wht/Red		1	14	AM	2018-06-20	2018-06-25	Cage	Live	TRUE	FALSE	5.5							231.8						12.88	21
	Wht/Red		1	14	AM	2018-06-20	2018-06-25	Cage	Live	TRUE	FALSE	5.5							208.2						12.88	21
	Wht/Red		1	14	AM	2018-06-20	2018-06-25	Cage	Live	TRUE	FALSE	5.5							177.7						12.88	21
	Wht/Red		1	14	AM	2018-06-20	2018-06-25	Cage	Live	TRUE	FALSE	5.5							198.3						12.88	21
	Wht/Red		1	14	AM	2018-06-20	2018-06-25	Cage	Live	TRUE	FALSE	5.5							192.9						12.88	21
	Wht/Red		1	14	AM	2018-06-20	2018-06-25	Cage	Live	TRUE	FALSE	5.5							213.2						12.88	21
	Wht/Red		1	14	AM	2018-06-20	2018-06-25	Cage	Live	TRUE	FALSE	5.5							206.9						12.88	21
	Wht/Red		1	14	AM	2018-06-20	2018-06-25	Cage	Live	TRUE	FALSE	5.5							207.7						12.88	21
	Wht/Red		1	14	AM	2018-06-20	2018-06-25	Cage	Live	TRUE	FALSE	5.5							193						12.88	21
	Wht/Red		1	14	AM	2018-06-20	2018-06-25	Cage	Live	TRUE	FALSE	5.5							211.9						12.88	21
	Wht/Red		1	14	AM	2018-06-20	2018-06-25	Cage	Live	TRUE	FALSE	5.5							231.8						12.88	21
	Wht/Wht		1	61	AM	2018-06-20	2018-06-25	Cage	Live	TRUE	FALSE	5.5							200.4						13.42	13
	Pnk/Red		1	14	AM	2018-06-19	2018-06-25	Cage	Live	TRUE	FALSE	6.5							217.3						12.88	21
	Pnk/Red		1	14	AM	2018-06-19	2018-06-25	Cage	Live	TRUE	FALSE	6.5							190.5						12.88	21
	Pnk/Red		1	14	AM	2018-06-19	2018-06-25	Cage	Live	TRUE	FALSE	6.5							207.5						12.88	21
	Pnk/Red		1	14	AM	2018-06-19	2018-06-25	Cage	Live	TRUE	FALSE	6.5							185.1						12.88	21
	Pnk/Red		1	14	AM	2018-06-19	2018-06-25	Cage	Live	TRUE	FALSE	6.5							180.4						12.88	21
	Pnk/Red		1	14	AM	2018-06-19	2018-06-25	Cage	Live	TRUE	FALSE	6.5							168.7						12.88	21
	Pnk/Red		1	14	AM	2018-06-19	2018-06-25	Cage	Live	TRUE	FALSE	6.5							217.1						12.88	21
	Pnk/Red		1	14	AM	2018-06-19	2018-06-25	Cage	Live	TRUE	FALSE	6.5							198.9						12.88	21
	Pnk/Red		1	14	AM	2018-06-19	2018-06-25	Cage	Live	TRUE	FALSE	6.5							192.9						12.88	21
	Pnk/Red		1	14	AM	2018-06-19	2018-06-25	Cage	Live	TRUE	FALSE	6.5							191.3						12.88	21
	Pnk/Red		1	14	AM	2018-06-19	2018-06-25	Cage	Live	TRUE	FALSE	6.5							209.4						12.88	21
	Pnk/Red		1	14	AM	2018-06-19	2018-06-25	Cage	Live	TRUE	FALSE	6.5							224.9						12.88	21
	Pnk/Red		1	14	AM	2018-06-19	2018-06-25	Cage	Live	TRUE	FALSE	6.5							178.5						12.88	21
	Pnk/Red		1	14	AM	2018-06-19	2018-06-25	Cage	Live	TRUE	FALSE	6.5							218.4						12.88	21
	Pnk/Red		1	14	AM	2018-06-19	2018-06-25	Cage	Live	TRUE	FALSE	6.5							226.6						12.88	21
	Pnk/Red		1	14	AM	2018-06-19	2018-06-25	Cage	Live	TRUE	FALSE	6.5							193.7						12.88	21
	Pnk/Red		1	14	AM	2018-06-19	2018-06-25	Cage	Live	TRUE	FALSE	6.5							202.1						12.88	21
	Pnk/Red		1	14	AM	2018-06-19	2018-06-25	Cage	Live	TRUE	FALSE	6.5							221.6						12.88	21
	Pnk/Red		1	14	AM	2018-06-19	2018-06-25	Cage	Live	TRUE	FALSE	6.5							196.3						12.88	21
	Pnk/Red		1	14	AM	2018-06-19	2018-06-25	Cage	Live	TRUE	FALSE	6.5							169.4						12.88	21
	Pnk/Prp		1	DLD	AM	2018-06-19	2018-06-25	Cage	Live	TRUE	FALSE	6.5							215.7						13.93	16
	Pnk/Prp		1	DLD	AM	2018-06-19	2018-06-25	Cage	Live	TRUE	FALSE	6.5							198						13.93	16
	Pnk/Prp		1	DLD	AM	2018-06-19	2018-06-25	Cage	Live	TRUE	FALSE	6.5							223.5						13.93	16
	Pnk/Prp		1	DLD	AM	2018-06-19	2018-06-25	Cage	Live	TRUE	FALSE	6.5							218.1						13.93	16
	Pnk/Prp		1	DLD	AM	2018-06-19	2018-06-25	Cage	Live	TRUE	FALSE	6.5							214.3						13.93	16
	Pnk/Prp		1	DLD	AM	2018-06-19	2018-06-25	Cage	Live	TRUE	FALSE	6.5							192.3						13.93	16
	Pnk/Prp		1	DLD	AM	2018-06-19	2018-06-25	Cage	Live	TRUE	FALSE	6.5							207.8						13.93	16
	Pnk/Prp		1	DLD	AM	2018-06-19	2018-06-25	Cage	Live	TRUE	FALSE	6.5							224.9						13.93	16
	Pnk/Yel		1	32	AM	2018-06-19	2018-06-25	Cage	Live	TRUE	FALSE	6.5							177.3						13.27	9
	Pnk/Yel		1	32	AM	2018-06-19	2018-06-25	Cage	Live	TRUE	FALSE	6.5							201.4						13.27	9
	Pnk/Blu		1	71	AM	2018-06-19	2018-06-25	Cage	Live	TRUE	FALSE	6.5							221.8						12.98	4
	Blu/Wht		1	61	AM	2018-06-18	2018-06-25	Cage	Live	TRUE	FALSE	7.5							216.6						13.42	13
	Blu/Wht		1	61	AM	2018-06-18	2018-06-25	Cage	Live	TRUE	FALSE	7.5							198						13.42	13
	Blu/Wht		1	61	AM	2018-06-18	2018-06-25	Cage	Live	TRUE	FALSE	7.5							198.1						13.42	13
	Blu/Wht		1	61	AM	2018-06-18	2018-06-25	Cage	Live	TRUE	FALSE	7.5							219.3						13.42	13
	Blu/Wht		1	61	AM	2018-06-18	2018-06-25	Cage	Live	TRUE	FALSE	7.5							202.5						13.42	13
	Blu/Wht		1	61	AM	2018-06-18	2018-06-25	Cage	Live	TRUE	FALSE	7.5							222.7						13.42	13
	Blu/Wht		1	61	AM	2018-06-18	2018-06-25	Cage	Live	TRUE	FALSE	7.5							181.3						13.42	13
	Blu/Wht		1	61	AM	2018-06-18	2018-06-25	Cage	Live	TRUE	FALSE	7.5							209.3						13.42	13
	Blu/Wht		1	61	AM	2018-06-18	2018-06-25	Cage	Live	TRUE	FALSE	7.5							205.1						13.42	13
	Blu/Yel		1	32	AM	2018-06-18	2018-06-25	Cage	Live	TRUE	FALSE	7.5							224.7						13.27	9
	Blu/Yel		1	32	AM	2018-06-18	2018-06-25	Cage	Live	TRUE	FALSE	7.5							205.9						13.27	9
	Wht/Red		1	14	PM	2018-06-20	2018-06-25	Cage	Live	TRUE	FALSE	5							215.4						12.88	21
	Wht/Wht		1	61	PM	2018-06-20	2018-06-25	Cage	Live	TRUE	FALSE	5							204.5						13.42	13
	Wht/Wht		1	61	PM	2018-06-20	2018-06-25	Cage	Live	TRUE	FALSE	5							255.1						13.42	13
	Wht/Blu		1	71	PM	2018-06-20	2018-06-25	Cage	Live	TRUE	FALSE	5							247						12.98	4
	Pnk/Red		1	14	PM	2018-06-19	2018-06-25	Cage	Live	TRUE	FALSE	6							181.9						12.88	21
	Pnk/Red		1	14	PM	2018-06-19	2018-06-25	Cage	Live	TRUE	FALSE	6							204.1						12.88	21
	Pnk/Red		1	14	PM	2018-06-19	2018-06-25	Cage	Live	TRUE	FALSE	6							209.7						12.88	21
	Grn/Wht		1	61	PM	2018-06-17	2018-06-25	Cage	Live	TRUE	FALSE	8							189.8						13.42	13
	Grn/Wht		1	61	PM	2018-06-17	2018-06-25	Cage	Live	TRUE	FALSE	8							192.3						13.42	13
	Grn/Wht		1	61	PM	2018-06-17	2018-06-25	Cage	Live	TRUE	FALSE	8							209						13.42	13
	Grn/Wht		1	61	PM	2018-06-17	2018-06-25	Cage	Live	TRUE	FALSE	8							230.6						13.42	13
	Grn/Wht		1	61	PM	2018-06-17	2018-06-27	Cage	Live	TRUE	FALSE	10							211.5						13.42	13
	Grn/Wht		1	61	PM	2018-06-17	2018-06-27	Cage	Live	TRUE	FALSE	10							197.9						13.42	13
	Grn/Wht		1	61	PM	2018-06-17	2018-06-27	Cage	Live	TRUE	FALSE	10							210.8						13.42	13
	Grn/Wht		1	61	PM	2018-06-17	2018-06-27	Cage	Live	TRUE	FALSE	10							185.6						13.42	13
	Grn/Wht		1	61	PM	2018-06-17	2018-06-27	Cage	Live	TRUE	FALSE	10							182.6						13.42	13
	Grn/Wht		1	61	PM	2018-06-17	2018-06-27	Cage	Live	TRUE	FALSE	10							173.2						13.42	13
	Grn/Wht		1	61	PM	2018-06-17	2018-06-27	Cage	Live	TRUE	FALSE	10							147.6						13.42	13
	Grn/Wht		1	61	PM	2018-06-17	2018-06-27	Cage	Live	TRUE	FALSE	10							189.1						13.42	13
	Gry/Wht		1	61	PM	2018-06-21	2018-06-27	Cage	Live	TRUE	FALSE	6							197.1						13.42	13
	Gry/Wht		1	61	PM	2018-06-21	2018-06-27	Cage	Live	TRUE	FALSE	6							176						13.42	13
	Gry/Yel		1	32	PM	2018-06-21	2018-06-27	Cage	Live	TRUE	FALSE	6							211.1						13.27	9
	Gry/Yel		1	32	PM	2018-06-21	2018-06-27	Cage	Live	TRUE	FALSE	6							191.1						13.27	9
	Gry/Red		1	14	PM	2018-06-21	2018-06-27	Cage	Live	TRUE	FALSE	6							191.5						12.88	21
	Gry/Red		1	14	PM	2018-06-21	2018-06-27	Cage	Live	TRUE	FALSE	6							223.1						12.88	21
	Gry/Red		1	14	PM	2018-06-21	2018-06-27	Cage	Live	TRUE	FALSE	6							184.4						12.88	21
	Gry/Red		1	14	PM	2018-06-21	2018-06-27	Cage	Live	TRUE	FALSE	6							197.5						12.88	21
	Gry/Red		1	14	PM	2018-06-21	2018-06-27	Cage	Live	TRUE	FALSE	6							231.7						12.88	21
	Gry/Red		1	14	PM	2018-06-21	2018-06-27	Cage	Live	TRUE	FALSE	6							215.8						12.88	21
	Gry/Red		1	14	PM	2018-06-21	2018-06-27	Cage	Live	TRUE	FALSE	6							160.3						12.88	21
	Gry/Red		1	14	PM	2018-06-21	2018-06-27	Cage	Live	TRUE	FALSE	6							210.1						12.88	21
	Gry/Red		1	14	PM	2018-06-21	2018-06-27	Cage	Live	TRUE	FALSE	6							192.5						12.88	21
	Gry/Red		1	14	PM	2018-06-21	2018-06-27	Cage	Live	TRUE	FALSE	6							186.1						12.88	21
	Gry/Red		1	14	PM	2018-06-21	2018-06-27	Cage	Live	TRUE	FALSE	6							191.8						12.88	21
	Gry/Red		1	14	PM	2018-06-21	2018-06-27	Cage	Live	TRUE	FALSE	6							226.3						12.88	21
	Gry/Red		1	14	PM	2018-06-21	2018-06-27	Cage	Live	TRUE	FALSE	6							210.5						12.88	21
	Gry/Red		1	14	PM	2018-06-21	2018-06-27	Cage	Live	TRUE	FALSE	6							205.7						12.88	21
	Gry/Red		1	14	PM	2018-06-21	2018-06-27	Cage	Live	TRUE	FALSE	6							191.3						12.88	21
	Gry/Red		1	14	PM	2018-06-21	2018-06-27	Cage	Live	TRUE	FALSE	6							219.2						12.88	21
	Gry/Red		1	14	PM	2018-06-21	2018-06-27	Cage	Live	TRUE	FALSE	6							196.1						12.88	21
	Gry/Red		1	14	PM	2018-06-21	2018-06-27	Cage	Live	TRUE	FALSE	6							194						12.88	21
	Gry/Red		1	14	PM	2018-06-21	2018-06-27	Cage	Live	TRUE	FALSE	6							219						12.88	21
	Gry/Red		1	14	PM	2018-06-21	2018-06-27	Cage	Live	TRUE	FALSE	6							169.1						12.88	21
	Wht/Yel		1	32	PM	2018-06-20	2018-06-27	Cage	Live	TRUE	FALSE	7							197.3						13.27	9
	Wht/Yel		1	32	PM	2018-06-20	2018-06-27	Cage	Live	TRUE	FALSE	7							225						13.27	9
	Wht/Yel		1	32	PM	2018-06-20	2018-06-27	Cage	Live	TRUE	FALSE	7							219.4						13.27	9
	Wht/Yel		1	32	PM	2018-06-20	2018-06-27	Cage	Live	TRUE	FALSE	7							200.8						13.27	9
	Wht/Yel		1	32	PM	2018-06-20	2018-06-27	Cage	Live	TRUE	FALSE	7							189.7						13.27	9
	Wht/Grn		1	16	PM	2018-06-20	2018-06-27	Cage	Live	TRUE	FALSE	7							222.8						13.33	3
	Wht/Grn		1	16	PM	2018-06-20	2018-06-27	Cage	Live	TRUE	FALSE	7							223.8						13.33	3
	Wht/Grn		1	16	PM	2018-06-20	2018-06-27	Cage	Live	TRUE	FALSE	7							220.1						13.33	3
	Wht/Grn		1	16	PM	2018-06-20	2018-06-27	Cage	Live	TRUE	FALSE	7							230						13.33	3
	Wht/Grn		1	16	PM	2018-06-20	2018-06-27	Cage	Live	TRUE	FALSE	7							221						13.33	3
	Wht/Grn		1	16	PM	2018-06-20	2018-06-27	Cage	Live	TRUE	FALSE	7							222.6						13.33	3
	Wht/Grn		1	16	PM	2018-06-20	2018-06-27	Cage	Live	TRUE	FALSE	7							226.3						13.33	3
	Wht/Grn		1	16	PM	2018-06-20	2018-06-27	Cage	Live	TRUE	FALSE	7							208.4						13.33	3
	Wht/Grn		1	16	PM	2018-06-20	2018-06-27	Cage	Live	TRUE	FALSE	7							243.1						13.33	3
	Wht/Grn		1	16	PM	2018-06-20	2018-06-27	Cage	Live	TRUE	FALSE	7							208.7						13.33	3
	Wht/Grn		1	16	PM	2018-06-20	2018-06-27	Cage	Live	TRUE	FALSE	7							214.2						13.33	3
	Wht/Grn		1	16	PM	2018-06-20	2018-06-27	Cage	Live	TRUE	FALSE	7							219.8						13.33	3
	Wht/Grn		1	16	PM	2018-06-20	2018-06-27	Cage	Live	TRUE	FALSE	7							229.7						13.33	3
	Wht/Grn		1	16	PM	2018-06-20	2018-06-27	Cage	Live	TRUE	FALSE	7							245.2						13.33	3
	Wht/Grn		1	16	PM	2018-06-20	2018-06-27	Cage	Live	TRUE	FALSE	7							202.4						13.33	3
	Wht/Wht		1	61	PM	2018-06-20	2018-06-27	Cage	Live	TRUE	FALSE	7							198.3						13.42	13
	Wht/Wht		1	61	PM	2018-06-20	2018-06-27	Cage	Live	TRUE	FALSE	7							193.4						13.42	13
	Wht/Wht		1	61	PM	2018-06-20	2018-06-27	Cage	Live	TRUE	FALSE	7							196.7						13.42	13
	Wht/Wht		1	61	PM	2018-06-20	2018-06-27	Cage	Live	TRUE	FALSE	7							201.9						13.42	13
	Wht/Wht		1	61	PM	2018-06-20	2018-06-27	Cage	Live	TRUE	FALSE	7							201.3						13.42	13
	Wht/Wht		1	61	PM	2018-06-20	2018-06-27	Cage	Live	TRUE	FALSE	7							198.2						13.42	13
	Wht/Wht		1	61	PM	2018-06-20	2018-06-27	Cage	Live	TRUE	FALSE	7							223.2						13.42	13
	Wht/Wht		1	61	PM	2018-06-20	2018-06-27	Cage	Live	TRUE	FALSE	7							195.2						13.42	13
	Wht/Wht		1	61	PM	2018-06-20	2018-06-27	Cage	Live	TRUE	FALSE	7							201.4						13.42	13
	Wht/Wht		1	61	PM	2018-06-20	2018-06-27	Cage	Live	TRUE	FALSE	7							226.1						13.42	13
	Wht/Wht		1	61	PM	2018-06-20	2018-06-27	Cage	Live	TRUE	FALSE	7							198.9						13.42	13
	Wht/Blu		1	71	PM	2018-06-20	2018-06-27	Cage	Live	TRUE	FALSE	7							223.8						12.98	4
	Wht/Prp		1	DLD	PM	2018-06-20	2018-06-27	Cage	Live	TRUE	FALSE	7							177.7						13.93	16
	Wht/Prp		1	DLD	PM	2018-06-20	2018-06-27	Cage	Live	TRUE	FALSE	7							214.7						13.93	16
	Blu/Prp		1	DLD	PM	2018-06-18	2018-06-27	Cage	Live	TRUE	FALSE	9							194.7						13.93	16
	Blu/Prp		1	DLD	PM	2018-06-18	2018-06-27	Cage	Live	TRUE	FALSE	9							207						13.93	16
	Blu/Yel		1	32	PM	2018-06-18	2018-06-27	Cage	Live	TRUE	FALSE	9							202						13.27	9
	Blu/Yel		1	32	PM	2018-06-18	2018-06-27	Cage	Live	TRUE	FALSE	9							177.6						13.27	9
	Pnk/Blu		1	71	PM	2018-06-19	2018-06-27	Cage	Live	TRUE	FALSE	8							266.3						12.98	4
	Pnk/Blu		1	71	PM	2018-06-19	2018-06-27	Cage	Live	TRUE	FALSE	8							223.8						12.98	4
	Pnk/Blu		1	71	PM	2018-06-19	2018-06-27	Cage	Live	TRUE	FALSE	8							204.9						12.98	4
	Pnk/Yel		1	32	PM	2018-06-19	2018-06-27	Cage	Live	TRUE	FALSE	8							217.5						13.27	9
	Pnk/Yel		1	32	PM	2018-06-19	2018-06-27	Cage	Live	TRUE	FALSE	8							231.5						13.27	9
	Pnk/Red		1	14	PM	2018-06-19	2018-06-27	Cage	Live	TRUE	FALSE	8							180.2						12.88	21
	Pnk/Red		1	14	PM	2018-06-19	2018-06-27	Cage	Live	TRUE	FALSE	8							199.2						12.88	21
	Pnk/Red		1	14	PM	2018-06-19	2018-06-27	Cage	Live	TRUE	FALSE	8							181.1						12.88	21
	Pnk/Red		1	14	PM	2018-06-19	2018-06-27	Cage	Live	TRUE	FALSE	8							175.2						12.88	21
	Pnk/Red		1	14	PM	2018-06-19	2018-06-27	Cage	Live	TRUE	FALSE	8							193.3						12.88	21
	Pnk/Red		1	14	PM	2018-06-19	2018-06-27	Cage	Live	TRUE	FALSE	8							177.2						12.88	21
	Pnk/Red		1	14	PM	2018-06-19	2018-06-27	Cage	Live	TRUE	FALSE	8							190.7						12.88	21
	Pnk/Red		1	14	PM	2018-06-19	2018-06-27	Cage	Live	TRUE	FALSE	8							188.1						12.88	21
	Pnk/Red		1	14	PM	2018-06-19	2018-06-27	Cage	Live	TRUE	FALSE	8							208.9						12.88	21
	Pnk/Red		1	14	PM	2018-06-19	2018-06-27	Cage	Live	TRUE	FALSE	8							183.4						12.88	21
	Pnk/Red		1	14	PM	2018-06-19	2018-06-27	Cage	Live	TRUE	FALSE	8							177.1						12.88	21
	Pnk/Red		1	14	PM	2018-06-19	2018-06-27	Cage	Live	TRUE	FALSE	8							177.2						12.88	21
	Pnk/Red		1	14	PM	2018-06-19	2018-06-27	Cage	Live	TRUE	FALSE	8							185.9						12.88	21
	Pnk/Red		1	14	PM	2018-06-19	2018-06-27	Cage	Live	TRUE	FALSE	8							194.7						12.88	21
	Pnk/Red		1	14	PM	2018-06-19	2018-06-27	Cage	Live	TRUE	FALSE	8							196.6						12.88	21
	Pnk/Red		1	14	PM	2018-06-19	2018-06-27	Cage	Live	TRUE	FALSE	8							178						12.88	21
	Pnk/Red		1	14	PM	2018-06-19	2018-06-27	Cage	Live	TRUE	FALSE	8							201.8						12.88	21
	Pnk/Red		1	14	PM	2018-06-19	2018-06-27	Cage	Live	TRUE	FALSE	8							172.8						12.88	21
	Pnk/Red		1	14	PM	2018-06-19	2018-06-27	Cage	Live	TRUE	FALSE	8							183.6						12.88	21
	Pnk/Red		1	14	PM	2018-06-19	2018-06-27	Cage	Live	TRUE	FALSE	8							179.5						12.88	21
	Pnk/Red		1	14	PM	2018-06-19	2018-06-27	Cage	Live	TRUE	FALSE	8							181.6						12.88	21
	Pnk/Red		1	14	PM	2018-06-19	2018-06-27	Cage	Live	TRUE	FALSE	8							195.3						12.88	21
	Pnk/Red		1	14	PM	2018-06-19	2018-06-27	Cage	Live	TRUE	FALSE	8							194.1						12.88	21
	Pnk/Red		1	14	PM	2018-06-19	2018-06-27	Cage	Live	TRUE	FALSE	8							185.2						12.88	21
	Pnk/Red		1	14	PM	2018-06-19	2018-06-27	Cage	Live	TRUE	FALSE	8							199.5						12.88	21
	Pnk/Red		1	14	PM	2018-06-19	2018-06-27	Cage	Live	TRUE	FALSE	8							199.9						12.88	21
	Pnk/Red		1	14	PM	2018-06-19	2018-06-27	Cage	Live	TRUE	FALSE	8							207.2						12.88	21
	Pnk/Red		1	14	PM	2018-06-19	2018-06-27	Cage	Live	TRUE	FALSE	8							213.7						12.88	21
	Pnk/Red		1	14	PM	2018-06-19	2018-06-27	Cage	Live	TRUE	FALSE	8							207.7						12.88	21
	Pnk/Red		1	14	PM	2018-06-19	2018-06-27	Cage	Live	TRUE	FALSE	8							185.9						12.88	21
	Pnk/Red		1	14	PM	2018-06-19	2018-06-27	Cage	Live	TRUE	FALSE	8							198.7						12.88	21
	Pnk/Red		1	14	PM	2018-06-19	2018-06-27	Cage	Live	TRUE	FALSE	8							178.1						12.88	21
	Pnk/Red		1	14	PM	2018-06-19	2018-06-27	Cage	Live	TRUE	FALSE	8							175.4						12.88	21
	Pnk/Red		1	14	PM	2018-06-19	2018-06-27	Cage	Live	TRUE	FALSE	8							184.1						12.88	21
	Pnk/Red		1	14	PM	2018-06-19	2018-06-27	Cage	Live	TRUE	FALSE	8							195						12.88	21
	Pnk/Red		1	14	PM	2018-06-19	2018-06-27	Cage	Live	TRUE	FALSE	8							182.8						12.88	21
	Pnk/Red		1	14	PM	2018-06-19	2018-06-27	Cage	Live	TRUE	FALSE	8							191.7						12.88	21
	Pnk/Red		1	14	PM	2018-06-19	2018-06-27	Cage	Live	TRUE	FALSE	8							188.4						12.88	21
	Pnk/Grn		1	16	PM	2018-06-19	2018-06-27	Cage	Live	TRUE	FALSE	8							228.9						13.33	3
	Pnk/Grn		1	16	PM	2018-06-19	2018-06-27	Cage	Live	TRUE	FALSE	8							226.7						13.33	3
	Pnk/Grn		1	16	PM	2018-06-19	2018-06-27	Cage	Live	TRUE	FALSE	8							225.9						13.33	3
	Pnk/Grn		1	16	PM	2018-06-19	2018-06-27	Cage	Live	TRUE	FALSE	8							221.7						13.33	3
	Pnk/Grn		1	16	PM	2018-06-19	2018-06-27	Cage	Live	TRUE	FALSE	8							213.7						13.33	3
	Pnk/Grn		1	16	PM	2018-06-19	2018-06-27	Cage	Live	TRUE	FALSE	8							217.3						13.33	3
	Pnk/Grn		1	16	PM	2018-06-19	2018-06-27	Cage	Live	TRUE	FALSE	8							201.8						13.33	3
	Pnk/Grn		1	16	PM	2018-06-19	2018-06-27	Cage	Live	TRUE	FALSE	8							237						13.33	3
	Pnk/Grn		1	16	PM	2018-06-19	2018-06-27	Cage	Live	TRUE	FALSE	8							228.5						13.33	3
	Pnk/Grn		1	16	PM	2018-06-19	2018-06-27	Cage	Live	TRUE	FALSE	8							221.8						13.33	3
	Pnk/Grn		1	16	PM	2018-06-19	2018-06-27	Cage	Live	TRUE	FALSE	8							214.2						13.33	3
	Pnk/Grn		1	16	PM	2018-06-19	2018-06-27	Cage	Live	TRUE	FALSE	8							212.8						13.33	3
	Pnk/Grn		1	16	PM	2018-06-19	2018-06-27	Cage	Live	TRUE	FALSE	8							209.3						13.33	3
	Pnk/Grn		1	16	PM	2018-06-19	2018-06-27	Cage	Live	TRUE	FALSE	8							226.6						13.33	3
	Pnk/Grn		1	16	PM	2018-06-19	2018-06-27	Cage	Live	TRUE	FALSE	8							224.5						13.33	3
	Pnk/Grn		1	16	PM	2018-06-19	2018-06-27	Cage	Live	TRUE	FALSE	8							219.1						13.33	3
	Pnk/Grn		1	16	PM	2018-06-19	2018-06-27	Cage	Live	TRUE	FALSE	8							209.9						13.33	3
	Pnk/Grn		1	16	PM	2018-06-19	2018-06-27	Cage	Live	TRUE	FALSE	8							228.6						13.33	3
	Pnk/Grn		1	16	PM	2018-06-19	2018-06-27	Cage	Live	TRUE	FALSE	8							230.1						13.33	3
	Pnk/Grn		1	16	PM	2018-06-19	2018-06-27	Cage	Live	TRUE	FALSE	8							240.2						13.33	3
	Pnk/Grn		1	16	PM	2018-06-19	2018-06-27	Cage	Live	TRUE	FALSE	8							234						13.33	3
	Pnk/Grn		1	16	PM	2018-06-19	2018-06-27	Cage	Live	TRUE	FALSE	8							245.6						13.33	3
	Pnk/Grn		1	16	PM	2018-06-19	2018-06-27	Cage	Live	TRUE	FALSE	8							244.9						13.33	3
	Pnk/Grn		1	16	PM	2018-06-19	2018-06-27	Cage	Live	TRUE	FALSE	8							206.4						13.33	3
	Pnk/Prp		1	DLD	PM	2018-06-19	2018-06-27	Cage	Live	TRUE	FALSE	8							191.9						13.93	16
	Pnk/Prp		1	DLD	PM	2018-06-19	2018-06-27	Cage	Live	TRUE	FALSE	8							194.6						13.93	16
	Pnk/Prp		1	DLD	PM	2018-06-19	2018-06-27	Cage	Live	TRUE	FALSE	8							187.6						13.93	16
	Pnk/Prp		1	DLD	PM	2018-06-19	2018-06-27	Cage	Live	TRUE	FALSE	8							183.7						13.93	16
	Pnk/Prp		1	DLD	PM	2018-06-19	2018-06-27	Cage	Live	TRUE	FALSE	8							197						13.93	16
	Pnk/Prp		1	DLD	PM	2018-06-19	2018-06-27	Cage	Live	TRUE	FALSE	8							190.3						13.93	16
	Pnk/Prp		1	DLD	PM	2018-06-19	2018-06-27	Cage	Live	TRUE	FALSE	8							192.3						13.93	16
	Pnk/Prp		1	DLD	PM	2018-06-19	2018-06-27	Cage	Live	TRUE	FALSE	8							213.6						13.93	16
	Pnk/Prp		1	DLD	PM	2018-06-19	2018-06-27	Cage	Live	TRUE	FALSE	8							196.3						13.93	16
	Pnk/Prp		1	DLD	PM	2018-06-19	2018-06-27	Cage	Live	TRUE	FALSE	8							186.3						13.93	16
	Pnk/Prp		1	DLD	PM	2018-06-19	2018-06-27	Cage	Live	TRUE	FALSE	8							187.6						13.93	16
	Pnk/Prp		1	DLD	PM	2018-06-19	2018-06-27	Cage	Live	TRUE	FALSE	8							201.6						13.93	16
	Pnk/Prp		1	DLD	PM	2018-06-19	2018-06-27	Cage	Live	TRUE	FALSE	8							194.9						13.93	16
	Pnk/Prp		1	DLD	PM	2018-06-19	2018-06-27	Cage	Live	TRUE	FALSE	8							191.9						13.93	16
	Pnk/Prp		1	DLD	PM	2018-06-19	2018-06-27	Cage	Live	TRUE	FALSE	8							184.3						13.93	16
	Pnk/Prp		1	DLD	PM	2018-06-19	2018-06-27	Cage	Live	TRUE	FALSE	8							146.6						13.93	16
	Pnk/Prp		1	DLD	PM	2018-06-19	2018-06-27	Cage	Live	TRUE	FALSE	8							201.8						13.93	16
	Pnk/Prp		1	DLD	PM	2018-06-19	2018-06-27	Cage	Live	TRUE	FALSE	8							195.5						13.93	16
	Pnk/Prp		1	DLD	PM	2018-06-19	2018-06-27	Cage	Live	TRUE	FALSE	8							201.8						13.93	16
	Pnk/Prp		1	DLD	PM	2018-06-19	2018-06-27	Cage	Live	TRUE	FALSE	8							190						13.93	16
	Pnk/Prp		1	DLD	PM	2018-06-19	2018-06-27	Cage	Live	TRUE	FALSE	8							199.6						13.93	16
	Pnk/Prp		1	DLD	PM	2018-06-19	2018-06-27	Cage	Live	TRUE	FALSE	8							198.5						13.93	16
	Pnk/Prp		1	DLD	PM	2018-06-19	2018-06-27	Cage	Live	TRUE	FALSE	8							280.7						13.93	16
	Pnk/Prp		1	DLD	PM	2018-06-19	2018-06-27	Cage	Live	TRUE	FALSE	8							211.4						13.93	16
	Pnk/Prp		1	DLD	PM	2018-06-19	2018-06-27	Cage	Live	TRUE	FALSE	8							191.6						13.93	16
	Pnk/Prp		1	DLD	PM	2018-06-19	2018-06-27	Cage	Live	TRUE	FALSE	8							204.1						13.93	16
	Pnk/Prp		1	DLD	PM	2018-06-19	2018-06-27	Cage	Live	TRUE	FALSE	8							191						13.93	16
	Blu/Wht		1	61	AM	2018-06-18	2018-06-27	Cage	Live	TRUE	FALSE	9.5							174.6						13.42	13
	Blu/Wht		1	61	AM	2018-06-18	2018-06-27	Cage	Live	TRUE	FALSE	9.5							181.7						13.42	13
	Blu/Wht		1	61	AM	2018-06-18	2018-06-27	Cage	Live	TRUE	FALSE	9.5							193						13.42	13
	Blu/Wht		1	61	AM	2018-06-18	2018-06-27	Cage	Live	TRUE	FALSE	9.5							161.5						13.42	13
	Blu/Wht		1	61	AM	2018-06-18	2018-06-27	Cage	Live	TRUE	FALSE	9.5							172.4						13.42	13
	Blu/Yel		1	32	AM	2018-06-18	2018-06-27	Cage	Live	TRUE	FALSE	9.5							204.9						13.27	9
	Pnk/Red		1	14	AM	2018-06-19	2018-06-27	Cage	Live	TRUE	FALSE	8.5							177.9						12.88	21
	Pnk/Red		1	14	AM	2018-06-19	2018-06-27	Cage	Live	TRUE	FALSE	8.5							171.2						12.88	21
	Pnk/Red		1	14	AM	2018-06-19	2018-06-27	Cage	Live	TRUE	FALSE	8.5							160.3						12.88	21
	Pnk/Red		1	14	AM	2018-06-19	2018-06-27	Cage	Live	TRUE	FALSE	8.5							194.2						12.88	21
	Pnk/Red		1	14	AM	2018-06-19	2018-06-27	Cage	Live	TRUE	FALSE	8.5							180.4						12.88	21
	Pnk/Red		1	14	AM	2018-06-19	2018-06-27	Cage	Live	TRUE	FALSE	8.5							177.8						12.88	21
	Pnk/Red		1	14	AM	2018-06-19	2018-06-27	Cage	Live	TRUE	FALSE	8.5							170.2						12.88	21
	Pnk/Red		1	14	AM	2018-06-19	2018-06-27	Cage	Live	TRUE	FALSE	8.5							168.4						12.88	21
	Pnk/Red		1	14	AM	2018-06-19	2018-06-27	Cage	Live	TRUE	FALSE	8.5							184.2						12.88	21
	Pnk/Red		1	14	AM	2018-06-19	2018-06-27	Cage	Live	TRUE	FALSE	8.5							177.2						12.88	21
	Pnk/Red		1	14	AM	2018-06-19	2018-06-27	Cage	Live	TRUE	FALSE	8.5							187.7						12.88	21
	Pnk/Red		1	14	AM	2018-06-19	2018-06-27	Cage	Live	TRUE	FALSE	8.5							157.7						12.88	21
	Pnk/Red		1	14	AM	2018-06-19	2018-06-27	Cage	Live	TRUE	FALSE	8.5							174.3						12.88	21
	Pnk/Red		1	14	AM	2018-06-19	2018-06-27	Cage	Live	TRUE	FALSE	8.5							182.9						12.88	21
	Pnk/Red		1	14	AM	2018-06-19	2018-06-27	Cage	Live	TRUE	FALSE	8.5							202.2						12.88	21
	Pnk/Red		1	14	AM	2018-06-19	2018-06-27	Cage	Live	TRUE	FALSE	8.5							193.3						12.88	21
	Pnk/Red		1	14	AM	2018-06-19	2018-06-27	Cage	Live	TRUE	FALSE	8.5							167.2						12.88	21
	Pnk/Red		1	14	AM	2018-06-19	2018-06-27	Cage	Live	TRUE	FALSE	8.5							195.3						12.88	21
	Pnk/Red		1	14	AM	2018-06-19	2018-06-27	Cage	Live	TRUE	FALSE	8.5							181.2						12.88	21
	Pnk/Red		1	14	AM	2018-06-19	2018-06-27	Cage	Live	TRUE	FALSE	8.5							186.6						12.88	21
	Pnk/Red		1	14	AM	2018-06-19	2018-06-27	Cage	Live	TRUE	FALSE	8.5							185						12.88	21
	Pnk/Red		1	14	AM	2018-06-19	2018-06-27	Cage	Live	TRUE	FALSE	8.5							184.9						12.88	21
	Pnk/Red		1	14	AM	2018-06-19	2018-06-27	Cage	Live	TRUE	FALSE	8.5							179.8						12.88	21
	Pnk/Prp		1	DLD	AM	2018-06-19	2018-06-27	Cage	Live	TRUE	FALSE	8.5							184.9						13.93	16
	Pnk/Prp		1	DLD	AM	2018-06-19	2018-06-27	Cage	Live	TRUE	FALSE	8.5							186.7						13.93	16
	Pnk/Prp		1	DLD	AM	2018-06-19	2018-06-27	Cage	Live	TRUE	FALSE	8.5							219.1						13.93	16
	Pnk/Prp		1	DLD	AM	2018-06-19	2018-06-27	Cage	Live	TRUE	FALSE	8.5							178.8						13.93	16
	Pnk/Prp		1	DLD	AM	2018-06-19	2018-06-27	Cage	Live	TRUE	FALSE	8.5							189.6						13.93	16
	Pnk/Prp		1	DLD	AM	2018-06-19	2018-06-27	Cage	Live	TRUE	FALSE	8.5							201.8						13.93	16
	Pnk/Prp		1	DLD	AM	2018-06-19	2018-06-27	Cage	Live	TRUE	FALSE	8.5							165						13.93	16
	Pnk/Prp		1	DLD	AM	2018-06-19	2018-06-27	Cage	Live	TRUE	FALSE	8.5							208.8						13.93	16
	Pnk/Prp		1	DLD	AM	2018-06-19	2018-06-27	Cage	Live	TRUE	FALSE	8.5							190.4						13.93	16
	Pnk/Prp		1	DLD	AM	2018-06-19	2018-06-27	Cage	Live	TRUE	FALSE	8.5							195.7						13.93	16
	Pnk/Prp		1	DLD	AM	2018-06-19	2018-06-27	Cage	Live	TRUE	FALSE	8.5							197.5						13.93	16
	Pnk/Prp		1	DLD	AM	2018-06-19	2018-06-27	Cage	Live	TRUE	FALSE	8.5							159.5						13.93	16
	Pnk/Prp		1	DLD	AM	2018-06-19	2018-06-27	Cage	Live	TRUE	FALSE	8.5							169						13.93	16
	Pnk/Prp		1	DLD	AM	2018-06-19	2018-06-27	Cage	Live	TRUE	FALSE	8.5							200.8						13.93	16
	Pnk/Prp		1	DLD	AM	2018-06-19	2018-06-27	Cage	Live	TRUE	FALSE	8.5							187.2						13.93	16
	Pnk/Prp		1	DLD	AM	2018-06-19	2018-06-27	Cage	Live	TRUE	FALSE	8.5							202.7						13.93	16
	Pnk/Prp		1	DLD	AM	2018-06-19	2018-06-27	Cage	Live	TRUE	FALSE	8.5							214.7						13.93	16
	Pnk/Prp		1	DLD	AM	2018-06-19	2018-06-27	Cage	Live	TRUE	FALSE	8.5							191.8						13.93	16
	Pnk/Prp		1	DLD	AM	2018-06-19	2018-06-27	Cage	Live	TRUE	FALSE	8.5							181.1						13.93	16
	Pnk/Prp		1	DLD	AM	2018-06-19	2018-06-27	Cage	Live	TRUE	FALSE	8.5							193.2						13.93	16
	Pnk/Prp		1	DLD	AM	2018-06-19	2018-06-27	Cage	Live	TRUE	FALSE	8.5							184.8						13.93	16
	Pnk/Prp		1	DLD	AM	2018-06-19	2018-06-27	Cage	Live	TRUE	FALSE	8.5							172.9						13.93	16
	Pnk/Yel		1	32	AM	2018-06-19	2018-06-27	Cage	Live	TRUE	FALSE	8.5							185.5						13.27	9
	Pnk/Yel		1	32	AM	2018-06-19	2018-06-27	Cage	Live	TRUE	FALSE	8.5							184.3						13.27	9
	Pnk/Grn		1	16	AM	2018-06-19	2018-06-27	Cage	Live	TRUE	FALSE	8.5							192.5						13.33	3
	Pnk/Grn		1	16	AM	2018-06-19	2018-06-27	Cage	Live	TRUE	FALSE	8.5							200.6						13.33	3
	Pnk/Blu		1	71	AM	2018-06-19	2018-06-27	Cage	Live	TRUE	FALSE	8.5							206.5						12.98	4
	Pnk/Blu		1	71	AM	2018-06-19	2018-06-27	Cage	Live	TRUE	FALSE	8.5							211.8						12.98	4
	Pnk/Blu		1	71	AM	2018-06-19	2018-06-27	Cage	Live	TRUE	FALSE	8.5							220						12.98	4
	Pnk/Blu		1	71	AM	2018-06-19	2018-06-27	Cage	Live	TRUE	FALSE	8.5							211.5						12.98	4
	Pnk/Blu		1	71	AM	2018-06-19	2018-06-27	Cage	Live	TRUE	FALSE	8.5							239						12.98	4
	Pnk/Blu		1	71	AM	2018-06-19	2018-06-27	Cage	Live	TRUE	FALSE	8.5							196.5						12.98	4
	Pnk/Blu		1	71	AM	2018-06-19	2018-06-27	Cage	Live	TRUE	FALSE	8.5							210						12.98	4
	Pnk/Blu		1	71	AM	2018-06-19	2018-06-27	Cage	Live	TRUE	FALSE	8.5							205.5						12.98	4
	Gry/Yel		1	32	AM	2018-06-21	2018-06-27	Cage	Live	TRUE	FALSE	6.5							204.4						13.27	9
	Gry/Yel		1	32	AM	2018-06-21	2018-06-27	Cage	Live	TRUE	FALSE	6.5							187.3						13.27	9
	Gry/Yel		1	32	AM	2018-06-21	2018-06-27	Cage	Live	TRUE	FALSE	6.5							182.6						13.27	9
	Gry/Red		1	14	AM	2018-06-21	2018-06-27	Cage	Live	TRUE	FALSE	6.5							189.9						12.88	21
	Gry/Red		1	14	AM	2018-06-21	2018-06-27	Cage	Live	TRUE	FALSE	6.5							192						12.88	21
	Gry/Red		1	14	AM	2018-06-21	2018-06-27	Cage	Live	TRUE	FALSE	6.5							191.4						12.88	21
	Gry/Red		1	14	AM	2018-06-21	2018-06-27	Cage	Live	TRUE	FALSE	6.5							225.7						12.88	21
	Gry/Red		1	14	AM	2018-06-21	2018-06-27	Cage	Live	TRUE	FALSE	6.5							177.9						12.88	21
	Gry/Red		1	14	AM	2018-06-21	2018-06-27	Cage	Live	TRUE	FALSE	6.5							167.3						12.88	21
	Gry/Red		1	14	AM	2018-06-21	2018-06-27	Cage	Live	TRUE	FALSE	6.5							203						12.88	21
	Gry/Red		1	14	AM	2018-06-21	2018-06-27	Cage	Live	TRUE	FALSE	6.5							180.7						12.88	21
	Gry/Red		1	14	AM	2018-06-21	2018-06-27	Cage	Live	TRUE	FALSE	6.5							191.8						12.88	21
	Gry/Wht		1	61	AM	2018-06-21	2018-06-27	Cage	Live	TRUE	FALSE	6.5							172.7						13.42	13
	Gry/Wht		1	61	AM	2018-06-21	2018-06-27	Cage	Live	TRUE	FALSE	6.5							199.5						13.42	13
	Gry/Wht		1	61	AM	2018-06-21	2018-06-27	Cage	Live	TRUE	FALSE	6.5							209.8						13.42	13
	Gry/Wht		1	61	AM	2018-06-21	2018-06-27	Cage	Live	TRUE	FALSE	6.5							198.5						13.42	13
	Gry/Wht		1	61	AM	2018-06-21	2018-06-27	Cage	Live	TRUE	FALSE	6.5							190.6						13.42	13
	Gry/Wht		1	61	AM	2018-06-21	2018-06-27	Cage	Live	TRUE	FALSE	6.5							196.8						13.42	13
	Gry/Wht		1	61	AM	2018-06-21	2018-06-27	Cage	Live	TRUE	FALSE	6.5							211.3						13.42	13
	Gry/Wht		1	61	AM	2018-06-21	2018-06-27	Cage	Live	TRUE	FALSE	6.5							211.6						13.42	13
	Gry/Wht		1	61	AM	2018-06-21	2018-06-27	Cage	Live	TRUE	FALSE	6.5							173.4						13.42	13
	Gry/Wht		1	61	AM	2018-06-21	2018-06-27	Cage	Live	TRUE	FALSE	6.5							188.3						13.42	13
	Gry/Wht		1	61	AM	2018-06-21	2018-06-27	Cage	Live	TRUE	FALSE	6.5							172.7						13.42	13
	Gry/Wht		1	61	AM	2018-06-21	2018-06-27	Cage	Live	TRUE	FALSE	6.5							200.2						13.42	13
	Gry/Wht		1	61	AM	2018-06-21	2018-06-27	Cage	Live	TRUE	FALSE	6.5							206.8						13.42	13
	Gry/Wht		1	61	AM	2018-06-21	2018-06-27	Cage	Live	TRUE	FALSE	6.5							201.7						13.42	13
	Gry/Blu		1	71	AM	2018-06-21	2018-06-27	Cage	Live	TRUE	FALSE	6.5							179.9						12.98	4
	Gry/Blu		1	71	AM	2018-06-21	2018-06-27	Cage	Live	TRUE	FALSE	6.5							229.6						12.98	4
	Gry/Blu		1	71	AM	2018-06-21	2018-06-27	Cage	Live	TRUE	FALSE	6.5							220.9						12.98	4
	Gry/Blu		1	71	AM	2018-06-21	2018-06-27	Cage	Live	TRUE	FALSE	6.5							216.3						12.98	4
	Gry/Blu		1	71	AM	2018-06-21	2018-06-27	Cage	Live	TRUE	FALSE	6.5							210						12.98	4
	Gry/Grn		1	16	AM	2018-06-21	2018-06-27	Cage	Live	TRUE	FALSE	6.5							208.5						13.33	3
	Gry/Grn		1	16	AM	2018-06-21	2018-06-27	Cage	Live	TRUE	FALSE	6.5							232.5						13.33	3
	Gry/Grn		1	16	AM	2018-06-21	2018-06-27	Cage	Live	TRUE	FALSE	6.5							222.5						13.33	3
	Gry/Prp		1	DLD	AM	2018-06-21	2018-06-27	Cage	Live	TRUE	FALSE	6.5							166.8						13.93	16
	Gry/Prp		1	DLD	AM	2018-06-21	2018-06-27	Cage	Live	TRUE	FALSE	6.5							193.3						13.93	16
	Gry/Prp		1	DLD	AM	2018-06-21	2018-06-27	Cage	Live	TRUE	FALSE	6.5							201.6						13.93	16
	Gry/Prp		1	DLD	AM	2018-06-21	2018-06-27	Cage	Live	TRUE	FALSE	6.5							172.1						13.93	16
	Wht/Red		1	14	AM	2018-06-20	2018-06-27	Cage	Live	TRUE	FALSE	7.5							202						12.88	21
	Wht/Red		1	14	AM	2018-06-20	2018-06-27	Cage	Live	TRUE	FALSE	7.5							166						12.88	21
	Wht/Red		1	14	AM	2018-06-20	2018-06-27	Cage	Live	TRUE	FALSE	7.5							185.7						12.88	21
	Wht/Red		1	14	AM	2018-06-20	2018-06-27	Cage	Live	TRUE	FALSE	7.5							183.6						12.88	21
	Wht/Red		1	14	AM	2018-06-20	2018-06-27	Cage	Live	TRUE	FALSE	7.5							195.6						12.88	21
	Wht/Red		1	14	AM	2018-06-20	2018-06-27	Cage	Live	TRUE	FALSE	7.5							192.4						12.88	21
	Wht/Red		1	14	AM	2018-06-20	2018-06-27	Cage	Live	TRUE	FALSE	7.5							188.5						12.88	21
	Wht/Red		1	14	AM	2018-06-20	2018-06-27	Cage	Live	TRUE	FALSE	7.5							187.7						12.88	21
	Wht/Red		1	14	AM	2018-06-20	2018-06-27	Cage	Live	TRUE	FALSE	7.5							182.2						12.88	21
	Wht/Red		1	14	AM	2018-06-20	2018-06-27	Cage	Live	TRUE	FALSE	7.5							176.5						12.88	21
	Wht/Red		1	14	AM	2018-06-20	2018-06-27	Cage	Live	TRUE	FALSE	7.5							198.7						12.88	21
	Wht/Red		1	14	AM	2018-06-20	2018-06-27	Cage	Live	TRUE	FALSE	7.5							195						12.88	21
	Wht/Red		1	14	AM	2018-06-20	2018-06-27	Cage	Live	TRUE	FALSE	7.5							174						12.88	21
	Wht/Red		1	14	AM	2018-06-20	2018-06-27	Cage	Live	TRUE	FALSE	7.5							167.2						12.88	21
	Wht/Red		1	14	AM	2018-06-20	2018-06-27	Cage	Live	TRUE	FALSE	7.5							185.5						12.88	21
	Wht/Red		1	14	AM	2018-06-20	2018-06-27	Cage	Live	TRUE	FALSE	7.5							188						12.88	21
	Wht/Red		1	14	AM	2018-06-20	2018-06-27	Cage	Live	TRUE	FALSE	7.5							201.8						12.88	21
	Wht/Red		1	14	AM	2018-06-20	2018-06-27	Cage	Live	TRUE	FALSE	7.5							194.5						12.88	21
	Wht/Red		1	14	AM	2018-06-20	2018-06-27	Cage	Live	TRUE	FALSE	7.5							164.3						12.88	21
	Wht/Red		1	14	AM	2018-06-20	2018-06-27	Cage	Live	TRUE	FALSE	7.5							164.9						12.88	21
	Wht/Red		1	14	AM	2018-06-20	2018-06-27	Cage	Live	TRUE	FALSE	7.5							171.5						12.88	21
	Wht/Red		1	14	AM	2018-06-20	2018-06-27	Cage	Live	TRUE	FALSE	7.5							155.4						12.88	21
	Wht/Red		1	14	AM	2018-06-20	2018-06-27	Cage	Live	TRUE	FALSE	7.5							165.3						12.88	21
	Wht/Red		1	14	AM	2018-06-20	2018-06-27	Cage	Live	TRUE	FALSE	7.5							199.8						12.88	21
	Wht/Red		1	14	AM	2018-06-20	2018-06-27	Cage	Live	TRUE	FALSE	7.5							192.1						12.88	21
	Wht/Red		1	14	AM	2018-06-20	2018-06-27	Cage	Live	TRUE	FALSE	7.5							196.6						12.88	21
	Wht/Red		1	14	AM	2018-06-20	2018-06-27	Cage	Live	TRUE	FALSE	7.5							192.6						12.88	21
	Wht/Red		1	14	AM	2018-06-20	2018-06-27	Cage	Live	TRUE	FALSE	7.5							174						12.88	21
	Wht/Red		1	14	AM	2018-06-20	2018-06-27	Cage	Live	TRUE	FALSE	7.5							175.8						12.88	21
	Wht/Red		1	14	AM	2018-06-20	2018-06-27	Cage	Live	TRUE	FALSE	7.5							188						12.88	21
	Wht/Red		1	14	AM	2018-06-20	2018-06-27	Cage	Live	TRUE	FALSE	7.5							176.5						12.88	21
	Wht/Prp		1	DLD	AM	2018-06-20	2018-06-27	Cage	Live	TRUE	FALSE	7.5							191.7						13.93	16
	Wht/Prp		1	DLD	AM	2018-06-20	2018-06-27	Cage	Live	TRUE	FALSE	7.5							184.5						13.93	16
	Wht/Prp		1	DLD	AM	2018-06-20	2018-06-27	Cage	Live	TRUE	FALSE	7.5							176.3						13.93	16
	Wht/Prp		1	DLD	AM	2018-06-20	2018-06-27	Cage	Live	TRUE	FALSE	7.5							199.4						13.93	16
	Wht/Prp		1	DLD	AM	2018-06-20	2018-06-27	Cage	Live	TRUE	FALSE	7.5							187.6						13.93	16
	Wht/Prp		1	DLD	AM	2018-06-20	2018-06-27	Cage	Live	TRUE	FALSE	7.5							206.9						13.93	16
	Wht/Prp		1	DLD	AM	2018-06-20	2018-06-27	Cage	Live	TRUE	FALSE	7.5							198.2						13.93	16
	Wht/Prp		1	DLD	AM	2018-06-20	2018-06-27	Cage	Live	TRUE	FALSE	7.5							181.2						13.93	16
	Wht/Prp		1	DLD	AM	2018-06-20	2018-06-27	Cage	Live	TRUE	FALSE	7.5							169						13.93	16
	Wht/Prp		1	DLD	AM	2018-06-20	2018-06-27	Cage	Live	TRUE	FALSE	7.5							189.4						13.93	16
	Wht/Prp		1	DLD	AM	2018-06-20	2018-06-27	Cage	Live	TRUE	FALSE	7.5							210						13.93	16
	Wht/Prp		1	DLD	AM	2018-06-20	2018-06-27	Cage	Live	TRUE	FALSE	7.5							175						13.93	16
	Wht/Prp		1	DLD	AM	2018-06-20	2018-06-27	Cage	Live	TRUE	FALSE	7.5							183.5						13.93	16
	Wht/Prp		1	DLD	AM	2018-06-20	2018-06-27	Cage	Live	TRUE	FALSE	7.5							184.8						13.93	16
	Wht/Prp		1	DLD	AM	2018-06-20	2018-06-27	Cage	Live	TRUE	FALSE	7.5							192.5						13.93	16
	Wht/Prp		1	DLD	AM	2018-06-20	2018-06-27	Cage	Live	TRUE	FALSE	7.5							164.2						13.93	16
	Wht/Prp		1	DLD	AM	2018-06-20	2018-06-27	Cage	Live	TRUE	FALSE	7.5							199						13.93	16
	Wht/Blu		1	71	AM	2018-06-20	2018-06-27	Cage	Live	TRUE	FALSE	7.5							191.6						12.98	4
	Wht/Blu		1	71	AM	2018-06-20	2018-06-27	Cage	Live	TRUE	FALSE	7.5							237.2						12.98	4
	Wht/Blu		1	71	AM	2018-06-20	2018-06-27	Cage	Live	TRUE	FALSE	7.5							200.5						12.98	4
	Wht/Blu		1	71	AM	2018-06-20	2018-06-27	Cage	Live	TRUE	FALSE	7.5							207.1						12.98	4
	Wht/Blu		1	71	AM	2018-06-20	2018-06-27	Cage	Live	TRUE	FALSE	7.5							206.4						12.98	4
	Wht/Blu		1	71	AM	2018-06-20	2018-06-27	Cage	Live	TRUE	FALSE	7.5							219.9						12.98	4
	Wht/Blu		1	71	AM	2018-06-20	2018-06-27	Cage	Live	TRUE	FALSE	7.5							211.6						12.98	4
	Wht/Blu		1	71	AM	2018-06-20	2018-06-27	Cage	Live	TRUE	FALSE	7.5							238.4						12.98	4
	Wht/Blu		1	71	AM	2018-06-20	2018-06-27	Cage	Live	TRUE	FALSE	7.5							200.2						12.98	4
	Wht/Blu		1	71	AM	2018-06-20	2018-06-27	Cage	Live	TRUE	FALSE	7.5							201.8						12.98	4
	Wht/Blu		1	71	AM	2018-06-20	2018-06-27	Cage	Live	TRUE	FALSE	7.5							220.2						12.98	4
	Wht/Blu		1	71	AM	2018-06-20	2018-06-27	Cage	Live	TRUE	FALSE	7.5							208						12.98	4
	Wht/Blu		1	71	AM	2018-06-20	2018-06-27	Cage	Live	TRUE	FALSE	7.5							196.2						12.98	4
	Wht/Blu		1	71	AM	2018-06-20	2018-06-27	Cage	Live	TRUE	FALSE	7.5							200.4						12.98	4
	Wht/Blu		1	71	AM	2018-06-20	2018-06-27	Cage	Live	TRUE	FALSE	7.5							242.5						12.98	4
	Wht/Blu		1	71	AM	2018-06-20	2018-06-27	Cage	Live	TRUE	FALSE	7.5							217.6						12.98	4
	Wht/Blu		1	71	AM	2018-06-20	2018-06-27	Cage	Live	TRUE	FALSE	7.5							202						12.98	4
	Wht/Grn		1	16	AM	2018-06-20	2018-06-27	Cage	Live	TRUE	FALSE	7.5							214.5						13.33	3
	Wht/Grn		1	16	AM	2018-06-20	2018-06-27	Cage	Live	TRUE	FALSE	7.5							215.3						13.33	3
	Wht/Grn		1	16	AM	2018-06-20	2018-06-27	Cage	Live	TRUE	FALSE	7.5							222						13.33	3
	Wht/Grn		1	16	AM	2018-06-20	2018-06-27	Cage	Live	TRUE	FALSE	7.5							248.3						13.33	3
	Wht/Grn		1	16	AM	2018-06-20	2018-06-27	Cage	Live	TRUE	FALSE	7.5							199						13.33	3
	Wht/Grn		1	16	AM	2018-06-20	2018-06-27	Cage	Live	TRUE	FALSE	7.5							211						13.33	3
	Wht/Grn		1	16	AM	2018-06-20	2018-06-27	Cage	Live	TRUE	FALSE	7.5							198.2						13.33	3
	Wht/Grn		1	16	AM	2018-06-20	2018-06-27	Cage	Live	TRUE	FALSE	7.5							209.7						13.33	3
	Wht/Grn		1	16	AM	2018-06-20	2018-06-27	Cage	Live	TRUE	FALSE	7.5							201.7						13.33	3
	Wht/Grn		1	16	AM	2018-06-20	2018-06-27	Cage	Live	TRUE	FALSE	7.5							234						13.33	3
	Wht/Grn		1	16	AM	2018-06-20	2018-06-27	Cage	Live	TRUE	FALSE	7.5							197.5						13.33	3
	Wht/Grn		1	16	AM	2018-06-20	2018-06-27	Cage	Live	TRUE	FALSE	7.5							209.4						13.33	3
	Wht/Grn		1	16	AM	2018-06-20	2018-06-27	Cage	Live	TRUE	FALSE	7.5							208.8						13.33	3
	Wht/Grn		1	16	AM	2018-06-20	2018-06-27	Cage	Live	TRUE	FALSE	7.5							229.4						13.33	3
	Wht/Grn		1	16	AM	2018-06-20	2018-06-27	Cage	Live	TRUE	FALSE	7.5							206.2						13.33	3
	Wht/Grn		1	16	AM	2018-06-20	2018-06-27	Cage	Live	TRUE	FALSE	7.5							231.4						13.33	3
	Wht/Grn		1	16	AM	2018-06-20	2018-06-27	Cage	Live	TRUE	FALSE	7.5							197.3						13.33	3
	Wht/Wht		1	61	AM	2018-06-20	2018-06-27	Cage	Live	TRUE	FALSE	7.5							181.5						13.42	13
	Wht/Wht		1	61	AM	2018-06-20	2018-06-27	Cage	Live	TRUE	FALSE	7.5							185.6						13.42	13
	Wht/Wht		1	61	AM	2018-06-20	2018-06-27	Cage	Live	TRUE	FALSE	7.5							204.9						13.42	13
	Wht/Wht		1	61	AM	2018-06-20	2018-06-27	Cage	Live	TRUE	FALSE	7.5							220.1						13.42	13
	Wht/Wht		1	61	AM	2018-06-20	2018-06-27	Cage	Live	TRUE	FALSE	7.5							180.2						13.42	13
	Wht/Wht		1	61	AM	2018-06-20	2018-06-27	Cage	Live	TRUE	FALSE	7.5							206.4						13.42	13
	Wht/Wht		1	61	AM	2018-06-20	2018-06-27	Cage	Live	TRUE	FALSE	7.5							201.1						13.42	13
	Wht/Wht		1	61	AM	2018-06-20	2018-06-27	Cage	Live	TRUE	FALSE	7.5							191.6						13.42	13
	Wht/Wht		1	61	AM	2018-06-20	2018-06-27	Cage	Live	TRUE	FALSE	7.5							192.2						13.42	13
	Wht/Red		1	14	AM	2018-06-20	2018-06-28	Cage	Live	TRUE	FALSE	8.5							189.4						12.88	21
	Wht/Red		1	14	AM	2018-06-20	2018-06-28	Cage	Live	TRUE	FALSE	8.5							205.3						12.88	21
	Wht/Red		1	14	AM	2018-06-20	2018-06-28	Cage	Live	TRUE	FALSE	8.5							192.4						12.88	21
	Wht/Red		1	14	AM	2018-06-20	2018-06-28	Cage	Live	TRUE	FALSE	8.5							198.9						12.88	21
	Wht/Red		1	14	AM	2018-06-20	2018-06-28	Cage	Live	TRUE	FALSE	8.5							215.1						12.88	21
	Wht/Red		1	14	AM	2018-06-20	2018-06-28	Cage	Live	TRUE	FALSE	8.5							177						12.88	21
	Wht/Red		1	14	AM	2018-06-20	2018-06-28	Cage	Live	TRUE	FALSE	8.5							193.2						12.88	21
	Wht/Red		1	14	AM	2018-06-20	2018-06-28	Cage	Live	TRUE	FALSE	8.5							178.2						12.88	21
	Wht/Red		1	14	AM	2018-06-20	2018-06-28	Cage	Live	TRUE	FALSE	8.5							185.6						12.88	21
	Wht/Red		1	14	AM	2018-06-20	2018-06-28	Cage	Live	TRUE	FALSE	8.5							197.3						12.88	21
	Wht/Red		1	14	AM	2018-06-20	2018-06-28	Cage	Live	TRUE	FALSE	8.5							201						12.88	21
	Wht/Red		1	14	AM	2018-06-20	2018-06-28	Cage	Live	TRUE	FALSE	8.5							171.3						12.88	21
	Wht/Red		1	14	AM	2018-06-20	2018-06-28	Cage	Live	TRUE	FALSE	8.5							173.3						12.88	21
	Wht/Red		1	14	AM	2018-06-20	2018-06-28	Cage	Live	TRUE	FALSE	8.5							187.3						12.88	21
	Wht/Red		1	14	AM	2018-06-20	2018-06-28	Cage	Live	TRUE	FALSE	8.5							190.8						12.88	21
	Wht/Red		1	14	AM	2018-06-20	2018-06-28	Cage	Live	TRUE	FALSE	8.5							207.9						12.88	21
	Wht/Red		1	14	AM	2018-06-20	2018-06-28	Cage	Live	TRUE	FALSE	8.5							187.3						12.88	21
	Wht/Red		1	14	AM	2018-06-20	2018-06-28	Cage	Live	TRUE	FALSE	8.5							203.1						12.88	21
	Wht/Red		1	14	AM	2018-06-20	2018-06-28	Cage	Live	TRUE	FALSE	8.5							186.9						12.88	21
	Wht/Red		1	14	AM	2018-06-20	2018-06-28	Cage	Live	TRUE	FALSE	8.5							182.2						12.88	21
	Wht/Red		1	14	AM	2018-06-20	2018-06-28	Cage	Live	TRUE	FALSE	8.5							175.6						12.88	21
	Wht/Red		1	14	AM	2018-06-20	2018-06-28	Cage	Live	TRUE	FALSE	8.5							176						12.88	21
	Wht/Red		1	14	AM	2018-06-20	2018-06-28	Cage	Live	TRUE	FALSE	8.5							179.9						12.88	21
	Wht/Red		1	14	AM	2018-06-20	2018-06-28	Cage	Live	TRUE	FALSE	8.5							188.4						12.88	21
	Wht/Red		1	14	AM	2018-06-20	2018-06-28	Cage	Live	TRUE	FALSE	8.5							199.2						12.88	21
	Wht/Prp		1	DLD	AM	2018-06-20	2018-06-28	Cage	Live	TRUE	FALSE	8.5							193.4						13.93	16
	Wht/Prp		1	DLD	AM	2018-06-20	2018-06-28	Cage	Live	TRUE	FALSE	8.5							210.6						13.93	16
	Wht/Prp		1	DLD	AM	2018-06-20	2018-06-28	Cage	Live	TRUE	FALSE	8.5							208						13.93	16
	Wht/Prp		1	DLD	AM	2018-06-20	2018-06-28	Cage	Live	TRUE	FALSE	8.5							217.5						13.93	16
	Wht/Prp		1	DLD	AM	2018-06-20	2018-06-28	Cage	Live	TRUE	FALSE	8.5							190.4						13.93	16
	Wht/Prp		1	DLD	AM	2018-06-20	2018-06-28	Cage	Live	TRUE	FALSE	8.5							200.6						13.93	16
	Wht/Prp		1	DLD	AM	2018-06-20	2018-06-28	Cage	Live	TRUE	FALSE	8.5							202.1						13.93	16
	Wht/Prp		1	DLD	AM	2018-06-20	2018-06-28	Cage	Live	TRUE	FALSE	8.5							181.5						13.93	16
	Wht/Prp		1	DLD	AM	2018-06-20	2018-06-28	Cage	Live	TRUE	FALSE	8.5							204.7						13.93	16
	Wht/Prp		1	DLD	AM	2018-06-20	2018-06-28	Cage	Live	TRUE	FALSE	8.5							190.1						13.93	16
	Wht/Prp		1	DLD	AM	2018-06-20	2018-06-28	Cage	Live	TRUE	FALSE	8.5							201.1						13.93	16
	Wht/Prp		1	DLD	AM	2018-06-20	2018-06-28	Cage	Live	TRUE	FALSE	8.5							215.5						13.93	16
	Wht/Prp		1	DLD	AM	2018-06-20	2018-06-28	Cage	Live	TRUE	FALSE	8.5							174.5						13.93	16
	Wht/Prp		1	DLD	AM	2018-06-20	2018-06-28	Cage	Live	TRUE	FALSE	8.5							181.6						13.93	16
	Wht/Prp		1	DLD	AM	2018-06-20	2018-06-28	Cage	Live	TRUE	FALSE	8.5							192.2						13.93	16
	Wht/Blu		1	71	AM	2018-06-20	2018-06-28	Cage	Live	TRUE	FALSE	8.5							216.3						12.98	4
	Wht/Blu		1	71	AM	2018-06-20	2018-06-28	Cage	Live	TRUE	FALSE	8.5							210.1						12.98	4
	Wht/Blu		1	71	AM	2018-06-20	2018-06-28	Cage	Live	TRUE	FALSE	8.5							227.4						12.98	4
	Wht/Blu		1	71	AM	2018-06-20	2018-06-28	Cage	Live	TRUE	FALSE	8.5							207						12.98	4
	Wht/Blu		1	71	AM	2018-06-20	2018-06-28	Cage	Live	TRUE	FALSE	8.5							231.8						12.98	4
	Wht/Blu		1	71	AM	2018-06-20	2018-06-28	Cage	Live	TRUE	FALSE	8.5							228.4						12.98	4
	Wht/Blu		1	71	AM	2018-06-20	2018-06-28	Cage	Live	TRUE	FALSE	8.5							206.2						12.98	4
	Wht/Blu		1	71	AM	2018-06-20	2018-06-28	Cage	Live	TRUE	FALSE	8.5							223.3						12.98	4
	Pnk/Red		1	14	AM	2018-06-19	2018-06-29	Cage	Live	TRUE	FALSE	10.5							185.5						12.88	21
	Pnk/Red		1	14	AM	2018-06-19	2018-06-29	Cage	Live	TRUE	FALSE	10.5							177.3						12.88	21
	Pnk/Red		1	14	AM	2018-06-19	2018-06-29	Cage	Live	TRUE	FALSE	10.5							176.6						12.88	21
	Pnk/Red		1	14	AM	2018-06-19	2018-06-29	Cage	Live	TRUE	FALSE	10.5							184.7						12.88	21
	Pnk/Red		1	14	AM	2018-06-19	2018-06-29	Cage	Live	TRUE	FALSE	10.5							181.3						12.88	21
	Pnk/Yel		1	32	AM	2018-06-19	2018-06-29	Cage	Live	TRUE	FALSE	10.5							195.2						13.27	9
	Wht/Wht		1	61	AM	2018-06-20	2018-06-29	Cage	Live	TRUE	FALSE	9.5							193.7						13.42	13
	Wht/Wht		1	61	AM	2018-06-20	2018-06-29	Cage	Live	TRUE	FALSE	9.5							200						13.42	13
	Wht/Wht		1	61	AM	2018-06-20	2018-06-29	Cage	Live	TRUE	FALSE	9.5							190.4						13.42	13
	Wht/Wht		1	61	AM	2018-06-20	2018-06-29	Cage	Live	TRUE	FALSE	9.5							193.4						13.42	13
	Wht/Wht		1	61	AM	2018-06-20	2018-06-29	Cage	Live	TRUE	FALSE	9.5							209.1						13.42	13
	Wht/Wht		1	61	AM	2018-06-20	2018-06-29	Cage	Live	TRUE	FALSE	9.5							193.6						13.42	13
	Wht/Wht		1	61	AM	2018-06-20	2018-06-29	Cage	Live	TRUE	FALSE	9.5							194						13.42	13
	Wht/Wht		1	61	AM	2018-06-20	2018-06-29	Cage	Live	TRUE	FALSE	9.5							189.9						13.42	13
	Wht/Wht		1	61	AM	2018-06-20	2018-06-29	Cage	Live	TRUE	FALSE	9.5							203						13.42	13
	Wht/Prp		1	DLD	AM	2018-06-20	2018-06-29	Cage	Live	TRUE	FALSE	9.5							190.5						13.93	16
	Wht/Prp		1	DLD	AM	2018-06-20	2018-06-29	Cage	Live	TRUE	FALSE	9.5							178.2						13.93	16
	Wht/Prp		1	DLD	AM	2018-06-20	2018-06-29	Cage	Live	TRUE	FALSE	9.5							199						13.93	16
	Wht/Prp		1	DLD	AM	2018-06-20	2018-06-29	Cage	Live	TRUE	FALSE	9.5							189.3						13.93	16
	Wht/Prp		1	DLD	AM	2018-06-20	2018-06-29	Cage	Live	TRUE	FALSE	9.5							167.3						13.93	16
	Wht/Blu		1	71	AM	2018-06-20	2018-06-29	Cage	Live	TRUE	FALSE	9.5							208						12.98	4
	Wht/Blu		1	71	AM	2018-06-20	2018-06-29	Cage	Live	TRUE	FALSE	9.5							211.3						12.98	4
	Wht/Blu		1	71	AM	2018-06-20	2018-06-29	Cage	Live	TRUE	FALSE	9.5							218.4						12.98	4
	Wht/Blu		1	71	AM	2018-06-20	2018-06-29	Cage	Live	TRUE	FALSE	9.5							199.6						12.98	4
	Wht/Blu		1	71	AM	2018-06-20	2018-06-29	Cage	Live	TRUE	FALSE	9.5							203						12.98	4
	Wht/Blu		1	71	AM	2018-06-20	2018-06-29	Cage	Live	TRUE	FALSE	9.5							196.7						12.98	4
	Wht/Blu		1	71	AM	2018-06-20	2018-06-29	Cage	Live	TRUE	FALSE	9.5							221.5						12.98	4
	Wht/Blu		1	71	AM	2018-06-20	2018-06-29	Cage	Live	TRUE	FALSE	9.5							205.5						12.98	4
	Wht/Red		1	14	AM	2018-06-20	2018-06-29	Cage	Live	TRUE	FALSE	9.5							150.1						12.88	21
	Wht/Red		1	14	AM	2018-06-20	2018-06-29	Cage	Live	TRUE	FALSE	9.5							168						12.88	21
	Wht/Grn		1	16	AM	2018-06-20	2018-06-29	Cage	Live	TRUE	FALSE	9.5							213						13.33	3
	Wht/Grn		1	16	AM	2018-06-20	2018-06-29	Cage	Live	TRUE	FALSE	9.5							223						13.33	3
	Wht/Grn		1	16	AM	2018-06-20	2018-06-29	Cage	Live	TRUE	FALSE	9.5							199.5						13.33	3
	Dkg/Wht		1	61	AM	2018-06-24	2018-06-29	Cage	Live	TRUE	FALSE	5.5							203.5						13.42	13
	Dkg/Wht		1	61	AM	2018-06-24	2018-06-29	Cage	Live	TRUE	FALSE	5.5							179.1						13.42	13
	Dkg/Wht		1	61	AM	2018-06-24	2018-06-29	Cage	Live	TRUE	FALSE	5.5							194.2						13.42	13
	Dkg/Wht		1	61	AM	2018-06-24	2018-06-29	Cage	Live	TRUE	FALSE	5.5							219.8						13.42	13
	Dkg/Wht		1	61	AM	2018-06-24	2018-06-29	Cage	Live	TRUE	FALSE	5.5							215.3						13.42	13
	Dkg/Yel		1	32	AM	2018-06-24	2018-06-29	Cage	Live	TRUE	FALSE	5.5							193						13.27	9
	Yel/Yel		1	32	AM	2018-06-23	2018-06-29	Cage	Live	TRUE	FALSE	6.5							231						13.27	9
	Yel/Yel		1	32	AM	2018-06-23	2018-06-29	Cage	Live	TRUE	FALSE	6.5							173.7						13.27	9
	Yel/Blu		1	71	AM	2018-06-23	2018-06-29	Cage	Live	TRUE	FALSE	6.5							220.1						12.98	4
	Yel/Blu		1	71	AM	2018-06-23	2018-06-29	Cage	Live	TRUE	FALSE	6.5							219.9						12.98	4
	Yel/Wht		1	61	AM	2018-06-23	2018-06-29	Cage	Live	TRUE	FALSE	6.5							180						13.42	13
	Yel/Wht		1	61	AM	2018-06-23	2018-06-29	Cage	Live	TRUE	FALSE	6.5							184						13.42	13
	Yel/Wht		1	61	AM	2018-06-23	2018-06-29	Cage	Live	TRUE	FALSE	6.5							179.5						13.42	13
	Yel/Wht		1	61	AM	2018-06-23	2018-06-29	Cage	Live	TRUE	FALSE	6.5							180.1						13.42	13
	Yel/Wht		1	61	AM	2018-06-23	2018-06-29	Cage	Live	TRUE	FALSE	6.5							186.2						13.42	13
	Yel/Wht		1	61	AM	2018-06-23	2018-06-29	Cage	Live	TRUE	FALSE	6.5							181.6						13.42	13
	Yel/Wht		1	61	AM	2018-06-23	2018-06-29	Cage	Live	TRUE	FALSE	6.5							192.5						13.42	13
	Yel/Wht		1	61	AM	2018-06-23	2018-06-29	Cage	Live	TRUE	FALSE	6.5							196.3						13.42	13
	Yel/Wht		1	61	AM	2018-06-23	2018-06-29	Cage	Live	TRUE	FALSE	6.5							169.9						13.42	13
	Yel/Wht		1	61	AM	2018-06-23	2018-06-29	Cage	Live	TRUE	FALSE	6.5							210.6						13.42	13
	Yel/Wht		1	61	AM	2018-06-23	2018-06-29	Cage	Live	TRUE	FALSE	6.5							177.7						13.42	13
	Yel/Wht		1	61	AM	2018-06-23	2018-06-29	Cage	Live	TRUE	FALSE	6.5							193.9						13.42	13
	Yel/Wht		1	61	AM	2018-06-23	2018-06-29	Cage	Live	TRUE	FALSE	6.5							189.4						13.42	13
	Yel/Wht		1	61	AM	2018-06-23	2018-06-29	Cage	Live	TRUE	FALSE	6.5							197.2						13.42	13
	Yel/Wht		1	61	AM	2018-06-23	2018-06-29	Cage	Live	TRUE	FALSE	6.5							205.8						13.42	13
	Gry/Wht		1	61	AM	2018-06-21	2018-06-29	Cage	Live	TRUE	FALSE	8.5							202.2						13.42	13
	Gry/Wht		1	61	AM	2018-06-21	2018-06-29	Cage	Live	TRUE	FALSE	8.5							209						13.42	13
	Gry/Wht		1	61	AM	2018-06-21	2018-06-29	Cage	Live	TRUE	FALSE	8.5							202.9						13.42	13
	Gry/Wht		1	61	AM	2018-06-21	2018-06-29	Cage	Live	TRUE	FALSE	8.5							198.6						13.42	13
	Gry/Wht		1	61	AM	2018-06-21	2018-06-29	Cage	Live	TRUE	FALSE	8.5							182.9						13.42	13
	Gry/Wht		1	61	AM	2018-06-21	2018-06-29	Cage	Live	TRUE	FALSE	8.5							213.4						13.42	13
	Gry/Wht		1	61	AM	2018-06-21	2018-06-29	Cage	Live	TRUE	FALSE	8.5							211.1						13.42	13
	Gry/Wht		1	61	AM	2018-06-21	2018-06-29	Cage	Live	TRUE	FALSE	8.5							202.1						13.42	13
	Gry/Wht		1	61	AM	2018-06-21	2018-06-29	Cage	Live	TRUE	FALSE	8.5							172.9						13.42	13
	Gry/Wht		1	61	AM	2018-06-21	2018-06-29	Cage	Live	TRUE	FALSE	8.5							215.4						13.42	13
	Gry/Wht		1	61	AM	2018-06-21	2018-06-29	Cage	Live	TRUE	FALSE	8.5							204						13.42	13
	Gry/Wht		1	61	AM	2018-06-21	2018-06-29	Cage	Live	TRUE	FALSE	8.5							186.8						13.42	13
	Gry/Wht		1	61	AM	2018-06-21	2018-06-29	Cage	Live	TRUE	FALSE	8.5							198						13.42	13
	Gry/Wht		1	61	AM	2018-06-21	2018-06-29	Cage	Live	TRUE	FALSE	8.5							195.3						13.42	13
	Gry/Wht		1	61	AM	2018-06-21	2018-06-29	Cage	Live	TRUE	FALSE	8.5							209.3						13.42	13
	Gry/Wht		1	61	AM	2018-06-21	2018-06-29	Cage	Live	TRUE	FALSE	8.5							213.3						13.42	13
	Gry/Wht		1	61	AM	2018-06-21	2018-06-29	Cage	Live	TRUE	FALSE	8.5							195.7						13.42	13
	Gry/Grn		1	16	AM	2018-06-21	2018-06-29	Cage	Live	TRUE	FALSE	8.5							202.7						13.33	3
	Gry/Grn		1	16	AM	2018-06-21	2018-06-29	Cage	Live	TRUE	FALSE	8.5							207.3						13.33	3
	Gry/Grn		1	16	AM	2018-06-21	2018-06-29	Cage	Live	TRUE	FALSE	8.5							226.7						13.33	3
	Gry/Grn		1	16	AM	2018-06-21	2018-06-29	Cage	Live	TRUE	FALSE	8.5							229.1						13.33	3
	Gry/Grn		1	16	AM	2018-06-21	2018-06-29	Cage	Live	TRUE	FALSE	8.5							227.7						13.33	3
	Gry/Grn		1	16	AM	2018-06-21	2018-06-29	Cage	Live	TRUE	FALSE	8.5							239.3						13.33	3
	Gry/Grn		1	16	AM	2018-06-21	2018-06-29	Cage	Live	TRUE	FALSE	8.5							214.1						13.33	3
	Gry/Blu		1	71	AM	2018-06-21	2018-06-29	Cage	Live	TRUE	FALSE	8.5							229.1						12.98	4
	Gry/Blu		1	71	AM	2018-06-21	2018-06-29	Cage	Live	TRUE	FALSE	8.5							238.9						12.98	4
	Gry/Blu		1	71	AM	2018-06-21	2018-06-29	Cage	Live	TRUE	FALSE	8.5							215.4						12.98	4
	Gry/Blu		1	71	AM	2018-06-21	2018-06-29	Cage	Live	TRUE	FALSE	8.5							217.2						12.98	4
	Gry/Red		1	14	AM	2018-06-21	2018-06-29	Cage	Live	TRUE	FALSE	8.5							194.2						12.88	21
	Gry/Red		1	14	AM	2018-06-21	2018-06-29	Cage	Live	TRUE	FALSE	8.5							201						12.88	21
	Gry/Red		1	14	AM	2018-06-21	2018-06-29	Cage	Live	TRUE	FALSE	8.5							193.7						12.88	21
	Gry/Red		1	14	AM	2018-06-21	2018-06-29	Cage	Live	TRUE	FALSE	8.5							223.3						12.88	21
	Grn/Wht		1	61	PM	2018-06-17	2018-06-29	Cage	Live	TRUE	FALSE	12							199.4						13.42	13
	Pnk/Grn		1	16	PM	2018-06-19	2018-06-29	Cage	Live	TRUE	FALSE	10							206.4						13.33	3
	Pnk/Prp		1	DLD	PM	2018-06-19	2018-06-29	Cage	Live	TRUE	FALSE	10							208.4						13.93	16
	Gry/Grn		1	16	PM	2018-06-21	2018-06-29	Cage	Live	TRUE	FALSE	8							209.6						13.33	3
	Gry/Grn		1	16	PM	2018-06-21	2018-06-29	Cage	Live	TRUE	FALSE	8							203.4						13.33	3
	Wht/Red		1	14	PM	2018-06-20	2018-06-29	Cage	Live	TRUE	FALSE	9							190.3						12.88	21
	Wht/Red		1	14	PM	2018-06-20	2018-06-29	Cage	Live	TRUE	FALSE	9							164.6						12.88	21
	Wht/Red		1	14	PM	2018-06-20	2018-06-29	Cage	Live	TRUE	FALSE	9							190.3						12.88	21
	Wht/Red		1	14	PM	2018-06-20	2018-06-29	Cage	Live	TRUE	FALSE	9							203.3						12.88	21
	Wht/Red		1	14	PM	2018-06-20	2018-06-29	Cage	Live	TRUE	FALSE	9							186.5						12.88	21
	Wht/Red		1	14	PM	2018-06-20	2018-06-29	Cage	Live	TRUE	FALSE	9							186.2						12.88	21
	Wht/Red		1	14	PM	2018-06-20	2018-06-29	Cage	Live	TRUE	FALSE	9							186.2						12.88	21
	Wht/Red		1	14	PM	2018-06-20	2018-06-29	Cage	Live	TRUE	FALSE	9							207.1						12.88	21
	Wht/Red		1	14	PM	2018-06-20	2018-06-29	Cage	Live	TRUE	FALSE	9							171.9						12.88	21
	Wht/Red		1	14	PM	2018-06-20	2018-06-29	Cage	Live	TRUE	FALSE	9							181.5						12.88	21
	Wht/Red		1	14	PM	2018-06-20	2018-06-29	Cage	Live	TRUE	FALSE	9							197						12.88	21
	Wht/Grn		1	16	PM	2018-06-20	2018-06-29	Cage	Live	TRUE	FALSE	9							201.9						13.33	3
	Wht/Grn		1	16	PM	2018-06-20	2018-06-29	Cage	Live	TRUE	FALSE	9							200.5						13.33	3
	Wht/Grn		1	16	PM	2018-06-20	2018-06-29	Cage	Live	TRUE	FALSE	9							202.1						13.33	3
	Wht/Grn		1	16	PM	2018-06-20	2018-06-29	Cage	Live	TRUE	FALSE	9							209.8						13.33	3
	Wht/Grn		1	16	PM	2018-06-20	2018-06-29	Cage	Live	TRUE	FALSE	9							208.5						13.33	3
	Wht/Wht		1	61	PM	2018-06-20	2018-06-29	Cage	Live	TRUE	FALSE	9							220.5						13.42	13
	Wht/Blu		1	71	PM	2018-06-20	2018-06-29	Cage	Live	TRUE	FALSE	9							208.1						12.98	4
	Blu/Wht		1	61	AM	2018-06-18	2018-06-30	Cage	Live	TRUE	FALSE	12.5							189						13.42	13
	Pnk/Red		1	14	AM	2018-06-19	2018-06-30	Cage	Live	TRUE	FALSE	11.5							212.3						12.88	21
	Pnk/Red		1	14	AM	2018-06-19	2018-06-30	Cage	Live	TRUE	FALSE	11.5							168						12.88	21
	Pnk/Grn		1	16	AM	2018-06-19	2018-06-30	Cage	Live	TRUE	FALSE	11.5							200.6						13.33	3
	Dkg/Yel		1	32	AM	2018-06-24	2018-06-30	Cage	Live	TRUE	FALSE	6.5							205.5						13.27	9
	Wht/Blu		1	71	AM	2018-06-20	2018-06-30	Cage	Live	TRUE	FALSE	10.5							225						12.98	4
	Wht/Blu		1	71	AM	2018-06-20	2018-06-30	Cage	Live	TRUE	FALSE	10.5							213.7						12.98	4
	Wht/Blu		1	71	AM	2018-06-20	2018-06-30	Cage	Live	TRUE	FALSE	10.5							229						12.98	4
	Wht/Blu		1	71	AM	2018-06-20	2018-06-30	Cage	Live	TRUE	FALSE	10.5							220.9						12.98	4
	Wht/Blu		1	71	AM	2018-06-20	2018-06-30	Cage	Live	TRUE	FALSE	10.5							199						12.98	4
	Wht/Blu		1	71	AM	2018-06-20	2018-06-30	Cage	Live	TRUE	FALSE	10.5							186.7						12.98	4
	Wht/Blu		1	71	AM	2018-06-20	2018-06-30	Cage	Live	TRUE	FALSE	10.5							214.2						12.98	4
	Wht/Blu		1	71	AM	2018-06-20	2018-06-30	Cage	Live	TRUE	FALSE	10.5							183.4						12.98	4
	Wht/Blu		1	71	AM	2018-06-20	2018-06-30	Cage	Live	TRUE	FALSE	10.5							206						12.98	4
	Wht/Blu		1	71	AM	2018-06-20	2018-06-30	Cage	Live	TRUE	FALSE	10.5							198.8						12.98	4
	Wht/Red		1	14	AM	2018-06-20	2018-06-30	Cage	Live	TRUE	FALSE	10.5							186.3						12.88	21
	Wht/Red		1	14	AM	2018-06-20	2018-06-30	Cage	Live	TRUE	FALSE	10.5							199.3						12.88	21
	Wht/Red		1	14	AM	2018-06-20	2018-06-30	Cage	Live	TRUE	FALSE	10.5							208.3						12.88	21
	Wht/Prp		1	DLD	AM	2018-06-20	2018-06-30	Cage	Live	TRUE	FALSE	10.5							169						13.93	16
	Wht/Prp		1	DLD	AM	2018-06-20	2018-06-30	Cage	Live	TRUE	FALSE	10.5							196.6						13.93	16
	Wht/Grn		1	16	AM	2018-06-20	2018-06-30	Cage	Live	TRUE	FALSE	10.5							211.1						13.33	3
	Wht/Wht		1	61	AM	2018-06-20	2018-06-30	Cage	Live	TRUE	FALSE	10.5							192.5						13.42	13
	Yel/Wht		1	61	AM	2018-06-23	2018-06-30	Cage	Live	TRUE	FALSE	7.5							179.1						13.42	13
	Yel/Wht		1	61	AM	2018-06-23	2018-06-30	Cage	Live	TRUE	FALSE	7.5							185.6						13.42	13
	Yel/Wht		1	61	AM	2018-06-23	2018-06-30	Cage	Live	TRUE	FALSE	7.5							185.4						13.42	13
	Yel/Wht		1	61	AM	2018-06-23	2018-06-30	Cage	Live	TRUE	FALSE	7.5							177.6						13.42	13
	Yel/Wht		1	61	AM	2018-06-23	2018-06-30	Cage	Live	TRUE	FALSE	7.5							198.3						13.42	13
	Yel/Wht		1	61	AM	2018-06-23	2018-06-30	Cage	Live	TRUE	FALSE	7.5							192.9						13.42	13
	Yel/Wht		1	61	AM	2018-06-23	2018-06-30	Cage	Live	TRUE	FALSE	7.5							178.5						13.42	13
	Yel/Wht		1	61	AM	2018-06-23	2018-06-30	Cage	Live	TRUE	FALSE	7.5							208.1						13.42	13
	Yel/Wht		1	61	AM	2018-06-23	2018-06-30	Cage	Live	TRUE	FALSE	7.5							182.8						13.42	13
	Yel/Wht		1	61	AM	2018-06-23	2018-06-30	Cage	Live	TRUE	FALSE	7.5							177.1						13.42	13
	Yel/Wht		1	61	AM	2018-06-23	2018-06-30	Cage	Live	TRUE	FALSE	7.5							159						13.42	13
	Yel/Wht		1	61	AM	2018-06-23	2018-06-30	Cage	Live	TRUE	FALSE	7.5							193.6						13.42	13
	Yel/Wht		1	61	AM	2018-06-23	2018-06-30	Cage	Live	TRUE	FALSE	7.5							184.5						13.42	13
	Yel/Wht		1	61	AM	2018-06-23	2018-06-30	Cage	Live	TRUE	FALSE	7.5							187.8						13.42	13
	Yel/Wht		1	61	AM	2018-06-23	2018-06-30	Cage	Live	TRUE	FALSE	7.5							184						13.42	13
	Yel/Wht		1	61	AM	2018-06-23	2018-06-30	Cage	Live	TRUE	FALSE	7.5							183.2						13.42	13
	Yel/Wht		1	61	AM	2018-06-23	2018-06-30	Cage	Live	TRUE	FALSE	7.5							182.3						13.42	13
	Yel/Wht		1	61	AM	2018-06-23	2018-06-30	Cage	Live	TRUE	FALSE	7.5							199.4						13.42	13
	Yel/Wht		1	61	AM	2018-06-23	2018-06-30	Cage	Live	TRUE	FALSE	7.5							184.1						13.42	13
	Yel/Blu		1	71	AM	2018-06-23	2018-06-30	Cage	Live	TRUE	FALSE	7.5							239.1						12.98	4
	Yel/Blu		1	71	AM	2018-06-23	2018-06-30	Cage	Live	TRUE	FALSE	7.5							192.3						12.98	4
	Yel/Blu		1	71	AM	2018-06-23	2018-06-30	Cage	Live	TRUE	FALSE	7.5							208.5						12.98	4
	Yel/Prp		1	DLD	AM	2018-06-23	2018-06-30	Cage	Live	TRUE	FALSE	7.5							205						13.93	16
	Yel/Prp		1	DLD	AM	2018-06-23	2018-06-30	Cage	Live	TRUE	FALSE	7.5							187.9						13.93	16
	Gry/Wht		1	61	AM	2018-06-21	2018-06-30	Cage	Live	TRUE	FALSE	9.5							193.9						13.42	13
	Gry/Wht		1	61	AM	2018-06-21	2018-06-30	Cage	Live	TRUE	FALSE	9.5							205.3						13.42	13
	Gry/Wht		1	61	AM	2018-06-21	2018-06-30	Cage	Live	TRUE	FALSE	9.5							196.7						13.42	13
	Gry/Wht		1	61	AM	2018-06-21	2018-06-30	Cage	Live	TRUE	FALSE	9.5							184						13.42	13
	Gry/Wht		1	61	AM	2018-06-21	2018-06-30	Cage	Live	TRUE	FALSE	9.5							185.9						13.42	13
	Gry/Wht		1	61	AM	2018-06-21	2018-06-30	Cage	Live	TRUE	FALSE	9.5							191.5						13.42	13
	Gry/Blu		1	71	AM	2018-06-21	2018-06-30	Cage	Live	TRUE	FALSE	9.5							199.9						12.98	4
	Gry/Blu		1	71	AM	2018-06-21	2018-06-30	Cage	Live	TRUE	FALSE	9.5							209						12.98	4
	Gry/Blu		1	71	AM	2018-06-21	2018-06-30	Cage	Live	TRUE	FALSE	9.5							182.2						12.98	4
	Gry/Blu		1	71	AM	2018-06-21	2018-06-30	Cage	Live	TRUE	FALSE	9.5							197.9						12.98	4
	Gry/Grn		1	16	AM	2018-06-21	2018-06-30	Cage	Live	TRUE	FALSE	9.5							212.6						13.33	3
	Gry/Grn		1	16	AM	2018-06-21	2018-06-30	Cage	Live	TRUE	FALSE	9.5							219.1						13.33	3
	Gry/Grn		1	16	AM	2018-06-21	2018-06-30	Cage	Live	TRUE	FALSE	9.5							217.6						13.33	3
	Gry/Grn		1	16	AM	2018-06-21	2018-06-30	Cage	Live	TRUE	FALSE	9.5							228.2						13.33	3
	Gry/Red		1	14	AM	2018-06-21	2018-06-30	Cage	Live	TRUE	FALSE	9.5							195.3						12.88	21
	Prp/Red		1	14	PM	2018-06-22	2018-06-30	Cage	Live	TRUE	FALSE	8							200.5						12.88	21
	Wht/Red		1	14	PM	2018-06-20	2018-06-30	Cage	Live	TRUE	FALSE	10							193.9						12.88	21
	Wht/Red		1	14	PM	2018-06-20	2018-06-30	Cage	Live	TRUE	FALSE	10							195.8						12.88	21
	Wht/Blu		1	71	PM	2018-06-20	2018-06-30	Cage	Live	TRUE	FALSE	10							208.7						12.98	4
	Wht/Blu		1	71	PM	2018-06-20	2018-06-30	Cage	Live	TRUE	FALSE	10							212.4						12.98	4
	Wht/Wht		1	61	PM	2018-06-20	2018-06-30	Cage	Live	TRUE	FALSE	10							174.5						13.42	13
	Wht/Prp		1	DLD	PM	2018-06-20	2018-06-30	Cage	Live	TRUE	FALSE	10							160.8						13.93	16
	Wht/Red		1	14	AM	2018-06-20	2018-07-01	Cage	Live	TRUE	FALSE	11.5							169						12.88	21
	Wht/Red		1	14	AM	2018-06-20	2018-07-01	Cage	Live	TRUE	FALSE	11.5							178.2						12.88	21
	Wht/Blu		1	71	AM	2018-06-20	2018-07-01	Cage	Live	TRUE	FALSE	11.5							189.4						12.98	4
	Wht/Blu		1	71	AM	2018-06-20	2018-07-01	Cage	Live	TRUE	FALSE	11.5							222.4						12.98	4
	Wht/Blu		1	71	AM	2018-06-20	2018-07-01	Cage	Live	TRUE	FALSE	11.5							217						12.98	4
	Wht/Blu		1	71	AM	2018-06-20	2018-07-01	Cage	Live	TRUE	FALSE	11.5							186.2						12.98	4
	Wht/Blu		1	71	AM	2018-06-20	2018-07-01	Cage	Live	TRUE	FALSE	11.5							196.7						12.98	4
	Gry/Blu		1	71	AM	2018-06-21	2018-07-01	Cage	Live	TRUE	FALSE	10.5							183.9						12.98	4
	Yel/Wht		1	61	AM	2018-06-23	2018-07-01	Cage	Live	TRUE	FALSE	8.5							174.1						13.42	13
	Yel/Wht		1	61	AM	2018-06-23	2018-07-01	Cage	Live	TRUE	FALSE	8.5							151.5						13.42	13
	Grn/Wht		1	61	AM	2018-06-17	2018-07-01	Cage	Live	TRUE	FALSE	14.5							190.4						13.42	13
	Wht/Blu		1	71	AM	2018-06-20	2018-07-02	Cage	Live	TRUE	FALSE	12.5							208.7						12.98	4
	Wht/Blu		1	71	AM	2018-06-20	2018-07-02	Cage	Live	TRUE	FALSE	12.5							198.6						12.98	4
	Yel/Prp		1	DLD	AM	2018-06-23	2018-07-02	Cage	Live	TRUE	FALSE	9.5							197						13.93	16
	Yel/Wht		1	61	AM	2018-06-23	2018-07-02	Cage	Live	TRUE	FALSE	9.5							213.2						13.42	13
	Yel/Wht		1	61	AM	2018-06-23	2018-07-02	Cage	Live	TRUE	FALSE	9.5							182.5						13.42	13
	Yel/Wht		1	61	AM	2018-06-23	2018-07-02	Cage	Live	TRUE	FALSE	9.5							182.6						13.42	13
	Yel/Blu		1	71	AM	2018-06-23	2018-07-02	Cage	Live	TRUE	FALSE	9.5							214.2						12.98	4
	Yel/Blu		1	71	AM	2018-06-23	2018-07-02	Cage	Live	TRUE	FALSE	9.5							199						12.98	4
	Gry/Prp		1	DLD	AM	2018-06-21	2018-07-02	Cage	Live	TRUE	FALSE	11.5							196.7						13.93	16
	Gry/Blu		1	71	AM	2018-06-21	2018-07-02	Cage	Live	TRUE	FALSE	11.5							205.2						12.98	4
	Gry/Blu		1	71	AM	2018-06-21	2018-07-02	Cage	Live	TRUE	FALSE	11.5							208.3						12.98	4
	Gry/Wht		1	61	AM	2018-06-21	2018-07-02	Cage	Live	TRUE	FALSE	11.5							180						13.42	13
	Gry/Wht		1	61	AM	2018-06-21	2018-07-02	Cage	Live	TRUE	FALSE	11.5							210						13.42	13
	Dkg/Wht		1	61	AM	2018-06-24	2018-07-02	Cage	Live	TRUE	FALSE	8.5							202.7						13.42	13
	Dkg/Wht		1	61	AM	2018-06-24	2018-07-02	Cage	Live	TRUE	FALSE	8.5							210.6						13.42	13
	Dkg/Wht		1	61	AM	2018-06-24	2018-07-02	Cage	Live	TRUE	FALSE	8.5							195.2						13.42	13
	Dkg/Wht		1	61	AM	2018-06-24	2018-07-02	Cage	Live	TRUE	FALSE	8.5							195.2						13.42	13
	Dkg/Wht		1	61	AM	2018-06-24	2018-07-02	Cage	Live	TRUE	FALSE	8.5							212.3						13.42	13
	Dkg/Wht		1	61	AM	2018-06-24	2018-07-02	Cage	Live	TRUE	FALSE	8.5							187.5						13.42	13
	Dkg/Wht		1	61	AM	2018-06-24	2018-07-02	Cage	Live	TRUE	FALSE	8.5							185.4						13.42	13
	Dkg/Wht		1	61	AM	2018-06-24	2018-07-02	Cage	Live	TRUE	FALSE	8.5							202.5						13.42	13
	Dkg/Wht		1	61	AM	2018-06-24	2018-07-02	Cage	Live	TRUE	FALSE	8.5							184.8						13.42	13
	Dkg/Wht		1	61	AM	2018-06-24	2018-07-02	Cage	Live	TRUE	FALSE	8.5							204.5						13.42	13
	Pnk/Red		1	14	PM	2018-06-19	2018-07-02	Cage	Live	TRUE	FALSE	13							196.7						12.88	21
	Yel/Wht		1	61	AM	2018-06-23	2018-07-03	Cage	Live	TRUE	FALSE	10.5							169.6						13.42	13
	Gry/Grn		1	16	PM	2018-06-21	2018-07-03	Cage	Live	TRUE	FALSE	12							187.7						13.33	3
	Gry/Grn		1	16	PM	2018-06-21	2018-07-03	Cage	Live	TRUE	FALSE	12							204.2						13.33	3
	Wht/Wht		1	61	PM	2018-06-20	2018-07-03	Cage	Live	TRUE	FALSE	13							184.8						13.42	13
	Wht/Wht		1	61	PM	2018-06-20	2018-07-03	Cage	Live	TRUE	FALSE	13							174.4						13.42	13
	Wht/Blu		1	71	PM	2018-06-20	2018-07-03	Cage	Live	TRUE	FALSE	13							211.8						12.98	4
	Wht/Blu		1	71	PM	2018-06-20	2018-07-03	Cage	Live	TRUE	FALSE	13							192.8						12.98	4
	Wht/Blu		1	71	PM	2018-06-20	2018-07-03	Cage	Live	TRUE	FALSE	13							186.5						12.98	4
	Wht/Red		1	14	PM	2018-06-20	2018-07-03	Cage	Live	TRUE	FALSE	13							179.2						12.88	21
	Wht/Red		1	14	PM	2018-06-20	2018-07-03	Cage	Live	TRUE	FALSE	13							191.6						12.88	21
	Wht/Prp		1	DLD	PM	2018-06-20	2018-07-03	Cage	Live	TRUE	FALSE	13							190.5						13.93	16
	Prp/Red		1	14	PM	2018-06-22	2018-07-03	Cage	Live	TRUE	FALSE	11							202.1						12.88	21
	Prp/Wht		1	61	PM	2018-06-22	2018-07-03	Cage	Live	TRUE	FALSE	11							163.8						13.42	13
	Prp/Prp		1	DLD	PM	2018-06-22	2018-07-03	Cage	Live	TRUE	FALSE	11							148.6						13.93	16
	Yel/Wht		1	61	PM	2018-06-23	2018-07-03	Cage	Live	TRUE	FALSE	10							184.6						13.42	13
	Yel/Wht		1	61	PM	2018-06-23	2018-07-03	Cage	Live	TRUE	FALSE	10							201.4						13.42	13
	Gry/Wht		1	61	AM	2018-06-21	2018-07-04	Cage	Live	TRUE	FALSE	13.5							201.7						13.42	13
	Gry/Wht		1	61	AM	2018-06-21	2018-07-04	Cage	Live	TRUE	FALSE	13.5							186.3						13.42	13
	Gry/Grn		1	16	AM	2018-06-21	2018-07-04	Cage	Live	TRUE	FALSE	13.5							201.5						13.33	3
	Grn/Wht		1	61	AM	2018-06-17	2018-07-04	Cage	Live	TRUE	FALSE	17.5							192						13.42	13
	Grn/Wht		1	61	AM	2018-06-17	2018-07-04	Cage	Live	TRUE	FALSE	17.5							205.5						13.42	13
	Grn/Wht		1	61	AM	2018-06-17	2018-07-04	Cage	Live	TRUE	FALSE	17.5							190.8						13.42	13
	Grn/Wht		1	61	AM	2018-06-17	2018-07-04	Cage	Live	TRUE	FALSE	17.5							201.6						13.42	13
	Grn/Wht		1	61	AM	2018-06-17	2018-07-04	Cage	Live	TRUE	FALSE	17.5							178.5						13.42	13
	Grn/Wht		1	61	AM	2018-06-17	2018-07-04	Cage	Live	TRUE	FALSE	17.5							195						13.42	13
	Grn/Wht		1	61	AM	2018-06-17	2018-07-04	Cage	Live	TRUE	FALSE	17.5							180.1						13.42	13
	Grn/Wht		1	61	AM	2018-06-17	2018-07-04	Cage	Live	TRUE	FALSE	17.5							186						13.42	13
	Grn/Wht		1	61	AM	2018-06-17	2018-07-04	Cage	Live	TRUE	FALSE	17.5							185.1						13.42	13
	Grn/Wht		1	61	AM	2018-06-17	2018-07-04	Cage	Live	TRUE	FALSE	17.5							202.7						13.42	13
	Grn/Wht		1	61	AM	2018-06-17	2018-07-04	Cage	Live	TRUE	FALSE	17.5							182.2						13.42	13
	Grn/Wht		1	61	AM	2018-06-17	2018-07-04	Cage	Live	TRUE	FALSE	17.5							188.1						13.42	13
	Grn/Wht		1	61	AM	2018-06-17	2018-07-04	Cage	Live	TRUE	FALSE	17.5							190						13.42	13
	Grn/Wht		1	61	AM	2018-06-17	2018-07-04	Cage	Live	TRUE	FALSE	17.5							195.8						13.42	13
	Grn/Wht		1	61	AM	2018-06-17	2018-07-04	Cage	Live	TRUE	FALSE	17.5							203.4						13.42	13
	Grn/Wht		1	61	AM	2018-06-17	2018-07-04	Cage	Live	TRUE	FALSE	17.5							197.2						13.42	13
	Yel/Wht		1	61	AM	2018-06-23	2018-07-04	Cage	Live	TRUE	FALSE	11.5							188.7						13.42	13
	Yel/Wht		1	61	AM	2018-06-23	2018-07-04	Cage	Live	TRUE	FALSE	11.5							182.1						13.42	13
	Yel/Wht		1	61	AM	2018-06-23	2018-07-04	Cage	Live	TRUE	FALSE	11.5							166.8						13.42	13
	Yel/Wht		1	61	AM	2018-06-23	2018-07-04	Cage	Live	TRUE	FALSE	11.5							188.4						13.42	13
	Yel/Wht		1	61	AM	2018-06-23	2018-07-04	Cage	Live	TRUE	FALSE	11.5							183.2						13.42	13
	Yel/Wht		1	61	AM	2018-06-23	2018-07-04	Cage	Live	TRUE	FALSE	11.5							172.9						13.42	13
	Yel/Wht		1	61	AM	2018-06-23	2018-07-04	Cage	Live	TRUE	FALSE	11.5							172.2						13.42	13
	Yel/Wht		1	61	AM	2018-06-23	2018-07-04	Cage	Live	TRUE	FALSE	11.5							185.4						13.42	13
	Yel/Wht		1	61	AM	2018-06-23	2018-07-04	Cage	Live	TRUE	FALSE	11.5							191.3						13.42	13
	Yel/Wht		1	61	AM	2018-06-23	2018-07-04	Cage	Live	TRUE	FALSE	11.5							185.7						13.42	13
	Yel/Wht		1	61	AM	2018-06-23	2018-07-04	Cage	Live	TRUE	FALSE	11.5							177.3						13.42	13
	Yel/Wht		1	61	AM	2018-06-23	2018-07-04	Cage	Live	TRUE	FALSE	11.5							155.5						13.42	13
	Yel/Wht		1	61	AM	2018-06-23	2018-07-04	Cage	Live	TRUE	FALSE	11.5							191						13.42	13
	Yel/Wht		1	61	AM	2018-06-23	2018-07-04	Cage	Live	TRUE	FALSE	11.5							182						13.42	13
	Yel/Wht		1	61	AM	2018-06-23	2018-07-04	Cage	Live	TRUE	FALSE	11.5							190.6						13.42	13
	Yel/Blu		1	71	AM	2018-06-23	2018-07-04	Cage	Live	TRUE	FALSE	11.5							203.9						12.98	4
	Gry/Wht		1	61	PM	2018-06-21	2018-07-04	Cage	Live	TRUE	FALSE	13							176.7						13.42	13
	Wht/Wht		1	61	PM	2018-06-20	2018-07-04	Cage	Live	TRUE	FALSE	14							180						13.42	13
	Wht/Wht		1	61	PM	2018-06-20	2018-07-04	Cage	Live	TRUE	FALSE	14							189.4						13.42	13
	Wht/Wht		1	61	PM	2018-06-20	2018-07-04	Cage	Live	TRUE	FALSE	14							203.8						13.42	13
	Wht/Wht		1	61	PM	2018-06-20	2018-07-04	Cage	Live	TRUE	FALSE	14							199.1						13.42	13
	Prp/Wht		1	61	PM	2018-06-22	2018-07-04	Cage	Live	TRUE	FALSE	12							192.6						13.42	13
	Prp/Wht		1	61	PM	2018-06-22	2018-07-04	Cage	Live	TRUE	FALSE	12							179.9						13.42	13
	Prp/Wht		1	61	PM	2018-06-22	2018-07-04	Cage	Live	TRUE	FALSE	12							164.1						13.42	13
	Prp/Red		1	14	PM	2018-06-22	2018-07-04	Cage	Live	TRUE	FALSE	12							206						12.88	21
	Yel/Wht		1	61	PM	2018-06-23	2018-07-04	Cage	Live	TRUE	FALSE	11							188.6						13.42	13
	Yel/Wht		1	61	PM	2018-06-23	2018-07-04	Cage	Live	TRUE	FALSE	11							186.6						13.42	13
	Yel/Wht		1	61	PM	2018-06-23	2018-07-04	Cage	Live	TRUE	FALSE	11							183.8						13.42	13
	Yel/Wht		1	61	PM	2018-06-23	2018-07-04	Cage	Live	TRUE	FALSE	11							187.6						13.42	13
	Yel/Wht		1	61	PM	2018-06-23	2018-07-04	Cage	Live	TRUE	FALSE	11							185.4						13.42	13
	Yel/Wht		1	61	PM	2018-06-23	2018-07-04	Cage	Live	TRUE	FALSE	11							185.7						13.42	13
	Yel/Wht		1	61	PM	2018-06-23	2018-07-04	Cage	Live	TRUE	FALSE	11							190.1						13.42	13
	Yel/Wht		1	61	PM	2018-06-23	2018-07-04	Cage	Live	TRUE	FALSE	11							188.5						13.42	13
	Yel/Wht		1	61	PM	2018-06-23	2018-07-04	Cage	Live	TRUE	FALSE	11							193.5						13.42	13
	Yel/Wht		1	61	PM	2018-06-23	2018-07-04	Cage	Live	TRUE	FALSE	11							193.5						13.42	13
	Yel/Wht		1	61	PM	2018-06-23	2018-07-04	Cage	Live	TRUE	FALSE	11							188.7						13.42	13
	Yel/Wht		1	61	PM	2018-06-23	2018-07-04	Cage	Live	TRUE	FALSE	11							185.1						13.42	13
	Yel/Wht		1	61	PM	2018-06-23	2018-07-04	Cage	Live	TRUE	FALSE	11							193.2						13.42	13
	Yel/Wht		1	61	PM	2018-06-23	2018-07-04	Cage	Live	TRUE	FALSE	11							189.2						13.42	13
	Yel/Wht		1	61	PM	2018-06-23	2018-07-04	Cage	Live	TRUE	FALSE	11							201.3						13.42	13
	Prp/Wht		1	61	PM	2018-06-22	2018-07-05	Cage	Live	TRUE	FALSE	13							177.6						13.42	13
	Prp/Wht		1	61	PM	2018-06-22	2018-07-05	Cage	Live	TRUE	FALSE	13							170.5						13.42	13
	Prp/Wht		1	61	PM	2018-06-22	2018-07-05	Cage	Live	TRUE	FALSE	13							169.8						13.42	13
	Prp/Wht		1	61	PM	2018-06-22	2018-07-05	Cage	Live	TRUE	FALSE	13							168.1						13.42	13
	Prp/Wht		1	61	PM	2018-06-22	2018-07-05	Cage	Live	TRUE	FALSE	13							183.4						13.42	13
	Wht/Wht		1	61	PM	2018-06-20	2018-07-05	Cage	Live	TRUE	FALSE	15							181.8						13.42	13
	Wht/Wht		1	61	PM	2018-06-20	2018-07-05	Cage	Live	TRUE	FALSE	15							198.6						13.42	13
	Wht/Red		1	14	PM	2018-06-20	2018-07-05	Cage	Live	TRUE	FALSE	15							199.1						12.88	21
	Wht/Red		1	14	PM	2018-06-20	2018-07-05	Cage	Live	TRUE	FALSE	15							191.1						12.88	21
	Yel/Wht		1	61	PM	2018-06-23	2018-07-05	Cage	Live	TRUE	FALSE	12							192.4						13.42	13
	Yel/Wht		1	61	PM	2018-06-23	2018-07-05	Cage	Live	TRUE	FALSE	12							201.6						13.42	13
	Yel/Wht		1	61	PM	2018-06-23	2018-07-05	Cage	Live	TRUE	FALSE	12							176.3						13.42	13
	Yel/Wht		1	61	PM	2018-06-23	2018-07-05	Cage	Live	TRUE	FALSE	12							194.8						13.42	13
	Yel/Wht		1	61	PM	2018-06-23	2018-07-05	Cage	Live	TRUE	FALSE	12							185.1						13.42	13
	Yel/Wht		1	61	PM	2018-06-23	2018-07-05	Cage	Live	TRUE	FALSE	12							181.8						13.42	13
	Yel/Wht		1	61	PM	2018-06-23	2018-07-05	Cage	Live	TRUE	FALSE	12							187.9						13.42	13
	Yel/Wht		1	61	PM	2018-06-23	2018-07-05	Cage	Live	TRUE	FALSE	12							197.1						13.42	13
	Yel/Wht		1	61	PM	2018-06-23	2018-07-05	Cage	Live	TRUE	FALSE	12							190.2						13.42	13
	Yel/Wht		1	61	PM	2018-06-23	2018-07-05	Cage	Live	TRUE	FALSE	12							184.4						13.42	13
	Yel/Wht		1	61	PM	2018-06-23	2018-07-05	Cage	Live	TRUE	FALSE	12							195.3						13.42	13
	Yel/Wht		1	61	AM	2018-06-23	2018-07-07	Cage	Live	TRUE	FALSE	14.5							201.5						13.42	13
	Yel/Wht		1	61	AM	2018-06-23	2018-07-07	Cage	Live	TRUE	FALSE	14.5							195.5						13.42	13
	Yel/Wht		1	61	AM	2018-06-23	2018-07-07	Cage	Live	TRUE	FALSE	14.5							189.5						13.42	13
	Yel/Wht		1	61	AM	2018-06-23	2018-07-07	Cage	Live	TRUE	FALSE	14.5							162.6						13.42	13
	Yel/Wht		1	61	AM	2018-06-23	2018-07-07	Cage	Live	TRUE	FALSE	14.5							168.3						13.42	13
	Grn/Wht		1	61	AM	2018-06-17	2018-07-07	Cage	Live	TRUE	FALSE	20.5							187.6						13.42	13
	Grn/Wht		1	61	AM	2018-06-17	2018-07-07	Cage	Live	TRUE	FALSE	20.5							192.2						13.42	13
	Prp/Wht		1	61	PM	2018-06-22	2018-07-07	Cage	Live	TRUE	FALSE	15							187.3						13.42	13
	Prp/Wht		1	61	PM	2018-06-22	2018-07-07	Cage	Live	TRUE	FALSE	15							170.5						13.42	13
	Prp/Blu		1	71	PM	2018-06-22	2018-07-07	Cage	Live	TRUE	FALSE	15							192.9						12.98	4
	Yel/Wht		1	61	PM	2018-06-23	2018-07-07	Cage	Live	TRUE	FALSE	14							196.2						13.42	13
	Yel/Wht		1	61	PM	2018-06-23	2018-07-07	Cage	Live	TRUE	FALSE	14							189.8						13.42	13
	Yel/Wht		1	61	PM	2018-06-23	2018-07-07	Cage	Live	TRUE	FALSE	14							193.6						13.42	13
	Yel/Wht		1	61	PM	2018-06-23	2018-07-07	Cage	Live	TRUE	FALSE	14							197.3						13.42	13
	Yel/Wht		1	61	PM	2018-06-23	2018-07-07	Cage	Live	TRUE	FALSE	14							180.2						13.42	13
	Yel/Wht		1	61	PM	2018-06-23	2018-07-07	Cage	Live	TRUE	FALSE	14							188.2						13.42	13
	Yel/Wht		1	61	PM	2018-06-23	2018-07-07	Cage	Live	TRUE	FALSE	14							199.7						13.42	13
	Yel/Wht		1	61	PM	2018-06-23	2018-07-07	Cage	Live	TRUE	FALSE	14							184.2						13.42	13
	Yel/Wht		1	61	PM	2018-06-23	2018-07-07	Cage	Live	TRUE	FALSE	14							189.6						13.42	13
	Yel/Wht		1	61	PM	2018-06-23	2018-07-07	Cage	Live	TRUE	FALSE	14							174.6						13.42	13
	Yel/Wht		1	61	PM	2018-06-23	2018-07-07	Cage	Live	TRUE	FALSE	14							188.4						13.42	13
	Wht/Wht		1	61	PM	2018-06-20	2018-07-07	Cage	Live	TRUE	FALSE	17							196.1						13.42	13
	Wht/Wht		1	61	PM	2018-06-20	2018-07-07	Cage	Live	TRUE	FALSE	17							194						13.42	13
	Wht/Wht		1	61	PM	2018-06-20	2018-07-07	Cage	Live	TRUE	FALSE	17							208.2						13.42	13
	Wht/Wht		1	61	PM	2018-06-20	2018-07-07	Cage	Live	TRUE	FALSE	17							203.6						13.42	13
	Wht/Wht		1	61	PM	2018-06-20	2018-07-07	Cage	Live	TRUE	FALSE	17							188.6						13.42	13
	Wht/Wht		1	61	PM	2018-06-20	2018-07-07	Cage	Live	TRUE	FALSE	17							184.7						13.42	13
	Yel/Wht		1	61	AM	2018-06-23	2018-07-08	Cage	Live	TRUE	FALSE	15.5							170.3						13.42	13
	Yel/Wht		1	61	AM	2018-06-23	2018-07-08	Cage	Live	TRUE	FALSE	15.5							230.7						13.42	13
	Yel/Wht		1	61	AM	2018-06-23	2018-07-08	Cage	Live	TRUE	FALSE	15.5							199.9						13.42	13
	Yel/Wht		1	61	AM	2018-06-23	2018-07-08	Cage	Live	TRUE	FALSE	15.5							169.5						13.42	13
	Yel/Wht		1	61	AM	2018-06-23	2018-07-08	Cage	Live	TRUE	FALSE	15.5							169.5						13.42	13
	Yel/Wht		1	61	AM	2018-06-23	2018-07-08	Cage	Live	TRUE	FALSE	15.5							167.9						13.42	13
	Dkg/Wht		1	61	AM	2018-06-24	2018-07-08	Cage	Live	TRUE	FALSE	14.5							184						13.42	13
	Dkg/Wht		1	61	AM	2018-06-24	2018-07-08	Cage	Live	TRUE	FALSE	14.5							197.9						13.42	13
	Dkg/Wht		1	61	AM	2018-06-24	2018-07-08	Cage	Live	TRUE	FALSE	14.5							200.2						13.42	13
	Dkg/Wht		1	61	AM	2018-06-24	2018-07-08	Cage	Live	TRUE	FALSE	14.5							147.5						13.42	13
	Dkg/Wht		1	61	AM	2018-06-24	2018-07-08	Cage	Live	TRUE	FALSE	14.5							195.6						13.42	13
	Yel/Wht		1	61	PM	2018-06-23	2018-07-08	Cage	Live	TRUE	FALSE	15							173.7						13.42	13
	Yel/Wht		1	61	PM	2018-06-23	2018-07-08	Cage	Live	TRUE	FALSE	15							190.5						13.42	13
	Yel/Wht		1	61	PM	2018-06-23	2018-07-08	Cage	Live	TRUE	FALSE	15							166.8						13.42	13
	Yel/Wht		1	61	PM	2018-06-23	2018-07-08	Cage	Live	TRUE	FALSE	15							189.3						13.42	13
	Yel/Wht		1	61	PM	2018-06-23	2018-07-08	Cage	Live	TRUE	FALSE	15							185						13.42	13
	Prp/Wht		1	61	PM	2018-06-22	2018-07-08	Cage	Live	TRUE	FALSE	16							164.6						13.42	13
	?/Blu		1		PM		2018-06-26	Trap	Dead	FALSE	FALSE
	?/Prp		1		PM		2018-06-29	Cage	Dead	TRUE	FALSE
	?/Red		1		AM		2018-06-21	Trap	Dead	FALSE	FALSE
	?/Red		1		PM		2018-06-27	Cage	Dead	TRUE	FALSE
	?/Red		1		PM		2018-06-30	Cage	Dead	TRUE	FALSE
	?/Wht		1		PM		2018-06-24	Trap	Dead	FALSE	FALSE
	?/Wht		1	61	PM		2018-06-25	Trap	Dead	FALSE	FALSE														13.42	13
	?/Wht		1		AM		2018-06-29	Cage	Dead	TRUE	FALSE
	?/Yel		1		AM		2018-06-20	Trap	Dead	FALSE	FALSE
	Blu/?		1		AM	2018-06-18	2018-06-26	Cage	Dead	TRUE	FALSE	8.5
	Blu/Blu		1	71	PM	2018-06-18	2018-06-24	Cage	Dead	TRUE	FALSE	6													12.98	4
	Blu/Prp		1	DLD	PM	2018-06-18	2018-06-29	Trap	Dead	FALSE	FALSE	11													13.93	16
	Blu/Red		1	14	AM	2018-06-18	2018-06-27	Cage	Dead	TRUE	FALSE	9.5													12.88	21
	Blu/Red		1	14	PM	2018-06-18	2018-06-28	Cage	Dead	TRUE	FALSE	10													12.88	21
	Blu/Wht		1	61	AM	2018-06-18	2018-06-21	Trap	Dead	FALSE	FALSE	3.5													13.42	13
	Blu/Wht		1	61	PM	2018-06-18	2018-06-21	Trap	Dead	FALSE	FALSE	3													13.42	13
	Blu/Wht		1	61	AM	2018-06-18	2018-06-22	Cage	Dead	TRUE	FALSE	4.5													13.42	13
	Blu/Wht		1	61	PM	2018-06-18	2018-06-22	Trap	Dead	FALSE	FALSE	4													13.42	13
	Blu/Wht		1	61	AM	2018-06-18	2018-06-23	Cage	Dead	TRUE	FALSE	5.5													13.42	13
	Blu/Wht		2	61	AM	2018-06-18	2018-06-24	Cage	Dead	TRUE	FALSE	6.5													13.42	13
	Blu/Wht		1	61	AM	2018-06-18	2018-06-29	Cage	Dead	TRUE	FALSE	11.5													13.42	13
	Blu/Yel		1	32	AM	2018-06-18	2018-06-20	Trap	Dead	FALSE	FALSE	2.5													13.27	9
	Blu/Yel		1	32	PM	2018-06-18	2018-06-21	Cage	Dead	TRUE	FALSE	3													13.27	9
	Blu/Yel		1	32	AM	2018-06-18	2018-06-23	Cage	Dead	TRUE	FALSE	5.5													13.27	9
	Blu/Yel		1	32	AM	2018-06-18	2018-06-25	Trap	Dead	FALSE	FALSE	7.5													13.27	9
	Blu/Yel		1	32	AM	2018-06-18	2018-06-26	Trap	Dead	FALSE	FALSE	8.5													13.27	9
	Dkg/Blu		4	71	AM	2018-06-24	2018-06-26	Trap	Dead	FALSE	FALSE	2.5													12.98	4
	Dkg/Blu		1	71	AM	2018-06-24	2018-06-27	Trap	Dead	FALSE	FALSE	3.5													12.98	4
	Dkg/Red		1	14	AM	2018-06-24	2018-06-26	Trap	Dead	FALSE	FALSE	2.5													12.88	21
	Dkg/Wht		1	61	AM	2018-06-24	2018-06-27	Trap	Dead	FALSE	FALSE	3.5													13.42	13
	Dkg/Wht		2	61	AM	2018-06-24	2018-06-30	Cage	Dead	TRUE	FALSE	6.5													13.42	13
	Dkg/Wht		3	61	AM	2018-06-24	2018-07-01	Cage	Dead	TRUE	FALSE	7.5													13.42	13
	Dkg/Wht		1	61	AM	2018-06-24	2018-07-02	Cage	Dead	TRUE	FALSE	8.5													13.42	13
	Dkg/Wht		2	61	AM	2018-06-24	2018-07-04	Cage	Dead	TRUE	FALSE	10.5													13.42	13
	Dkg/Wht		1	61	AM	2018-06-24	2018-07-07	Cage	Dead	TRUE	FALSE	13.5													13.42	13
	Dkg/Wht		1	61	AM	2018-06-24	2018-07-08	Cage	Dead	TRUE	FALSE	14.5													13.42	13
	Dkg/Wht		2	61	AM	2018-06-24	2018-07-09	Cage	Dead	TRUE	FALSE	15.5													13.42	13
	Dkg/Yel		1	32	AM	2018-06-24	2018-06-26	Trap	Dead	FALSE	FALSE	2.5													13.27	9
	Dkg/Yel		1	32	AM	2018-06-24	2018-06-28	Cage	Dead	TRUE	FALSE	4.5													13.27	9
	Dkg/Yel		2	32	AM	2018-06-24	2018-07-01	Cage	Dead	TRUE	FALSE	7.5													13.27	9
	Dkg/Yel		1	32	AM	2018-06-24	2018-07-04	Cage	Dead	TRUE	FALSE	10.5													13.27	9
	Dkg/Yel		1	32	AM	2018-06-24	2018-07-09	Cage	Dead	TRUE	FALSE	15.5													13.27	9
	Grn/Wht		2	61	AM	2018-06-17	2018-06-26	Cage	Dead	TRUE	FALSE	9.5													13.42	13
	Grn/Blu		1	71	AM	2018-06-17	2018-06-25	Cage	Dead	TRUE	FALSE	8.5													12.98	4
	Grn/Blu		8	71	AM	2018-06-17	2018-06-25	Trap	Dead	FALSE	FALSE	8.5													12.98	4
	Grn/Blu		1	71	AM	2018-06-17	2018-06-26	Cage	Dead	TRUE	FALSE	9.5													12.98	4
	Grn/Blu		1	71	AM	2018-06-17	2018-06-28	Cage	Dead	TRUE	FALSE	11.5													12.98	4
	Grn/Red		1	14	PM	2018-06-17	2018-06-21	Trap	Dead	FALSE	FALSE	4													12.88	21
	Grn/Red		1	14	AM	2018-06-17	2018-06-23	Trap	Dead	FALSE	FALSE	6.5													12.88	21
	Grn/Red		1	14	AM	2018-06-17	2018-06-25	Cage	Dead	TRUE	FALSE	8.5													12.88	21
	Grn/Wht		1	61	PM	2018-06-17	2018-06-21	Trap	Dead	FALSE	FALSE	4													13.42	13
	Grn/Wht		1	61	PM	2018-06-17	2018-06-22	Cage	Dead	TRUE	FALSE	5													13.42	13
	Grn/Wht		2	61	AM	2018-06-17	2018-06-23	Trap	Dead	FALSE	FALSE	6.5													13.42	13
	Grn/Wht		1	61	AM	2018-06-17	2018-06-23	Trap	Dead	FALSE	FALSE	6.5													13.42	13
	Grn/Wht		2	61	PM	2018-06-17	2018-06-24	Cage	Dead	TRUE	FALSE	7													13.42	13
	Grn/Wht		1	61	PM	2018-06-17	2018-06-27	Cage	Dead	TRUE	FALSE	10													13.42	13
	Grn/Wht		1	61	AM	2018-06-17	2018-06-28	Cage	Dead	TRUE	FALSE	11.5													13.42	13
	Grn/Wht		2	61	PM	2018-06-17	2018-06-28	Trap	Dead	FALSE	FALSE	11													13.42	13
	Grn/Wht		1	61	PM	2018-06-17	2018-06-29	Trap	Dead	FALSE	FALSE	12													13.42	13
	Gry/?		1		AM	2018-06-21	2018-06-25	Trap	Dead	FALSE	FALSE	4.5
	Gry/?		1		PM	2018-06-21	2018-06-26	Cage	Dead	TRUE	FALSE	5
	Gry/?		1		PM	2018-06-21	2018-06-29	Trap	Dead	FALSE	FALSE	8
	Gry/?		1		PM	2018-06-21	2018-07-02	Trap	Dead	FALSE	FALSE	11
	Gry/Blu		2	71	AM	2018-06-21	2018-06-23	Trap	Dead	FALSE	FALSE	2.5													12.98	4
	Gry/Blu		1	71	PM	2018-06-21	2018-06-23	Trap	Dead	FALSE	FALSE	2													12.98	4
	Gry/Blu		1	71	AM	2018-06-21	2018-06-24	Cage	Dead	TRUE	FALSE	3.5													12.98	4
	Gry/Blu		1	71	AM	2018-06-21	2018-06-25	Trap	Dead	FALSE	FALSE	4.5													12.98	4
	Gry/Blu		1	71	AM	2018-06-21	2018-06-26	Trap	Dead	FALSE	FALSE	5.5													12.98	4
	Gry/Blu		1	71	PM	2018-06-21	2018-06-27	Cage	Dead	TRUE	FALSE	6													12.98	4
	Gry/Blu		1	71	PM	2018-06-21	2018-06-27	Trap	Dead	FALSE	FALSE	6													12.98	4
	Gry/Blu		1	71	AM	2018-06-21	2018-06-28	Cage	Dead	TRUE	FALSE	7.5													12.98	4
	Gry/Blu		2	71	AM	2018-06-21	2018-06-29	Cage	Dead	TRUE	FALSE	8.5													12.98	4
	Gry/Blu		1	71	AM	2018-06-21	2018-07-01	Cage	Dead	TRUE	FALSE	10.5													12.98	4
	Gry/Blu		2	71	AM	2018-06-21	2018-07-02	Cage	Dead	TRUE	FALSE	11.5													12.98	4
	Gry/Blu		1	71	AM	2018-06-21	2018-07-04	Cage	Dead	TRUE	FALSE	13.5													12.98	4
	Gry/Blu		1	71	PM	2018-06-21	2018-07-05	Trap	Dead	FALSE	FALSE	14													12.98	4
	Gry/Grn		2	16	AM	2018-06-21	2018-06-22	Cage	Dead	TRUE	FALSE	1.5													13.33	3
	Gry/Grn		4	16	AM	2018-06-21	2018-06-23	Trap	Dead	FALSE	FALSE	2.5													13.33	3
	Gry/Grn		1	16	AM	2018-06-21	2018-06-24	Cage	Dead	TRUE	FALSE	3.5													13.33	3
	Gry/Grn		1	16	AM	2018-06-21	2018-06-25	Trap	Dead	FALSE	FALSE	4.5													13.33	3
	Gry/Grn		1	16	AM	2018-06-21	2018-06-26	Trap	Dead	FALSE	FALSE	5.5													13.33	3
	Gry/Grn		2	16	AM	2018-06-21	2018-06-27	Cage	Dead	TRUE	FALSE	6.5													13.33	3
	Gry/Grn		1	16	AM	2018-06-21	2018-06-27	Cage	Dead	TRUE	FALSE	6.5													13.33	3
	Gry/Grn		1	16	AM	2018-06-21	2018-06-28	Cage	Dead	TRUE	FALSE	7.5													13.33	3
	Gry/Grn		1	16	PM	2018-06-21	2018-06-28	Trap	Dead	FALSE	FALSE	7													13.33	3
	Gry/Grn		1	16	AM	2018-06-21	2018-06-29	Cage	Dead	TRUE	FALSE	8.5													13.33	3
	Gry/Grn		1	16	AM	2018-06-21	2018-06-29	Cage	Dead	TRUE	FALSE	8.5													13.33	3
	Gry/Grn		1	16	AM	2018-06-21	2018-06-30	Cage	Dead	TRUE	FALSE	9.5													13.33	3
	Gry/Grn		1	16	AM	2018-06-21	2018-07-14	Cage	Dead	TRUE	FALSE	23.5													13.33	3
	Gry/Prp		1	DLD	AM	2018-06-21	2018-06-23	Cage	Dead	TRUE	FALSE	2.5													13.93	16
	Gry/Prp		1	DLD	AM	2018-06-21	2018-06-23	Trap	Dead	FALSE	FALSE	2.5													13.93	16
	Gry/Prp		1	DLD	PM	2018-06-21	2018-06-25	Trap	Dead	FALSE	FALSE	4													13.93	16
	Gry/Prp		1	DLD	AM	2018-06-21	2018-06-28	Cage	Dead	TRUE	FALSE	7.5													13.93	16
	Gry/Prp		1	DLD	PM	2018-06-21	2018-06-29	Cage	Dead	TRUE	FALSE	8													13.93	16
	Gry/Red		3	14	AM	2018-06-21	2018-06-21	Trap	Dead	FALSE	FALSE	0.5													12.88	21
	Gry/Red		2	14	AM	2018-06-21	2018-06-23	Cage	Dead	TRUE	FALSE	2.5													12.88	21
	Gry/Red		60	14	AM	2018-06-21	2018-06-23	Trap	Dead	FALSE	FALSE	2.5													12.88	21
	Gry/Red		8	14	AM	2018-06-21	2018-06-23	Trap	Dead	FALSE	FALSE	2.5													12.88	21
	Gry/Red		1	14	AM	2018-06-21	2018-06-24	Cage	Dead	TRUE	FALSE	3.5													12.88	21
	Gry/Red		1	14	AM	2018-06-21	2018-06-25	Trap	Dead	FALSE	FALSE	4.5													12.88	21
	Gry/Red		2	14	AM	2018-06-21	2018-06-25	Trap	Dead	FALSE	FALSE	4.5													12.88	21
	Gry/Red		1	14	PM	2018-06-21	2018-06-25	Trap	Dead	FALSE	FALSE	4													12.88	21
	Gry/Red		1	14	PM	2018-06-21	2018-06-25	Trap	Dead	FALSE	FALSE	4													12.88	21
	Gry/Red		3	14	AM	2018-06-21	2018-06-26	Trap	Dead	FALSE	FALSE	5.5													12.88	21
	Gry/Red		5	14	AM	2018-06-21	2018-06-27	Cage	Dead	TRUE	FALSE	6.5													12.88	21
	Gry/Red		1	14	AM	2018-06-21	2018-06-27	Cage	Dead	TRUE	FALSE	6.5													12.88	21
	Gry/Red		2	14	AM	2018-06-21	2018-06-28	Cage	Dead	TRUE	FALSE	7.5													12.88	21
	Gry/Red		2	14	AM	2018-06-21	2018-06-28	Cage	Dead	TRUE	FALSE	7.5													12.88	21
	Gry/Red		1	14	AM	2018-06-21	2018-06-28	Trap	Dead	FALSE	FALSE	7.5													12.88	21
	Gry/Red		1	14	AM	2018-06-21	2018-06-29	Cage	Dead	TRUE	FALSE	8.5													12.88	21
	Gry/Red		1	14	AM	2018-06-21	2018-06-29	Trap	Dead	FALSE	FALSE	8.5													12.88	21
	Gry/Red		1	14	PM	2018-06-21	2018-06-29	Trap	Dead	FALSE	FALSE	8													12.88	21
	Gry/Red		2	14	AM	2018-06-21	2018-07-01	Cage	Dead	TRUE	FALSE	10.5													12.88	21
	Gry/Red		1	14	AM	2018-06-21	2018-07-04	Cage	Dead	TRUE	FALSE	13.5													12.88	21
	Gry/Wht		1	61	AM	2018-06-21	2018-06-23	Cage	Dead	TRUE	FALSE	2.5													13.42	13
	Gry/Wht		1	61	AM	2018-06-21	2018-06-23	Trap	Dead	FALSE	FALSE	2.5													13.42	13
	Gry/Wht		5	61	AM	2018-06-21	2018-06-23	Trap	Dead	FALSE	FALSE	2.5													13.42	13
	Gry/Wht		1	61	PM	2018-06-21	2018-06-24	Cage	Dead	TRUE	FALSE	3													13.42	13
	Gry/Wht		1	61	PM	2018-06-21	2018-06-24	Trap	Dead	FALSE	FALSE	3													13.42	13
	Gry/Wht		2	61	AM	2018-06-21	2018-06-25	Trap	Dead	FALSE	FALSE	4.5													13.42	13
	Gry/Wht		2	61	AM	2018-06-21	2018-06-26	Cage	Dead	TRUE	FALSE	5.5													13.42	13
	Gry/Wht		1	61	AM	2018-06-21	2018-06-26	Trap	Dead	FALSE	FALSE	5.5													13.42	13
	Gry/Wht		5	61	AM	2018-06-21	2018-06-27	Cage	Dead	TRUE	FALSE	6.5													13.42	13
	Gry/Wht		1	61	AM	2018-06-21	2018-06-27	Trap	Dead	FALSE	FALSE	6.5													13.42	13
	Gry/Wht		1	61	AM	2018-06-21	2018-06-28	Cage	Dead	TRUE	FALSE	7.5													13.42	13
	Gry/Wht		2	61	AM	2018-06-21	2018-06-28	Cage	Dead	TRUE	FALSE	7.5													13.42	13
	Gry/Wht		1	61	AM	2018-06-21	2018-06-28	Trap	Dead	FALSE	FALSE	7.5													13.42	13
	Gry/Wht		3	61	PM	2018-06-21	2018-06-28	Trap	Dead	FALSE	FALSE	7													13.42	13
	Gry/Wht		1	61	AM	2018-06-21	2018-06-29	Cage	Dead	TRUE	FALSE	8.5													13.42	13
	Gry/Wht		1	61	PM	2018-06-21	2018-06-29	Cage	Dead	TRUE	FALSE	8													13.42	13
	Gry/Wht		1	61	PM	2018-06-21	2018-06-29	Trap	Dead	FALSE	FALSE	8													13.42	13
	Gry/Wht		1	61	AM	2018-06-21	2018-06-30	Cage	Dead	TRUE	FALSE	9.5													13.42	13
	Gry/Wht		3	61	AM	2018-06-21	2018-07-01	Cage	Dead	TRUE	FALSE	10.5													13.42	13
	Gry/Wht		1	61	AM	2018-06-21	2018-07-02	Cage	Dead	TRUE	FALSE	11.5													13.42	13
	Gry/Wht		1	61	AM	2018-06-21	2018-07-02	Trap	Dead	FALSE	FALSE	11.5													13.42	13
	Gry/Wht		1	61	PM	2018-06-21	2018-07-05	Cage	Dead	TRUE	FALSE	14													13.42	13
	Gry/Yel		1	32	AM	2018-06-21	2018-06-23	Trap	Dead	FALSE	FALSE	2.5													13.27	9
	Gry/Yel		1	32	PM	2018-06-21	2018-06-24	Trap	Dead	FALSE	FALSE	3													13.27	9
	Gry/Yel		1	32	AM	2018-06-21	2018-06-25	Trap	Dead	FALSE	FALSE	4.5													13.27	9
	Gry/Yel		1	32	AM	2018-06-21	2018-06-27	Cage	Dead	TRUE	FALSE	6.5													13.27	9
	Gry/Yel		1	32	PM	2018-06-21	2018-07-02	Cage	Dead	TRUE	FALSE	11													13.27	9
	GryPrp		1	DLD	PM	2018-06-21	2018-07-08	Cage	Dead	TRUE	FALSE	17													13.93	16
	Pnk/?		1		PM	2018-06-19	2018-06-21	Trap	Dead	FALSE	FALSE	2
	Pnk/?		1		AM	2018-06-19	2018-06-23	Trap	Dead	FALSE	FALSE	4.5
	Pnk/?		1		PM	2018-06-19	2018-06-29	Trap	Dead	FALSE	FALSE	10
	Pnk/Blu		2	71	AM	2018-06-19	2018-06-23	Trap	Dead	FALSE	FALSE	4.5													12.98	4
	Pnk/Blu		1	71	AM	2018-06-19	2018-06-24	Cage	Dead	TRUE	FALSE	5.5													12.98	4
	Pnk/Blu		1	71	PM	2018-06-19	2018-06-24	Cage	Dead	TRUE	FALSE	5													12.98	4
	Pnk/Blu		1	71	AM	2018-06-19	2018-06-26	Cage	Dead	TRUE	FALSE	7.5													12.98	4
	Pnk/Blu		1	71	AM	2018-06-19	2018-06-26	Cage	Dead	TRUE	FALSE	7.5													12.98	4
	Pnk/Blu		4	71	AM	2018-06-19	2018-06-27	Cage	Dead	TRUE	FALSE	8.5													12.98	4
	Pnk/Blu		1	71	PM	2018-06-19	2018-07-02	Cage	Dead	TRUE	FALSE	13													12.98	4
	Pnk/Grn		2	16	AM	2018-06-19	2018-06-23	Trap	Dead	FALSE	FALSE	4.5													13.33	3
	Pnk/Grn		1	16	AM	2018-06-19	2018-06-29	Cage	Dead	TRUE	FALSE	10.5													13.33	3
	Pnk/Grn		1	16	AM	2018-06-19	2018-07-03	Cage	Dead	TRUE	FALSE	14.5													13.33	3
	Pnk/Prp		3	DLD	AM	2018-06-19	2018-06-23	Trap	Dead	FALSE	FALSE	4.5													13.93	16
	Pnk/Prp		1	DLD	PM	2018-06-19	2018-06-24	Trap	Dead	FALSE	FALSE	5													13.93	16
	Pnk/Prp		1	DLD	AM	2018-06-19	2018-06-27	Cage	Dead	TRUE	FALSE	8.5													13.93	16
	Pnk/Prp		1	DLD	PM	2018-06-19	2018-06-27	Cage	Dead	TRUE	FALSE	8													13.93	16
	Pnk/Prp		1	DLD	PM	2018-06-19	2018-06-28	Cage	Dead	TRUE	FALSE	9													13.93	16
	Pnk/Prp		1	DLD	PM	2018-06-19	2018-06-29	Cage	Dead	TRUE	FALSE	10													13.93	16
	Pnk/Prp		1	DLD	PM	2018-06-19	2018-06-29	Cage	Dead	TRUE	FALSE	10													13.93	16
	Pnk/Prp		1	DLD	PM	2018-06-19	2018-06-29	Trap	Dead	FALSE	FALSE	10													13.93	16
	Pnk/Prp		1	DLD	PM	2018-06-19	2018-07-26	Cage	Dead	TRUE	FALSE	37													13.93	16
	Pnk/Red		2	14	AM	2018-06-19	2018-06-20	Trap	Dead	FALSE	FALSE	1.5													12.88	21
	Pnk/Red		3	14	AM	2018-06-19	2018-06-21	Trap	Dead	FALSE	FALSE	2.5													12.88	21
	Pnk/Red		2	14	PM	2018-06-19	2018-06-21	Trap	Dead	FALSE	FALSE	2													12.88	21
	Pnk/Red		2	14	AM	2018-06-19	2018-06-22	Cage	Dead	TRUE	FALSE	3.5													12.88	21
	Pnk/Red		1	14	PM	2018-06-19	2018-06-22	Cage	Dead	TRUE	FALSE	3													12.88	21
	Pnk/Red		1	14	PM	2018-06-19	2018-06-22	Trap	Dead	FALSE	FALSE	3													12.88	21
	Pnk/Red		4	14	AM	2018-06-19	2018-06-23	Cage	Dead	TRUE	FALSE	4.5													12.88	21
	Pnk/Red		2	14	AM	2018-06-19	2018-06-23	Cage	Dead	TRUE	FALSE	4.5													12.88	21
	Pnk/Red		2	14	AM	2018-06-19	2018-06-23	Trap	Dead	FALSE	FALSE	4.5													12.88	21
	Pnk/Red		3	14	AM	2018-06-19	2018-06-23	Trap	Dead	FALSE	FALSE	4.5													12.88	21
	Pnk/Red		7	14	AM	2018-06-19	2018-06-23	Trap	Dead	FALSE	FALSE	4.5													12.88	21
	Pnk/Red		1	14	PM	2018-06-19	2018-06-23	Cage	Dead	TRUE	FALSE	4													12.88	21
	Pnk/Red		1	14	AM	2018-06-19	2018-06-24	Cage	Dead	TRUE	FALSE	5.5													12.88	21
	Pnk/Red		5	14	PM	2018-06-19	2018-06-24	Cage	Dead	TRUE	FALSE	5													12.88	21
	Pnk/Red		3	14	PM	2018-06-19	2018-06-24	Trap	Dead	FALSE	FALSE	5													12.88	21
	Pnk/Red		2	14	PM	2018-06-19	2018-06-25	Trap	Dead	FALSE	FALSE	6													12.88	21
	Pnk/Red		1	14	PM	2018-06-19	2018-06-25	Trap	Dead	FALSE	FALSE	6													12.88	21
	Pnk/Red		1	14	AM	2018-06-19	2018-06-26	Cage	Dead	TRUE	FALSE	7.5													12.88	21
	Pnk/Red		2	14	AM	2018-06-19	2018-06-26	Trap	Dead	FALSE	FALSE	7.5													12.88	21
	Pnk/Red		2	14	PM	2018-06-19	2018-06-26	Trap	Dead	FALSE	FALSE	7													12.88	21
	Pnk/Red		17	14	AM	2018-06-19	2018-06-27	Cage	Dead	TRUE	FALSE	8.5													12.88	21
	Pnk/Red		8	14	PM	2018-06-19	2018-06-27	Cage	Dead	TRUE	FALSE	8													12.88	21
	Pnk/Red		2	14	AM	2018-06-19	2018-06-28	Cage	Dead	TRUE	FALSE	9.5													12.88	21
	Pnk/Red		4	14	AM	2018-06-19	2018-06-28	Cage	Dead	TRUE	FALSE	9.5													12.88	21
	Pnk/Red		2	14	AM	2018-06-19	2018-06-28	Trap	Dead	FALSE	FALSE	9.5													12.88	21
	Pnk/Red		1	14	PM	2018-06-19	2018-06-28	Cage	Dead	TRUE	FALSE	9													12.88	21
	Pnk/Red		2	14	AM	2018-06-19	2018-06-29	Cage	Dead	TRUE	FALSE	10.5													12.88	21
	Pnk/Red		3	14	PM	2018-06-19	2018-06-29	Cage	Dead	TRUE	FALSE	10													12.88	21
	Pnk/Red		2	14	PM	2018-06-19	2018-06-29	Cage	Dead	TRUE	FALSE	10													12.88	21
	Pnk/Red		1	14	AM	2018-06-19	2018-06-30	Cage	Dead	TRUE	FALSE	11.5													12.88	21
	Pnk/Red		1	14	PM	2018-06-19	2018-06-30	Trap	Dead	FALSE	FALSE	11													12.88	21
	Pnk/Red		1	14	AM	2018-06-19	2018-07-01	Cage	Dead	TRUE	FALSE	12.5													12.88	21
	Pnk/Red		1	14	PM	2018-06-19	2018-07-01	Cage	Dead	TRUE	FALSE	12													12.88	21
	Pnk/Red		1	14	PM	2018-06-19	2018-07-02	Cage	Dead	TRUE	FALSE	13													12.88	21
	Pnk/Red		1	14	PM	2018-06-19	2018-07-02	Cage	Dead	TRUE	FALSE	13													12.88	21
	Pnk/Red		1	14	PM	2018-06-19	2018-07-03	Cage	Dead	TRUE	FALSE	14													12.88	21
	Pnk/Wht		1	61	AM	2018-06-19	2018-07-02	Cage	Dead	TRUE	FALSE	13.5													13.42	13
	Pnk/Yel		1	32	AM	2018-06-19	2018-06-21	Trap	Dead	FALSE	FALSE	2.5													13.27	9
	Pnk/Yel		1	32	AM	2018-06-19	2018-06-23	Cage	Dead	TRUE	FALSE	4.5													13.27	9
	Pnk/Yel		1	32	AM	2018-06-19	2018-06-23	Trap	Dead	FALSE	FALSE	4.5													13.27	9
	Pnk/Yel		1	32	PM	2018-06-19	2018-06-25	Trap	Dead	FALSE	FALSE	6													13.27	9
	Pnk/Yel		1	32	PM	2018-06-19	2018-06-26	Trap	Dead	FALSE	FALSE	7													13.27	9
	Pnk/Yel		1	32	PM	2018-06-19	2018-06-27	Cage	Dead	TRUE	FALSE	8													13.27	9
	Pnk/Yel		1	32	AM	2018-06-19	2018-07-02	Cage	Dead	TRUE	FALSE	13.5													13.27	9
	Prp/?		1		PM	2018-06-22	2018-06-29	Cage	Dead	TRUE	FALSE	7
	Prp/?		1		PM	2018-06-22	2018-07-10	Trap	Dead	FALSE	FALSE	18
	Prp/Blu		1	71	PM	2018-06-22	2018-06-24	Trap	Dead	FALSE	FALSE	2													12.98	4
	Prp/Blu		2	71	PM	2018-06-22	2018-07-01	Cage	Dead	TRUE	FALSE	9													12.98	4
	Prp/Grn		1	16	PM	2018-06-22	2018-06-25	Trap	Dead	FALSE	FALSE	3													13.33	3
	Prp/Grn		1	16	PM	2018-06-22	2018-06-26	Trap	Dead	FALSE	FALSE	4													13.33	3
	Prp/Prp		1	DLD	PM	2018-06-22	2018-07-03	Cage	Dead	TRUE	FALSE	11													13.93	16
	Prp/Red		1	14	PM	2018-06-22	2018-06-24	Trap	Dead	FALSE	FALSE	2													12.88	21
	Prp/Red		1	14	PM	2018-06-22	2018-06-25	Trap	Dead	FALSE	FALSE	3													12.88	21
	Prp/Red		2	14	PM	2018-06-22	2018-06-26	Trap	Dead	FALSE	FALSE	4													12.88	21
	Prp/Red		1	14	PM	2018-06-22	2018-06-27	Cage	Dead	TRUE	FALSE	5													12.88	21
	Prp/Red		1	14	PM	2018-06-22	2018-06-27	Cage	Dead	TRUE	FALSE	5													12.88	21
	Prp/Red		1	14	PM	2018-06-22	2018-06-29	Cage	Dead	TRUE	FALSE	7													12.88	21
	Prp/Red		1	14	PM	2018-06-22	2018-07-11	Cage	Dead	TRUE	FALSE	19													12.88	21
	Prp/Wht		1	61	PM	2018-06-22	2018-06-23	Cage	Dead	TRUE	FALSE	1													13.42	13
	Prp/Wht		1	61	PM	2018-06-22	2018-06-24	Cage	Dead	TRUE	FALSE	2													13.42	13
	Prp/Wht		4	61	PM	2018-06-22	2018-06-24	Trap	Dead	FALSE	FALSE	2													13.42	13
	Prp/Wht		1	61	PM	2018-06-22	2018-06-27	Cage	Dead	TRUE	FALSE	5													13.42	13
	Prp/Wht		1	61	AM	2018-06-22	2018-06-28	Trap	Dead	FALSE	FALSE	6.5													13.42	13
	Prp/Wht		1	61	PM	2018-06-22	2018-06-29	Cage	Dead	TRUE	FALSE	7													13.42	13
	Prp/Wht		1	61	PM	2018-06-22	2018-06-29	Cage	Dead	TRUE	FALSE	7													13.42	13
	Prp/Wht		1	61	PM	2018-06-22	2018-07-07	Cage	Dead	TRUE	FALSE	15													13.42	13
	Prp/Wht		1	61	PM	2018-06-22	2018-07-08	Cage	Dead	TRUE	FALSE	16													13.42	13
	Prp/Wht		1	61	PM	2018-06-22	2018-07-22	Cage	Dead	TRUE	FALSE	30													13.42	13
	Wht/?		1		PM	2018-06-20	2018-06-25	Trap	Dead	FALSE	FALSE	5
	Wht/?		1		AM	2018-06-20	2018-06-28	Cage	Dead	TRUE	FALSE	8.5
	Wht/?		2		AM	2018-06-20	2018-06-28	Trap	Dead	FALSE	FALSE	8.5
	Wht/?		1		PM	2018-06-20	2018-06-29	Cage	Dead	TRUE	FALSE	9
	Wht/?		1		PM	2018-06-20	2018-06-29	Cage	Dead	TRUE	FALSE	9
	Wht/?		1		PM	2018-06-20	2018-07-03	Cage	Dead	TRUE	FALSE	13
	Wht/?		1		AM	2018-06-20	2018-07-14	Cage	Dead	TRUE	FALSE	24.5
	Wht/Blu		1	71	AM	2018-06-20	2018-06-21	Trap	Dead	FALSE	FALSE	1.5													12.98	4
	Wht/Blu		2	71	PM	2018-06-20	2018-06-21	Trap	Dead	FALSE	FALSE	1													12.98	4
	Wht/Blu		2	71	AM	2018-06-20	2018-06-23	Cage	Dead	TRUE	FALSE	3.5													12.98	4
	Wht/Blu		6	71	AM	2018-06-20	2018-06-23	Trap	Dead	FALSE	FALSE	3.5													12.98	4
	Wht/Blu		1	71	PM	2018-06-20	2018-06-25	Trap	Dead	FALSE	FALSE	5													12.98	4
	Wht/Blu		4	71	AM	2018-06-20	2018-06-27	Cage	Dead	TRUE	FALSE	7.5													12.98	4
	Wht/Blu		1	71	AM	2018-06-20	2018-06-29	Cage	Dead	TRUE	FALSE	9.5													12.98	4
	Wht/Blu		1	71	AM	2018-06-20	2018-07-01	Cage	Dead	TRUE	FALSE	11.5													12.98	4
	Wht/Blu		2	71	AM	2018-06-20	2018-07-02	Cage	Dead	TRUE	FALSE	12.5													12.98	4
	Wht/Blu		1	71	PM	2018-06-20	2018-07-02	Cage	Dead	TRUE	FALSE	12													12.98	4
	Wht/Blu		1	71	PM	2018-06-20	2018-07-03	Cage	Dead	TRUE	FALSE	13													12.98	4
	Wht/Blu		1	71	AM	2018-06-20	2018-07-14	Cage	Dead	TRUE	FALSE	24.5													12.98	4
	Wht/Grn		1	16	AM	2018-06-20	2018-06-21	Trap	Dead	FALSE	FALSE	1.5													13.33	3
	Wht/Grn		1	16	PM	2018-06-20	2018-06-22	Cage	Dead	TRUE	FALSE	2													13.33	3
	Wht/Grn		3	16	AM	2018-06-20	2018-06-23	Cage	Dead	TRUE	FALSE	3.5													13.33	3
	Wht/Grn		2	16	AM	2018-06-20	2018-06-23	Trap	Dead	FALSE	FALSE	3.5													13.33	3
	Wht/Grn		2	16	PM	2018-06-20	2018-06-23	Cage	Dead	TRUE	FALSE	3													13.33	3
	Wht/Grn		1	16	AM	2018-06-20	2018-06-24	Cage	Dead	TRUE	FALSE	4.5													13.33	3
	Wht/Grn		1	16	AM	2018-06-20	2018-06-25	Trap	Dead	FALSE	FALSE	5.5													13.33	3
	Wht/Grn		1	16	AM	2018-06-20	2018-06-25	Trap	Dead	FALSE	FALSE	5.5													13.33	3
	Wht/Grn		3	16	PM	2018-06-20	2018-06-25	Trap	Dead	FALSE	FALSE	5													13.33	3
	Wht/Grn		1	16	AM	2018-06-20	2018-06-26	Trap	Dead	FALSE	FALSE	6.5													13.33	3
	Wht/Grn		4	16	AM	2018-06-20	2018-06-27	Cage	Dead	TRUE	FALSE	7.5													13.33	3
	Wht/Grn		1	16	AM	2018-06-20	2018-06-28	Cage	Dead	TRUE	FALSE	8.5													13.33	3
	Wht/Grn		1	16	AM	2018-06-20	2018-06-29	Trap	Dead	FALSE	FALSE	9.5													13.33	3
	Wht/Grn		1	16	AM	2018-06-20	2018-07-01	Cage	Dead	TRUE	FALSE	11.5													13.33	3
	Wht/Grn		1	16	PM	2018-06-20	2018-07-01	Cage	Dead	TRUE	FALSE	11													13.33	3
	Wht/Grn		1	16	PM	2018-06-20	2018-07-03	Cage	Dead	TRUE	FALSE	13													13.33	3
	Wht/Grn		1	16	PM	2018-06-20	2018-07-09	Cage	Dead	TRUE	FALSE	19													13.33	3
	Wht/Prp		2	DLD	AM	2018-06-20	2018-06-22	Cage	Dead	TRUE	FALSE	2.5													13.93	16
	Wht/Prp		2	DLD	AM	2018-06-20	2018-06-23	Trap	Dead	FALSE	FALSE	3.5													13.93	16
	Wht/Prp		1	DLD	PM	2018-06-20	2018-06-25	Trap	Dead	FALSE	FALSE	5													13.93	16
	Wht/Prp		1	DLD	PM	2018-06-20	2018-06-26	Trap	Dead	FALSE	FALSE	6													13.93	16
	Wht/Prp		1	DLD	PM	2018-06-20	2018-06-27	Cage	Dead	TRUE	FALSE	7													13.93	16
	Wht/Prp		1	DLD	AM	2018-06-20	2018-06-28	Trap	Dead	FALSE	FALSE	8.5													13.93	16
	Wht/Prp		2	DLD	PM	2018-06-20	2018-06-29	Cage	Dead	TRUE	FALSE	9													13.93	16
	Wht/Prp		1	DLD	AM	2018-06-20	2018-06-30	Cage	Dead	TRUE	FALSE	10.5													13.93	16
	Wht/Prp		1	DLD	PM	2018-06-20	2018-06-30	Trap	Dead	FALSE	FALSE	10													13.93	16
	Wht/Prp		1	DLD	PM	2018-06-20	2018-07-03	Cage	Dead	TRUE	FALSE	13													13.93	16
	Wht/Red		14	14	AM	2018-06-20	2018-06-20	Trap	Dead	FALSE	FALSE	0.5													12.88	21
	Wht/Red		2	14	AM	2018-06-20	2018-06-21	Trap	Dead	FALSE	FALSE	1.5													12.88	21
	Wht/Red		21	14	AM	2018-06-20	2018-06-21	Trap	Dead	FALSE	FALSE	1.5													12.88	21
	Wht/Red		20	14	PM	2018-06-20	2018-06-21	Trap	Dead	FALSE	FALSE	1													12.88	21
	Wht/Red		8	14	AM	2018-06-20	2018-06-23	Cage	Dead	TRUE	FALSE	3.5													12.88	21
	Wht/Red		4	14	AM	2018-06-20	2018-06-23	Cage	Dead	TRUE	FALSE	3.5													12.88	21
	Wht/Red		20	14	AM	2018-06-20	2018-06-23	Trap	Dead	FALSE	FALSE	3.5													12.88	21
	Wht/Red		52	14	AM	2018-06-20	2018-06-23	Trap	Dead	FALSE	FALSE	3.5													12.88	21
	Wht/Red		3	14	PM	2018-06-20	2018-06-23	Cage	Dead	TRUE	FALSE	3													12.88	21
	Wht/Red		2	14	PM	2018-06-20	2018-06-23	Trap	Dead	FALSE	FALSE	3													12.88	21
	Wht/red		1	14	AM	2018-06-20	2018-06-24	Cage	Dead	TRUE	FALSE	4.5													12.88	21
	Wht/Red		1	14	AM	2018-06-20	2018-06-24	Trap	Dead	FALSE	FALSE	4.5													12.88	21
	Wht/Red		7	14	PM	2018-06-20	2018-06-24	Cage	Dead	TRUE	FALSE	4													12.88	21
	Wht/Red		4	14	PM	2018-06-20	2018-06-24	Trap	Dead	FALSE	FALSE	4													12.88	21
	Wht/Red		5	14	AM	2018-06-20	2018-06-25	Cage	Dead	TRUE	FALSE	5.5													12.88	21
	Wht/Red		5	14	AM	2018-06-20	2018-06-25	Trap	Dead	FALSE	FALSE	5.5													12.88	21
	Wht/Red		1	14	PM	2018-06-20	2018-06-25	Cage	Dead	TRUE	FALSE	5													12.88	21
	Wht/Red		5	14	PM	2018-06-20	2018-06-25	Trap	Dead	FALSE	FALSE	5													12.88	21
	Wht/Red		1	14	PM	2018-06-20	2018-06-25	Trap	Dead	FALSE	FALSE	5													12.88	21
	Wht/Red		1	14	AM	2018-06-20	2018-06-26	Cage	Dead	TRUE	FALSE	6.5													12.88	21
	Wht/Red		2	14	AM	2018-06-20	2018-06-26	Trap	Dead	FALSE	FALSE	6.5													12.88	21
	Wht/Red		1	14	PM	2018-06-20	2018-06-26	Cage	Dead	TRUE	FALSE	6													12.88	21
	Wht/Red		2	14	PM	2018-06-20	2018-06-26	Trap	Dead	FALSE	FALSE	6													12.88	21
	Wht/Red		17	14	AM	2018-06-20	2018-06-27	Cage	Dead	TRUE	FALSE	7.5													12.88	21
	Wht/Red		3	14	AM	2018-06-20	2018-06-27	Trap	Dead	FALSE	FALSE	7.5													12.88	21
	Wht/Red		4	14	PM	2018-06-20	2018-06-27	Cage	Dead	TRUE	FALSE	7													12.88	21
	Wht/Red		2	14	PM	2018-06-20	2018-06-27	Trap	Dead	FALSE	FALSE	7													12.88	21
	Wht/Red		3	14	AM	2018-06-20	2018-06-28	Cage	Dead	TRUE	FALSE	8.5													12.88	21
	Wht/Red		4	14	AM	2018-06-20	2018-06-28	Trap	Dead	FALSE	FALSE	8.5													12.88	21
	Wht/Red		3	14	PM	2018-06-20	2018-06-28	Cage	Dead	TRUE	FALSE	8													12.88	21
	Wht/Red		1	14	PM	2018-06-20	2018-06-28	Cage	Dead	TRUE	FALSE	8													12.88	21
	Wht/Red		2	14	PM	2018-06-20	2018-06-28	Trap	Dead	FALSE	FALSE	8													12.88	21
	Wht/Red		1	14	AM	2018-06-20	2018-06-29	Cage	Dead	TRUE	FALSE	9.5													12.88	21
	Wht/Red		1	14	AM	2018-06-20	2018-06-29	Trap	Dead	FALSE	FALSE	9.5													12.88	21
	Wht/Red		3	14	PM	2018-06-20	2018-06-29	Cage	Dead	TRUE	FALSE	9													12.88	21
	Wht/Red		2	14	PM	2018-06-20	2018-06-29	Trap	Dead	FALSE	FALSE	9													12.88	21
	Wht/Red		1	14	AM	2018-06-20	2018-06-30	Cage	Dead	TRUE	FALSE	10.5													12.88	21
	Wht/Red		1	14	AM	2018-06-20	2018-06-30	Trap	Dead	FALSE	FALSE	10.5													12.88	21
	Wht/Red		3	14	AM	2018-06-20	2018-07-01	Cage	Dead	TRUE	FALSE	11.5													12.88	21
	Wht/Red		3	14	PM	2018-06-20	2018-07-01	Cage	Dead	TRUE	FALSE	11													12.88	21
	Wht/Red		1	14	AM	2018-06-20	2018-07-02	Cage	Dead	TRUE	FALSE	12.5													12.88	21
	Wht/Red		1	14	AM	2018-06-20	2018-07-03	Cage	Dead	TRUE	FALSE	13.5													12.88	21
	Wht/Red		1	14	AM	2018-06-20	2018-07-05	Cage	Dead	TRUE	FALSE	15.5													12.88	21
	Wht/Red		1	14	PM	2018-06-20	2018-07-08	Cage	Dead	TRUE	FALSE	18													12.88	21
	Wht/Wht		5	61	AM	2018-06-20	2018-06-21	Trap	Dead	FALSE	FALSE	1.5													13.42	13
	Wht/Wht		2	61	PM	2018-06-20	2018-06-21	Trap	Dead	FALSE	FALSE	1													13.42	13
	Wht/Wht		1	61	AM	2018-06-20	2018-06-23	Cage	Dead	TRUE	FALSE	3.5													13.42	13
	Wht/Wht		1	61	AM	2018-06-20	2018-06-23	Trap	Dead	FALSE	FALSE	3.5													13.42	13
	Wht/Wht		2	61	AM	2018-06-20	2018-06-23	Trap	Dead	FALSE	FALSE	3.5													13.42	13
	Wht/Wht		1	61	AM	2018-06-20	2018-06-26	Trap	Dead	FALSE	FALSE	6.5													13.42	13
	Wht/Wht		2	61	PM	2018-06-20	2018-06-27	Cage	Dead	TRUE	FALSE	7													13.42	13
	Wht/Wht		1	61	AM	2018-06-20	2018-06-29	Cage	Dead	TRUE	FALSE	9.5													13.42	13
	Wht/Wht		2	61	PM	2018-06-20	2018-06-29	Cage	Dead	TRUE	FALSE	9													13.42	13
	Wht/Wht		1	61	AM	2018-06-20	2018-06-30	Cage	Dead	TRUE	FALSE	10.5													13.42	13
	Wht/Wht		1	61	AM	2018-06-20	2018-06-30	Trap	Dead	FALSE	FALSE	10.5													13.42	13
	Wht/Wht		1	61	PM	2018-06-20	2018-06-30	Cage	Dead	TRUE	FALSE	10													13.42	13
	Wht/Wht		2	61	AM	2018-06-20	2018-07-01	Cage	Dead	TRUE	FALSE	11.5													13.42	13
	Wht/Wht		2	61	AM	2018-06-20	2018-07-02	Cage	Dead	TRUE	FALSE	12.5													13.42	13
	Wht/Wht		2	61	AM	2018-06-20	2018-07-03	Cage	Dead	TRUE	FALSE	13.5													13.42	13
	Wht/Wht		1	61	PM	2018-06-20	2018-07-03	Cage	Dead	TRUE	FALSE	13													13.42	13
	Wht/Yel		1	32	AM	2018-06-20	2018-06-23	Cage	Dead	TRUE	FALSE	3.5													13.27	9
	Wht/Yel		2	32	AM	2018-06-20	2018-06-23	Trap	Dead	FALSE	FALSE	3.5													13.27	9
	Wht/Yel		1	32	PM	2018-06-20	2018-06-27	Cage	Dead	TRUE	FALSE	7													13.27	9
	Wht/Yel		1	32	AM	2018-06-20	2018-06-28	Cage	Dead	TRUE	FALSE	8.5													13.27	9
	Wht/Yel		1	32	PM	2018-06-20	2018-06-28	Cage	Dead	TRUE	FALSE	8													13.27	9
	Wht/Yel		1	32	PM	2018-06-20	2018-06-29	Cage	Dead	TRUE	FALSE	9													13.27	9
	Wht/Yel		1	32	AM	2018-06-20	2018-07-01	Cage	Dead	TRUE	FALSE	11.5													13.27	9
	Ye/Wht		1	61	AM	2018-06-22	2018-06-24	Trap	Dead	FALSE	FALSE	2.5													13.42	13
	Yel/?		1		AM	2018-06-23	2018-06-25	Trap	Dead	FALSE	FALSE	2.5
	Yel/?		1		AM	2018-06-23	2018-06-26	Trap	Dead	FALSE	FALSE	3.5
	Yel/?		1		PM	2018-06-23	2018-06-27	Trap	Dead	FALSE	FALSE	4
	Yel/Blu		1	71	PM	2018-06-23	2018-06-25	Trap	Dead	FALSE	FALSE	2													12.98	4
	Yel/Blu		2	71	AM	2018-06-23	2018-06-26	Cage	Dead	TRUE	FALSE	3.5													12.98	4
	Yel/Blu		2	71	AM	2018-06-23	2018-06-27	Trap	Dead	FALSE	FALSE	4.5													12.98	4
	Yel/Blu		1	71	AM	2018-06-23	2018-06-28	Cage	Dead	TRUE	FALSE	5.5													12.98	4
	Yel/Blu		1	71	AM	2018-06-23	2018-06-30	Cage	Dead	TRUE	FALSE	7.5													12.98	4
	Yel/Blu		2	71	AM	2018-06-23	2018-07-01	Cage	Dead	TRUE	FALSE	8.5													12.98	4
	Yel/Blu		1	71	AM	2018-06-23	2018-07-05	Cage	Dead	TRUE	FALSE	12.5													12.98	4
	Yel/Grn		1	16	PM	2018-06-23	2018-06-25	Cage	Dead	TRUE	FALSE	2													13.33	3
	Yel/Grn		2	16	PM	2018-06-23	2018-06-25	Trap	Dead	FALSE	FALSE	2													13.33	3
	Yel/Grn		1	16	AM	2018-06-23	2018-06-29	Cage	Dead	TRUE	FALSE	6.5													13.33	3
	Yel/Prp		1	DLD	AM	2018-06-23	2018-06-26	Trap	Dead	FALSE	FALSE	3.5													13.93	16
	Yel/Prp		1	DLD	PM	2018-06-23	2018-06-26	Cage	Dead	TRUE	FALSE	3													13.93	16
	Yel/Prp		1	DLD	PM	2018-06-23	2018-06-29	Cage	Dead	TRUE	FALSE	6													13.93	16
	Yel/Red		1	14	AM	2018-06-23	2018-06-24	Cage	Dead	TRUE	FALSE	1.5													12.88	21
	Yel/Red		3	14	AM	2018-06-23	2018-06-24	Trap	Dead	FALSE	FALSE	1.5													12.88	21
	Yel/Red		1	14	AM	2018-06-23	2018-06-25	Trap	Dead	FALSE	FALSE	2.5													12.88	21
	Yel/Red		1	14	AM	2018-06-23	2018-06-26	Cage	Dead	TRUE	FALSE	3.5													12.88	21
	Yel/Red		1	14	AM	2018-06-23	2018-06-27	Cage	Dead	TRUE	FALSE	4.5													12.88	21
	Yel/Red		1	14	AM	2018-06-23	2018-06-28	Cage	Dead	TRUE	FALSE	5.5													12.88	21
	Yel/Red		1	14	AM	2018-06-23	2018-07-01	Cage	Dead	TRUE	FALSE	8.5													12.88	21
	Yel/Wht		2	61	AM	2018-06-23	2018-06-23	Cage	Dead	TRUE	FALSE	0.5													13.42	13
	Yel/Wht		1	61	AM	2018-06-23	2018-06-23	Trap	Dead	FALSE	FALSE	0.5													13.42	13
	Yel/Wht		1	61	AM	2018-06-23	2018-06-24	Cage	Dead	TRUE	FALSE	1.5													13.42	13
	Yel/Wht		1	61	PM	2018-06-23	2018-06-24	Cage	Dead	TRUE	FALSE	1													13.42	13
	Yel/Wht		2	61	AM	2018-06-23	2018-06-25	Cage	Dead	TRUE	FALSE	2.5													13.42	13
	Yel/Wht		2	61	AM	2018-06-23	2018-06-25	Trap	Dead	FALSE	FALSE	2.5													13.42	13
	Yel/Wht		1	61	PM	2018-06-23	2018-06-25	Trap	Dead	FALSE	FALSE	2													13.42	13
	Yel/Wht		2	61	AM	2018-06-23	2018-06-26	Trap	Dead	FALSE	FALSE	3.5													13.42	13
	Yel/Wht		2	61	PM	2018-06-23	2018-06-26	Cage	Dead	TRUE	FALSE	3													13.42	13
	Yel/Wht		1	61	PM	2018-06-23	2018-06-26	Trap	Dead	FALSE	FALSE	3													13.42	13
	Yel/Wht		3	61	AM	2018-06-23	2018-06-27	Cage	Dead	TRUE	FALSE	4.5													13.42	13
	Yel/Wht		1	61	AM	2018-06-23	2018-06-28	Cage	Dead	TRUE	FALSE	5.5													13.42	13
	Yel/Wht		1	61	AM	2018-06-23	2018-06-28	Cage	Dead	TRUE	FALSE	5.5													13.42	13
	Yel/Wht		1	61	AM	2018-06-23	2018-06-28	Trap	Dead	FALSE	FALSE	5.5													13.42	13
	Yel/Wht		2	61	AM	2018-06-23	2018-06-29	Cage	Dead	TRUE	FALSE	6.5													13.42	13
	Yel/Wht		2	61	AM	2018-06-23	2018-06-29	Cage	Dead	TRUE	FALSE	6.5													13.42	13
	Yel/Wht		3	61	AM	2018-06-23	2018-06-30	Cage	Dead	TRUE	FALSE	7.5													13.42	13
	Yel/Wht		1	61	PM	2018-06-23	2018-06-30	Cage	Dead	TRUE	FALSE	7													13.42	13
	Yel/Wht		3	61	AM	2018-06-23	2018-07-01	Cage	Dead	TRUE	FALSE	8.5													13.42	13
	Yel/Wht		4	61	PM	2018-06-23	2018-07-01	Cage	Dead	TRUE	FALSE	8													13.42	13
	Yel/Wht		4	61	AM	2018-06-23	2018-07-02	Cage	Dead	TRUE	FALSE	9.5													13.42	13
	Yel/Wht		1	61	AM	2018-06-23	2018-07-02	Trap	Dead	FALSE	FALSE	9.5													13.42	13
	Yel/Wht		1	61	PM	2018-06-23	2018-07-02	Cage	Dead	TRUE	FALSE	9													13.42	13
	Yel/Wht		2	61	PM	2018-06-23	2018-07-03	Cage	Dead	TRUE	FALSE	10													13.42	13
	Yel/Wht		1	61	PM	2018-06-23	2018-07-04	Cage	Dead	TRUE	FALSE	11													13.42	13
	Yel/Wht		3	61	PM	2018-06-23	2018-07-05	Cage	Dead	TRUE	FALSE	12													13.42	13
	Yel/Wht		1	61	AM	2018-06-23	2018-07-06	Cage	Dead	TRUE	FALSE	13.5													13.42	13
	Yel/Wht		4	61	PM	2018-06-23	2018-07-07	Cage	Dead	TRUE	FALSE	14													13.42	13
	Yel/Wht		1	61	AM	2018-06-23	2018-07-08	Cage	Dead	TRUE	FALSE	15.5													13.42	13
	Yel/Wht		1	61	PM	2018-06-23	2018-07-11	Cage	Dead	TRUE	FALSE	18													13.42	13
	Yel/Wht		1	61	PM	2018-06-23	2018-07-14	Cage	Dead	TRUE	FALSE	21													13.42	13
	Yel/Yel		1	32	AM	2018-06-23	2018-06-29	Cage	Dead	TRUE	FALSE	6.5													13.27	9
	Yel/Yel		1	32	PM	2018-06-23	2018-07-08	Cage	Dead	TRUE	FALSE	15													13.27	9
[truncated: 1 more rows]

## Sheet: Sheet1
Tagged						Marked
Source	Dead	Live	Lost			Source	Foster	Dead	Tallied	Dissected				Collection numbers
A	20	6	6			A	AM	340	169	41				Emergence data	207
C	0	7	5			A	PM	117	93	55				Flight data	1891
D	44	36	26			B	AM	39	42	24				Dissected	565
E	7	9	18			B	PM	15	50	24				Counted	887
F	6	12	5			C	AM	23	15	26
						C	PM	11	11	20
						D	AM	109	188	84
						D	PM	62	108	69
						E	AM	64	84	46
						E	PM	16	14	44
						F	AM	14	78	21
						F	PM	21	35	41
Flight
Source	Foster	Flew	Censored	Excluded
A	AM	216	118	248
A	PM	148	57	60
B	AM	66	24	15
B	PM	74	7	8
C	AM	48	13	15
C	PM	31	8	3
D	AM	308	96	83
D	PM	177	42	20
E	AM	139	41	48
E	PM	58	8	8
F	AM	111	11	14
F	PM	76	14	7
